# Supplementary material for: The influence of study characteristics on reporting of subgroup analyses in randomised controlled trials: systematic review
Source: PubMed Central journal article supplement — BMJ. 2011 Mar 28;342:d1569. doi: 10.1136/bmj.d1569 (PMC6173170; doi:10.1136/bmj.d1569), 2011-03-28
Supplement: sunx815076.ww1_default.pdf [file sunx815076.ww1_default.pdf]

## **Appendix 1: Search Strategies**

1. exp Randomized Controlled Trials/
2. (randomized controlled trial\$ or randomised controlled trial\$).mp. [mp = title, original title, abstract, name of substance word, subject heading word]
3. (randomized trial\$ or randomised trial\$).mp. [mp = title, original title, abstract, name of substance word, subject heading word]
4. (randomized clinical trial\$ or randomised clinical trial\$).mp. [mp = title, original title, abstract, name of substance word, subject heading word]
5. 1 or 2 or 3 or 4
6. limit 5 to (English language and humans and "core clinical journals (aim)" and yr="2007")

**Appendix 2: Core Clinical Journals (also termed “Indexed AIM Journals”) as of February 2008**

| <b>NLM Unique ID</b>    | <b>Full Journal Title</b>                                                                     |
|-------------------------|-----------------------------------------------------------------------------------------------|
| <a href="#">8904605</a> | Academic medicine : journal of the Association of American Medical Colleges                   |
| <a href="#">7708173</a> | AJR. American journal of roentgenology                                                        |
| <a href="#">1272646</a> | American family physician                                                                     |
| <a href="#">0370465</a> | American heart journal                                                                        |
| <a href="#">0207277</a> | The American journal of cardiology                                                            |
| <a href="#">0376027</a> | The American journal of clinical nutrition                                                    |
| <a href="#">0370470</a> | American journal of clinical pathology                                                        |
| <a href="#">0267200</a> | The American journal of medicine                                                              |
| <a href="#">0372646</a> | The American journal of nursing                                                               |
| <a href="#">0370476</a> | American journal of obstetrics and gynecology                                                 |
| <a href="#">0370500</a> | American journal of ophthalmology                                                             |
| <a href="#">0370502</a> | American journal of pathology                                                                 |
| <a href="#">8803677</a> | American journal of physical medicine & rehabilitation / Association of Academic Physiatrists |
| <a href="#">0370512</a> | The American journal of psychiatry                                                            |
| <a href="#">1254074</a> | American journal of public health                                                             |
| <a href="#">9421642</a> | American journal of respiratory and critical care medicine                                    |
| <a href="#">0370473</a> | American journal of surgery                                                                   |
| <a href="#">0370506</a> | The American journal of the medical sciences                                                  |
| <a href="#">0370507</a> | The American journal of tropical medicine and hygiene                                         |
| <a href="#">0370524</a> | Anaesthesia                                                                                   |
| <a href="#">1310650</a> | Anesthesia and analgesia                                                                      |
| <a href="#">1300217</a> | Anesthesiology                                                                                |
| <a href="#">8002646</a> | Annals of emergency medicine                                                                  |
| <a href="#">0372351</a> | Annals of internal medicine                                                                   |
| <a href="#">0407300</a> | The Annals of otology, rhinology, and laryngology                                             |

|                           |                                                                                                                         |
|---------------------------|-------------------------------------------------------------------------------------------------------------------------|
| <a href="#">0372354</a>   | Annals of surgery                                                                                                       |
| <a href="#">15030100R</a> | The Annals of thoracic surgery                                                                                          |
| <a href="#">0372433</a>   | Archives of dermatology                                                                                                 |
| <a href="#">0372434</a>   | Archives of disease in childhood                                                                                        |
| <a href="#">9501297</a>   | Archives of disease in childhood. Fetal and neonatal edition                                                            |
| <a href="#">101282564</a> | Archives of environmental & occupational health [continues Archives of environmental health]                            |
| <a href="#">0372435</a>   | Archives of general psychiatry                                                                                          |
| <a href="#">0372440</a>   | Archives of internal medicine                                                                                           |
| <a href="#">0372436</a>   | Archives of neurology                                                                                                   |
| <a href="#">7706534</a>   | Archives of ophthalmology                                                                                               |
| <a href="#">8603209</a>   | Archives of otolaryngology--head & neck surgery                                                                         |
| <a href="#">7607091</a>   | Archives of pathology & laboratory medicine                                                                             |
| <a href="#">9422751</a>   | Archives of pediatrics & adolescent medicine                                                                            |
| <a href="#">2985158R</a>  | Archives of physical medicine and rehabilitation                                                                        |
| <a href="#">9716528</a>   | Archives of surgery (Chicago, Ill : 1960)                                                                               |
| <a href="#">0370605</a>   | Arthritis and rheumatism                                                                                                |
| <a href="#">100935741</a> | BJOG : an international journal of obstetrics and gynaecology [continues British journal of obstetrics and gynaecology] |
| <a href="#">7603509</a>   | Blood                                                                                                                   |
| <a href="#">8900488</a>   | BMJ (Clinical research ed)                                                                                              |
| <a href="#">0372537</a>   | Brain; a journal of neurology                                                                                           |
| <a href="#">0373125</a>   | The British journal of radiology                                                                                        |
| <a href="#">0372553</a>   | The British journal of surgery                                                                                          |
| <a href="#">0370647</a>   | CA: a cancer journal for clinicians                                                                                     |
| <a href="#">0374236</a>   | Cancer                                                                                                                  |
| <a href="#">0231335</a>   | Chest                                                                                                                   |
| <a href="#">0147763</a>   | Circulation                                                                                                             |
| <a href="#">0075674</a>   | Clinical orthopaedics and related research                                                                              |

|                           |                                                                                                                                                                                                                         |
|---------------------------|-------------------------------------------------------------------------------------------------------------------------------------------------------------------------------------------------------------------------|
| <a href="#">0372606</a>   | Clinical pediatrics                                                                                                                                                                                                     |
| <a href="#">101241654</a> | Clinical toxicology : the official journal of the American Academy of Clinical Toxicology and European Association of Poisons Centres and Clinical Toxicologists [continues Journal of toxicology. Clinical toxicology] |
| <a href="#">0372741</a>   | Clinical pharmacology and therapeutics                                                                                                                                                                                  |
| <a href="#">9711805</a>   | CMAJ : Canadian Medical Association journal = journal de l'Association medicale canadienne                                                                                                                              |
| <a href="#">0355501</a>   | Critical care medicine                                                                                                                                                                                                  |
| <a href="#">0372617</a>   | Current problems in surgery                                                                                                                                                                                             |
| <a href="#">0372763</a>   | Diabetes                                                                                                                                                                                                                |
| <a href="#">7902782</a>   | Digestive diseases and sciences                                                                                                                                                                                         |
| <a href="#">0370657</a>   | Disease-a-month : DM                                                                                                                                                                                                    |
| <a href="#">0375040</a>   | Endocrinology                                                                                                                                                                                                           |
| <a href="#">0374630</a>   | Gastroenterology                                                                                                                                                                                                        |
| <a href="#">2985102R</a>  | Geriatrics                                                                                                                                                                                                              |
| <a href="#">2985108R</a>  | Gut                                                                                                                                                                                                                     |
| <a href="#">0330057</a>   | Heart & lung : the journal of critical care                                                                                                                                                                             |
| <a href="#">9602087</a>   | Heart (British Cardiac Society)                                                                                                                                                                                         |
| <a href="#">9312077</a>   | Hospitals & health networks / AHA                                                                                                                                                                                       |
| <a href="#">7501160</a>   | JAMA : the journal of the American Medical Association                                                                                                                                                                  |
| <a href="#">1275002</a>   | The Journal of allergy and clinical immunology                                                                                                                                                                          |
| <a href="#">0014030</a>   | The Journal of bone and joint surgery American volume                                                                                                                                                                   |
| <a href="#">0375355</a>   | The Journal of bone and joint surgery British volume                                                                                                                                                                    |
| <a href="#">0375362</a>   | The Journal of clinical endocrinology and metabolism                                                                                                                                                                    |
| <a href="#">7802877</a>   | The Journal of clinical investigation                                                                                                                                                                                   |
| <a href="#">0376601</a>   | Journal of clinical pathology                                                                                                                                                                                           |
| <a href="#">7502590</a>   | The Journal of family practice                                                                                                                                                                                          |
| <a href="#">2985117R</a>  | Journal of immunology (Baltimore, Md : 1950)                                                                                                                                                                            |
| <a href="#">0413675</a>   | The Journal of infectious diseases                                                                                                                                                                                      |
| <a href="#">8706896</a>   | The Journal of laryngology and otology                                                                                                                                                                                  |

|                          |                                                                                                                             |
|--------------------------|-----------------------------------------------------------------------------------------------------------------------------|
| <a href="#">0375402</a>  | The Journal of nervous and mental disease                                                                                   |
| <a href="#">0253357</a>  | Journal of neurosurgery                                                                                                     |
| <a href="#">1263116</a>  | The Journal of nursing administration                                                                                       |
| <a href="#">8206428</a>  | Journal of oral and maxillofacial surgery : official journal of the American Association of Oral and Maxillofacial Surgeons |
| <a href="#">0375410</a>  | The Journal of pediatrics                                                                                                   |
| <a href="#">8301365</a>  | Journal of the American College of Cardiology                                                                               |
| <a href="#">9431305</a>  | Journal of the American College of Surgeons                                                                                 |
| <a href="#">7503061</a>  | Journal of the American Dietetic Association                                                                                |
| <a href="#">0376343</a>  | The Journal of thoracic and cardiovascular surgery                                                                          |
| <a href="#">0376373</a>  | The Journal of trauma                                                                                                       |
| <a href="#">0376374</a>  | The Journal of urology                                                                                                      |
| <a href="#">9502837</a>  | The journals of gerontology. Series A, Biological sciences and medical sciences                                             |
| <a href="#">9508483</a>  | The journals of gerontology. Series B, Psychological sciences and social sciences                                           |
| <a href="#">2985213R</a> | Lancet                                                                                                                      |
| <a href="#">0405543</a>  | Mayo Clinic proceedings                                                                                                     |
| <a href="#">2985236R</a> | The Medical clinics of North America                                                                                        |
| <a href="#">2985240R</a> | The Medical letter on drugs and therapeutics                                                                                |
| <a href="#">2985248R</a> | Medicine; analytical reviews of general medicine, neurology, psychiatry, dermatology, and pediatrics                        |
| <a href="#">0401060</a>  | Neurology                                                                                                                   |
| <a href="#">0255562</a>  | The New England journal of medicine                                                                                         |
| <a href="#">0042033</a>  | The Nursing clinics of North America                                                                                        |
| <a href="#">0401075</a>  | Nursing outlook                                                                                                             |
| <a href="#">0376404</a>  | Nursing research                                                                                                            |
| <a href="#">0401101</a>  | Obstetrics and gynecology                                                                                                   |
| <a href="#">0254463</a>  | The Orthopedic clinics of North America                                                                                     |
| <a href="#">0401126</a>  | Pediatric clinics of North America                                                                                          |
| <a href="#">0376422</a>  | Pediatrics                                                                                                                  |

|                           |                                                                                                                                      |
|---------------------------|--------------------------------------------------------------------------------------------------------------------------------------|
| <a href="#">0022623</a>   | Physical therapy                                                                                                                     |
| <a href="#">1306050</a>   | Plastic and reconstructive surgery                                                                                                   |
| <a href="#">0376442</a>   | Progress in cardiovascular diseases                                                                                                  |
| <a href="#">9716844</a>   | Public health reports (Washington, D.C. : 1974)                                                                                      |
| <a href="#">0123703</a>   | Radiologic clinics of North America                                                                                                  |
| <a href="#">0401260</a>   | Radiology                                                                                                                            |
| <a href="#">100883501</a> | Rheumatology (Oxford, England) [continues British journal of rheumatology]                                                           |
| <a href="#">0404522</a>   | Southern medical journal                                                                                                             |
| <a href="#">0417347</a>   | Surgery                                                                                                                              |
| <a href="#">0074243</a>   | The Surgical clinics of North America                                                                                                |
| <a href="#">101280339</a> | Translational research : the journal of laboratory and clinical medicine [continues The Journal of laboratory and clinical medicine] |
| <a href="#">0423221</a>   | The Urologic clinics of North America                                                                                                |

### **Appendix 3: Approaches to selecting the primary outcome**

At the full text screening stage, the reviewers will select a primary outcome for eligible studies, using the following strategy: If the report specifies a primary outcome, we will select it as the primary outcome; if the report specifies more than one primary outcome (i.e. co-primary outcomes), we will select the one with the largest number of subgroup analyses; if outcomes have the same number of subgroup analyses, we will select the one with the greatest relevance to patients according to a pre-defined outcome hierarchy (shown in the table below), and if more than one outcome are in the same category, we will take the first reported outcome in the abstract. If the report does not specify a primary outcome, we will select the outcome used for the study sample size calculation, but if there is no sample size calculation reported or if there is a sample size calculation for several outcomes, we will proceed as detailed in the previous sentence.

**Table: Hierarchy of outcomes**

|      |                                                                                                                            |
|------|----------------------------------------------------------------------------------------------------------------------------|
| I.   | Mortality                                                                                                                  |
|      | 1) all cause mortality                                                                                                     |
|      | 2) disease specific mortality                                                                                              |
| II.  | Morbidity                                                                                                                  |
|      | 1) cardiovascular major morbid events                                                                                      |
|      | 2) other major morbid events (e.g. loss of vision, seizures, fracture, revascularization)                                  |
|      | 3) recurrence/relapse/remission of cancer/disease free survival                                                            |
|      | 4) renal failure requiring dialysis                                                                                        |
|      | 5) hospitalizations                                                                                                        |
|      | 6) infections                                                                                                              |
|      | 7) dermatological/ rheumatologic disorders                                                                                 |
| III. | Symptoms/Quality of life/Functional status (e.g. failure to become pregnant, successful nursing/breastfeeding, depression) |
| IV.  | Surrogate outcomes (e.g. viral load, physical activity, post operative atrial fibrillation)                                |

#### **Appendix 4: Selection of pair-wise comparisons**

Reviewers will identify a pair-wise comparison of interest, using the following strategy. If there are only two groups, we will use them for the pair-wise comparison. If there are three or more groups, we will select the comparison that was clearly and explicitly defined as the primary comparison in the study report; if the primary comparison was not explicitly defined, we will select the comparison that reports the largest number of subgroup analyses for the selected primary outcome; if more than one comparison reported the same largest number of subgroup analyses, we will select the comparison that reports the smallest interaction p value; if the interaction p value is not available, we will select the one that has the smallest p value for the main effect.

#### **Appendix 5: List of Included Studies (in alphabetic order of the last name of the first author)**

1. Aaron SD, Vandemheen KL, Fergusson D, Maltais F, Bourbeau J, Goldstein R, et al. Tiotropium in combination with placebo, salmeterol, or fluticasone-salmeterol for treatment of chronic obstructive pulmonary disease: A randomized trial.[see comment][summary for patients in ann intern med. 2007 apr 17;146(8):112; pmid: 17310044]. *Ann Intern Med* 2007;146:545-55.
2. Addolorato G, Leggio L, Ferrulli A, Cardone S, Vonghia L, Mirijello A, et al. Effectiveness and safety of baclofen for maintenance of alcohol abstinence in alcohol-dependent patients with liver cirrhosis: Randomised, double-blind controlled study.[see comment]. *Lancet* 2007;370:1915-22.
3. Adu-Afarwuah S, Lartey A, Brown KH, Zlotkin S, Briend A, Dewey KG. Randomized comparison of 3 types of micronutrient supplements for home fortification of complementary foods in ghana: Effects on growth and motor development. *Am J Clin Nutr* 2007;86:412-20.
4. ADVANCE Collobarative Group, Patel A, Group AC, MacMahon S, Chalmers J, Neal B, et al. Effects of a fixed combination of perindopril and indapamide on macrovascular and microvascular outcomes in patients with type 2 diabetes mellitus (the advance trial): A randomised controlled trial.[see comment]. *Lancet* 2007;370:829-40.
5. Agnelli G, Gallus A, Goldhaber SZ, Haas S, Huisman MV, Hull RD, et al. Treatment of proximal deep-vein thrombosis with the oral direct factor xa inhibitor rivaroxaban (bay 59-7939): The odixa-dvt (oral direct factor xa inhibitor bay 59-7939 in patients with acute symptomatic deep-vein thrombosis) study.[see comment]. *Circulation* 2007;116:180-7.
6. Ahimastos AA, Aggarwal A, D'Orsa KM, Formosa MF, White AJ, Savarirayan R, et al. Effect of perindopril on large artery stiffness and aortic root diameter in patients with marfan syndrome: A randomized controlled trial. *JAMA* 2007;298:1539-47.
7. Ainsworth R, Dziedzic K, Hiller L, Daniels J, Bruton A, Broadfield J. A prospective double blind placebo-controlled randomized trial of ultrasound in the physiotherapy treatment of shoulder pain. *Rheumatology* 2007;46:815-20.
8. Ajalloueyan M, Fartookzadeh M, Parhizgar H. Use of laser for dacrocystorhinostomy. *Arch Otolaryngol Head Neck Surg* 2007;133:340-3.



9. Albert JD, Meadeb J, Guggenbuhl P, Marin F, Benkalfate T, Thomazeau H, et al. High-energy extracorporeal shock-wave therapy for calcifying tendinitis of the rotator cuff: A randomised trial. *Journal of Bone & Joint Surgery - British Volume* 2007;89:335-41.
10. Albo ME, Richter HE, Brubaker L, Norton P, Kraus SR, Zimmern PE, et al. Burch colposuspension versus fascial sling to reduce urinary stress incontinence.[see comment]. *N Engl J Med* 2007;356:2143-55.
11. Alho OP, Koivunen P, Penna T, Teppo H, Koskela M, Luotonen J. Tonsillectomy versus watchful waiting in recurrent streptococcal pharyngitis in adults: Randomised controlled trial.[see comment]. *BMJ* 2007;334:939.
12. Andang'o PE, Osendarp SJ, Ayah R, West CE, Mwaniki DL, De Wolf CA, et al. Efficacy of iron-fortified whole maize flour on iron status of schoolchildren in kenya: A randomised controlled trial.[see comment]. *Lancet* 2007;369:1799-806.
13. Anderson DR, Kahn SR, Rodger MA, Kovacs MJ, Morris T, Hirsch A, et al. Computed tomographic pulmonary angiography vs ventilation-perfusion lung scanning in patients with suspected pulmonary embolism: A randomized controlled trial.[see comment]. *JAMA* 2007;298:2743-53.
14. Aouad MT, Yazbeck-Karam VG, Nasr VG, El-Khatib MF, Kanazi GE, Bleik JH. A single dose of propofol at the end of surgery for the prevention of emergence agitation in children undergoing strabismus surgery during sevoflurane anesthesia. *Anesthesiology* 2007;107:733-8.
15. Apex Ami Investigators, Armstrong PW, Granger CB, Adams PX, Hamm C, Holmes D, Jr., et al. Pexelizumab for acute st-elevation myocardial infarction in patients undergoing primary percutaneous coronary intervention: A randomized controlled trial.[see comment]. *JAMA* 2007;297:43-51.
16. Astermark J, Donfield SM, DiMichele DM, Gringeri A, Gilbert SA, Waters J, et al. A randomized comparison of bypassing agents in hemophilia complicated by an inhibitor: The feiba novoseven comparative (fenoc) study. *Blood* 2007;109:546-51.
17. Ayan S, Topsakal K, Gokce G, Gultekin EY. Efficacy of combined anticholinergic treatment and behavioral modification as a first line treatment for nonneurogenic and nonanatomical voiding dysfunction in children: A randomized controlled trial. *J Urol* 2007;177:2325-8; discussion 28-9.
18. Bailey RC, Moses S, Parker CB, Agot K, Maclean I, Krieger JN, et al. Male circumcision for hiv prevention in young men in kisumu, kenya: A randomised controlled trial.[see comment]. *Lancet* 2007;369:643-56.
19. Ballantyne CM, Weiss R, Moccetti T, Vogt A, Eber B, Sosef F, et al. Efficacy and safety of rosuvastatin 40 mg alone or in combination with ezetimibe in patients at high risk of cardiovascular disease (results from the explorer study). *Am J Cardiol* 2007;99:673-80.
20. Banikazemi M, Bultas J, Waldek S, Wilcox WR, Whitley CB, McDonald M, et al. Agalsidase-beta therapy for advanced fabry disease: A randomized trial.[see comment]. *Ann Intern Med* 2007;146:77-86.
21. Banks EH, Chudnoff S, Karmin I, Wang C, Pardanani S. Does a surgical simulator improve resident operative performance of laparoscopic tubal ligation? *Am J Obstet Gynecol* 2007;197:541.e1-5.
22. Banu SH, Jahan M, Koli UK, Ferdousi S, Khan NZ, Neville B. Side effects of phenobarbital and carbamazepine in childhood epilepsy: Randomised controlled trial.[see comment]. *BMJ* 2007;334:1207.
23. Barak M, Philipchuck P, Abecassis P, Katz Y. A comparison of the truviv blade with the macintosh blade in adult patients. *Anaesthesia* 2007;62:827-31.
24. Barter PJ, Caulfield M, Eriksson M, Grundy SM, Kastelein JJ, Komajda M, et al. Effects of torcetrapib in patients at high risk for coronary events.[see comment]. *N Engl J Med* 2007;357:2109-22.

25. Bashshur ZF, Schakal A, Hamam RN, El Haibi CP, Jaafar RF, Nouredin BN. Intravitreal bevacizumab vs verteporfin photodynamic therapy for neovascular age-related macular degeneration. *Arch Ophthalmol* 2007;125:1357-61.
26. Bassett SF, Prapavessis H. Home-based physical therapy intervention with adherence-enhancing strategies versus clinic-based management for patients with ankle sprains. *Phys Ther* 2007;87:1132-43.
27. Batsky DL, Sorof JM, Sugg J, Llewellyn M, Klibaner M, Hainer JW, et al. Efficacy and safety of extended release metoprolol succinate in hypertensive children 6 to 16 years of age: A clinical trial experience.[see comment]. *J Pediatr*;150:134-9.
28. Beaupre LA, al-Yamani M, Huckell JR, Johnston DWC. Hydroxyapatite-coated tibial implants compared with cemented tibial fixation in primary total knee arthroplasty. A randomized trial of outcomes at five years. *Journal of Bone & Joint Surgery - American Volume* 2007;89:2204-11.
29. Bech BH, Obel C, Henriksen TB, Olsen J. Effect of reducing caffeine intake on birth weight and length of gestation: Randomised controlled trial.[see comment]. *BMJ* 2007;334:409.
30. Bell JG, Shaffer LE, Schrickel-Feller T. Randomized trial comparing 3 methods of postoperative analgesia in gynecology patients: Patient-controlled intravenous, scheduled intravenous, and scheduled subcutaneous. *Am J Obstet Gynecol* 2007;197:472.e1-7.
31. Bello-Haas VD, Florence JM, Kloos AD, Scheirbecker J, Lopate G, Hayes SM, et al. A randomized controlled trial of resistance exercise in individuals with ALS. *Neurology* 2007;68:2003-7.
32. Belshe RB, Edwards KM, Vesikari T, Black SV, Walker RE, Hultquist M, et al. Live attenuated versus inactivated influenza vaccine in infants and young children.[see comment]. *N Engl J Med* 2007;356:685-96.
33. Berlucchi M, Salsi D, Valetti L, Parrinello G, Nicolai P. The role of mometasone furoate aqueous nasal spray in the treatment of adenoidal hypertrophy in the pediatric age group: Preliminary results of a prospective, randomized study. *Pediatrics* 2007;119:e1392-7.
34. Bhagat SK, Chacko NK, Kekre NS, Gopalakrishnan G, Antonisamy B, Devasia A. Is there a role for tamsulosin in shock wave lithotripsy for renal and ureteral calculi? *J Urol* 2007;177:2185-8.
35. Biai S, Rodrigues A, Gomes M, Ribeiro I, Sodemann M, Alves F, et al. Reduced in-hospital mortality after improved management of children under 5 years admitted to hospital with malaria: Randomised trial.[see comment]. *BMJ* 2007;335:862.
36. Black DM, Delmas PD, Eastell R, Reid IR, Boonen S, Cauley JA, et al. Once-yearly zoledronic acid for treatment of postmenopausal osteoporosis.[see comment]. *N Engl J Med* 2007;356:1809-22.
37. Bleyen I, van den Bosch WA, Bockholts D, Mulder P, Paridaens D. Silicone intubation with or without balloon dacryocystoplasty in acquired partial nasolacrimal duct obstruction. *Am J Ophthalmol* 2007;144:776-80.
38. Bolton P, Bass J, Betancourt T, Speelman L, Onyango G, Clougherty KF, et al. Interventions for depression symptoms among adolescent survivors of war and displacement in northern Uganda: A randomized controlled trial.[see comment]. *JAMA* 2007;298:519-27.
39. Borland M, Jacobs I, King B, O'Brien D. A randomized controlled trial comparing intranasal fentanyl to intravenous morphine for managing acute pain in children in the emergency department. *Ann Emerg Med* 2007;49:335-40.
40. Botoni FA, Poole-Wilson PA, Ribeiro AL, Okonko DO, Oliveira BM, Pinto AS, et al. A randomized trial of carvedilol after renin-angiotensin system inhibition in chronic Chagas cardiomyopathy. *Am Heart J* 2007;153:544.e1-8.
41. Brandes JL, Kudrow D, Stark SR, O'Carroll CP, Adelman JU, O'Donnell FJ, et al. Sumatriptan-naproxen for acute treatment of migraine: A randomized trial. *JAMA* 2007;297:1443-54.

42. Briguori C, Airoidi F, D'Andrea D, Bonizzoni E, Morici N, Focaccio A, et al. Renal insufficiency following contrast media administration trial (remedial): A randomized comparison of 3 preventive strategies. *Circulation* 2007;115:1211-7.
43. Brisinda G, Cadeddu F, Brandara F, Marniga G, Maria G. Randomized clinical trial comparing botulinum toxin injections with 0.2 per cent nitroglycerin ointment for chronic anal fissure. *Br J Surg* 2007;94:162-7.
44. Brotman LM, Gouley KK, Huang KY, Kamboukos D, Fratto C, Pine DS. Effects of a psychosocial family-based preventive intervention on cortisol response to a social challenge in preschoolers at high risk for antisocial behavior. *Arch Gen Psychiatry* 2007;64:1172-9.
45. Brown CT, Yap T, Cromwell DA, Rixon L, Steed L, Mulligan K, et al. Self management for men with lower urinary tract symptoms: Randomised controlled trial.[see comment][erratum appears in bmj. 2007 sep 1;335(7617):0]. *BMJ* 2007;334:25.
46. Bulkman NW, Berkhof J, Rozendaal L, van Kemenade FJ, Boeke AJ, Bulk S, et al. Human papillomavirus DNA testing for the detection of cervical intraepithelial neoplasia grade 3 and cancer: 5-year follow-up of a randomised controlled implementation trial.[see comment]. *Lancet* 2007;370:1764-72.
47. Burns T, Catty J, Becker T, Drake RE, Fioritti A, Knapp M, et al. The effectiveness of supported employment for people with severe mental illness: A randomised controlled trial.[see comment]. *Lancet* 2007;370:1146-52.
48. Bussel JB, Cheng G, Saleh MN, Psaila B, Kovaleva L, Meddeb B, et al. Eltrombopag for the treatment of chronic idiopathic thrombocytopenic purpura.[see comment]. *N Engl J Med* 2007;357:2237-47.
49. Campbell IA, Bentley DP, Prescott RJ, Routledge PA, Shetty HG, Williamson IJ. Anticoagulation for three versus six months in patients with deep vein thrombosis or pulmonary embolism, or both: Randomised trial.[see comment]. *BMJ* 2007;334:674.
50. Canadian Orthopaedic Trauma S. Nonoperative treatment compared with plate fixation of displaced midshaft clavicular fractures. A multicenter, randomized clinical trial. *Journal of Bone & Joint Surgery - American Volume* 2007;89:1-10.
51. Canani RB, Cirillo P, Terrin G, Cesarano L, Spagnuolo MI, De Vincenzo A, et al. Probiotics for treatment of acute diarrhoea in children: Randomised clinical trial of five different preparations.[see comment]. *BMJ* 2007;335:340.
52. Carlson JJ, Farquhar JW, DiNucci E, Ausserer L, Zehnder J, Miller D, et al. Safety and efficacy of a ginkgo biloba-containing dietary supplement on cognitive function, quality of life, and platelet function in healthy, cognitively intact older adults.[see comment]. *J Am Diet Assoc* 2007;107:422-32.
53. Casati A, Danelli G, Baciarello M, Corradi M, Leone S, Di Cianni S, et al. A prospective, randomized comparison between ultrasound and nerve stimulation guidance for multiple injection axillary brachial plexus block.[see comment]. *Anesthesiology* 2007;106:992-6.
54. Catovsky D, Richards S, Matutes E, Oscier D, Dyer MJ, Bezares RF, et al. Assessment of fludarabine plus cyclophosphamide for patients with chronic lymphocytic leukaemia (the lrf cl14 trial): A randomised controlled trial.[see comment]. *Lancet* 2007;370:230-9.
55. Chan DS, Callahan CW, Hatch-Pigott VB, Lawless A, Proffitt HL, Manning NE, et al. Internet-based home monitoring and education of children with asthma is comparable to ideal office-based care: Results of a 1-year asthma in-home monitoring trial. *Pediatrics* 2007;119:569-78.
56. Chan FK, Wong VW, Suen BY, Wu JC, Ching JY, Hung LC, et al. Combination of a cyclo-oxygenase-2 inhibitor and a proton-pump inhibitor for prevention of recurrent ulcer bleeding in patients at very high risk: A double-blind, randomised trial.[see comment]. *Lancet* 2007;369:1621-6.
57. Chan HL, Heathcote EJ, Marcellin P, Lai CL, Cho M, Moon YM, et al. Treatment of hepatitis b e antigen positive chronic hepatitis with telbivudine or adefovir: A randomized trial.[see comment][summary for patients in ann intern med. 2007 dec 4;147(11):I16; pmid:

- 17909200]. *Ann Intern Med* 2007;147:745-54.
58. Chan KK, Tam KF, Tse KY, Ngan HY. The use of vaginal antimicrobial after large loop excision of transformation zone: A prospective randomised trial. *BJOG: An International Journal of Obstetrics & Gynaecology* 2007;114:970-6.
  59. Chang TS, Bressler NM, Fine JT, Dolan CM, Ward J, Klesert TR, et al. Improved vision-related function after ranibizumab treatment of neovascular age-related macular degeneration: Results of a randomized clinical trial. *Arch Ophthalmol* 2007;125:1460-9.
  60. Chapman WC, Singla N, Genyk Y, McNeil JW, Renkens KL, Jr., Reynolds TC, et al. A phase 3, randomized, double-blind comparative study of the efficacy and safety of topical recombinant human thrombin and bovine thrombin in surgical hemostasis. *J Am Coll Surg* 2007;205:256-65.
  61. Charles T, Quinn D, Weatherall M, Aldington S, Beasley R, Holt S. An audiovisual reminder function improves adherence with inhaled corticosteroid therapy in asthma. *J Allergy Clin Immunol* 2007;119:811-6.
  62. Choi YS, Bang SO, Shim JK, Chung KY, Kwak YL, Hong YW. Effects of head-down tilt on intrapulmonary shunt fraction and oxygenation during one-lung ventilation in the lateral decubitus position. *J Thorac Cardiovasc Surg* 2007;134:613-8.
  63. Church TS, Earnest CP, Skinner JS, Blair SN. Effects of different doses of physical activity on cardiorespiratory fitness among sedentary, overweight or obese postmenopausal women with elevated blood pressure: A randomized controlled trial.[see comment]. *JAMA* 2007;297:2081-91.
  64. Cinnella G, Meola S, Portincasa A, Parisi D, Morgese F, Pavone G, et al. Sedation analgesia during office-based plastic surgery procedures: Comparison of two opioid regimens. *Plast Reconstr Surg* 2007;119:2263-70.
  65. Clark NM, Gong ZM, Wang SJ, Lin X, Bria WF, Johnson TR. A randomized trial of a self-regulation intervention for women with asthma. *Chest* 2007;132:88-97.
  66. Cohen P, Pagnoux C, Mahr A, Arene JP, Mouthon L, Le Guern V, et al. Churg-strauss syndrome with poor-prognosis factors: A prospective multicenter trial comparing glucocorticoids and six or twelve cyclophosphamide pulses in forty-eight patients. *Arthritis Rheum* 2007;57:686-93.
  67. Cohen SP, Wenzell D, Hurley RW, Kurihara C, Buckenmaier CC, 3rd, Griffith S, et al. A double-blind, placebo-controlled, dose-response pilot study evaluating intradiscal etanercept in patients with chronic discogenic low back pain or lumbosacral radiculopathy. *Anesthesiology* 2007;107:99-105.
  68. Cole BF, Baron JA, Sandler RS, Haile RW, Ahnen DJ, Bresalier RS, et al. Folic acid for the prevention of colorectal adenomas: A randomized clinical trial.[see comment]. *JAMA* 2007;297:2351-9.
  69. Collins JF, Dartt DA, Dana R. Mist delivery of eye medication to the anterior segment. *Am J Ophthalmol* 2007;144:137-9.
  70. Colombel JF, Sandborn WJ, Rutgeerts P, Enns R, Hanauer SB, Panaccione R, et al. Adalimumab for maintenance of clinical response and remission in patients with crohn's disease: The charm trial. *Gastroenterology* 2007;132:52-65.
  71. Conlon NP, Sullivan RP, Herbison PG, Zacharias M, Buggy DJ. The effect of leaving dentures in place on bag-mask ventilation at induction of general anesthesia. *Anesth Analg* 2007;105:370-3.
  72. Conter V, Valsecchi MG, Silvestri D, Campbell M, Dibar E, Magyarosy E, et al. Pulses of vincristine and dexamethasone in addition to intensive chemotherapy for children with intermediate-risk acute lymphoblastic leukaemia: A multicentre randomised trial.[see comment]. *Lancet* 2007;369:123-31.
  73. Coombes RC, Kilburn LS, Snowdon CF, Paridaens R, Coleman RE, Jones SE, et al. Survival and safety of exemestane versus tamoxifen

- after 2-3 years' tamoxifen treatment (intergroup exemestane study): A randomised controlled trial.[see comment]. *Lancet* 2007;369:559-70.
74. Corneli HM, Zorc JJ, Majahan P, Shaw KN, Holubkov R, Reeves SD, et al. A multicenter, randomized, controlled trial of dexamethasone for bronchiolitis.[see comment]. *N Engl J Med* 2007;357:331-9.
  75. Cornely OA, Maertens J, Winston DJ, Perfect J, Ullmann AJ, Walsh TJ, et al. Posaconazole vs. Fluconazole or itraconazole prophylaxis in patients with neutropenia.[see comment]. *N Engl J Med* 2007;356:348-59.
  76. Corwin HL, Gettinger A, Fabian TC, May A, Pearl RG, Heard S, et al. Efficacy and safety of epoetin alfa in critically ill patients.[see comment]. *N Engl J Med* 2007;357:965-76.
  77. Counsell SR, Callahan CM, Clark DO, Tu W, Buttar AB, Stump TE, et al. Geriatric care management for low-income seniors: A randomized controlled trial.[see comment]. *JAMA* 2007;298:2623-33.
  78. Cox G, Thomson NC, Rubin AS, Niven RM, Corris PA, Siersted HC, et al. Asthma control during the year after bronchial thermoplasty.[see comment]. *N Engl J Med* 2007;356:1327-37.
  79. Crisafulli E, Costi S, De Blasio F, Biscione G, Americi F, Penza S, et al. Effects of a walking aid in copd patients receiving oxygen therapy. *Chest* 2007;131:1068-74.
  80. Croghan IT, Hurt RD, Dakhil SR, Croghan GA, Sloan JA, Novotny PJ, et al. Randomized comparison of a nicotine inhaler and bupropion for smoking cessation and relapse prevention. *Mayo Clin Proc* 2007;82:186-95.
  81. Crouse JR, 3rd, Raichlen JS, Riley WA, Evans GW, Palmer MK, O'Leary DH, et al. Effect of rosuvastatin on progression of carotid intima-media thickness in low-risk individuals with subclinical atherosclerosis: The meteor trial.[see comment]. *JAMA* 2007;297:1344-53.
  82. Culleton BF, Walsh M, Klarenbach SW, Mortis G, Scott-Douglas N, Quinn RR, et al. Effect of frequent nocturnal hemodialysis vs conventional hemodialysis on left ventricular mass and quality of life: A randomized controlled trial.[see comment]. *JAMA* 2007;298:1291-9.
  83. Daniels SR, Long B, Crow S, Styne D, Sothorn M, Vargas-Rodriguez I, et al. Cardiovascular effects of sibutramine in the treatment of obese adolescents: Results of a randomized, double-blind, placebo-controlled study. *Pediatrics* 2007;120:e147-57.
  84. Dao B, Blum J, Thieba B, Raghavan S, Ouedraogo M, Lankoande J, et al. Is misoprostol a safe, effective and acceptable alternative to manual vacuum aspiration for postabortion care? Results from a randomised trial in burkina faso, west africa.[see comment]. *BJOG: An International Journal of Obstetrics & Gynaecology* 2007;114:1368-75.
  85. Davis JC, Guy P, Ashe MC, Liu-Ambrose T, Khan K. Hipwatch: Osteoporosis investigation and treatment after a hip fracture: A 6-month randomized controlled trial. *Journals of Gerontology Series A-Biological Sciences & Medical Sciences* 2007;62:888-91.
  86. Dawood MY, Khan-Dawood FS. Clinical efficacy and differential inhibition of menstrual fluid prostaglandin f2alpha in a randomized, double-blind, crossover treatment with placebo, acetaminophen, and ibuprofen in primary dysmenorrhea. *Am J Obstet Gynecol* 2007;196:35.e1-5.
  87. de la Porte PWFB-A, Lok DJA, van Veldhuisen DJ, van Wijngaarden J, Cornel JH, Zuithoff NPA, et al. Added value of a physician-and-nurse-directed heart failure clinic: Results from the deventer-alkmaar heart failure study. *Heart* 2007;93:819-25.
  88. Deitch K, Chudnofsky CR, Dominici P. The utility of supplemental oxygen during emergency department procedural sedation and analgesia with midazolam and fentanyl: A randomized, controlled trial.[see comment]. *Ann Emerg Med* 2007;49:1-8.

89. DeJonge M, Burchfield D, Bloom B, Duenas M, Walker W, Polak M, et al. Clinical trial of safety and efficacy of inh-a21 for the prevention of nosocomial staphylococcal bloodstream infection in premature infants.[see comment]. *J Pediatr*;151:260-5.
90. Dember LM, Hawkins PN, Hazenberg BP, Gorevic PD, Merlini G, Butrimiene I, et al. Eprodisate for the treatment of renal disease in aa amyloidosis.[see comment]. *N Engl J Med* 2007;356:2349-60.
91. Demory D, Michelet P, Arnal JM, Donati S, Forel JM, Gainnier M, et al. High-frequency oscillatory ventilation following prone positioning prevents a further impairment in oxygenation.[see comment]. *Crit Care Med* 2007;35:106-11.
92. Dhonneur G, Ndoko SK, Amathieu R, Attias A, Housseini LE, Polliand C, et al. A comparison of two techniques for inserting the airtraq laryngoscope in morbidly obese patients. *Anaesthesia* 2007;62:774-7.
93. Difede J, Malta LS, Best S, Henn-Haase C, Metzler T, Bryant R, et al. A randomized controlled clinical treatment trial for world trade center attack-related ptsd in disaster workers. *J Nerv Ment Dis* 2007;195:861-5.
94. Dimaano EM, Saito M, Honda S, Miranda EA, Alonzo MTG, Valerio MD, et al. Lack of efficacy of high-dose intravenous immunoglobulin treatment of severe thrombocytopenia in patients with secondary dengue virus infection. *Am J Trop Med Hyg* 2007;77:1135-8.
95. Dimopoulos M, Spencer A, Attal M, Prince HM, Harousseau JL, Dmoszynska A, et al. Lenalidomide plus dexamethasone for relapsed or refractory multiple myeloma.[see comment]. *N Engl J Med* 2007;357:2123-32.
96. Domingo-Triado V, Selfa S, Martinez F, Sanchez-Contreras D, Reche M, Tecles J, et al. Ultrasound guidance for lateral midfemoral sciatic nerve block: A prospective, comparative, randomized study.[see comment]. *Anesth Analg* 2007;104:1270-4.
97. Dondorp AM, Silamut K, Charunwatthana P, Chuasuwanchai S, Ruangveerayut R, Krintratun S, et al. Levamisole inhibits sequestration of infected red blood cells in patients with falciparum malaria. *J Infect Dis* 2007;196:460-6.
98. Donesky-Cuenco D, Janson S, Neuhaus J, Neilands TB, Carrieri-Kohlman V. Adherence to a home-walking prescription in patients with chronic obstructive pulmonary disease. *Heart Lung* 2007;36:348-63.
99. Dorsey G, Staedke S, Clark TD, Njama-Meya D, Nzarubara B, Maiteki-Sebuguzi C, et al. Combination therapy for uncomplicated falciparum malaria in ugandan children: A randomized trial. *JAMA* 2007;297:2210-9.
100. Dracup K, Evangelista LS, Hamilton MA, Erickson V, Hage A, Moriguchi J, et al. Effects of a home-based exercise program on clinical outcomes in heart failure. *Am Heart J* 2007;154:877-83.
101. Durga J, van Boxtel MP, Schouten EG, Kok FJ, Jolles J, Katan MB, et al. Effect of 3-year folic acid supplementation on cognitive function in older adults in the facit trial: A randomised, double blind, controlled trial.[see comment]. *Lancet* 2007;369:208-16.
102. Durga J, Verhoef P, Anteunis LJ, Schouten E, Kok FJ. Effects of folic acid supplementation on hearing in older adults: A randomized, controlled trial.[see comment][summary for patients in ann intern med. 2007 jan 2;146(1):I20; pmid: 17200213]. *Ann Intern Med* 2007;146:1-9.
103. Dyson-Hudson TA, Kadar P, LaFontaine M, Emmons R, Kirshblum SC, Tulsy D, et al. Acupuncture for chronic shoulder pain in persons with spinal cord injury: A small-scale clinical trial. *Arch Phys Med Rehabil* 2007;88:1276-83.
104. Ebbeling CB, Leidig MM, Feldman HA, Lovesky MM, Ludwig DS. Effects of a low-glycemic load vs low-fat diet in obese young adults: A randomized trial. *JAMA* 2007;297:2092-102.
105. Ekberg H, Tedesco-Silva H, Demirbas A, Vitko S, Nashan B, Gurkan A, et al. Reduced exposure to calcineurin inhibitors in renal transplantation.[see comment]. *N Engl J Med* 2007;357:2562-75.

106. Ensini A, Catani F, Leardini A, Romagnoli M, Giannini S. Alignments and clinical results in conventional and navigated total knee arthroplasty. *Clin Orthop* 2007;457:156-62.
107. Eogan M, Daly L, Behan M, O'Connell PR, O'Herlihy C. Randomised clinical trial of a laxative alone versus a laxative and a bulking agent after primary repair of obstetric anal sphincter injury. *BJOG: An International Journal of Obstetrics & Gynaecology* 2007;114:736-40.
108. Epstein JN, Rabiner D, Johnson DE, Fitzgerald DP, Chrisman A, Erkanli A, et al. Improving attention-deficit/hyperactivity disorder treatment outcomes through use of a collaborative consultation treatment service by community-based pediatricians: A cluster randomized trial. *Arch Pediatr Adolesc Med* 2007;161:835-40.
109. Erbil Y, Ozluk Y, Giri M, Salmaslioglu A, Issever H, Barbaros U, et al. Effect of lugol solution on thyroid gland blood flow and microvessel density in the patients with graves' disease. *J Clin Endocrinol Metab* 2007;92:2182-9.
110. Escudier B, Eisen T, Stadler WM, Szczylik C, Oudard S, Siebels M, et al. Sorafenib in advanced clear-cell renal-cell carcinoma.[see comment]. *N Engl J Med* 2007;356:125-34.
111. Escudier B, Pluzanska A, Koralewski P, Ravaud A, Bracarda S, Szczylik C, et al. Bevacizumab plus interferon alfa-2a for treatment of metastatic renal cell carcinoma: A randomised, double-blind phase iii trial.[see comment]. *Lancet* 2007;370:2103-11.
112. Estok PJ, Sedlak CA, Doheny MO, Hall R. Structural model for osteoporosis preventing behavior in postmenopausal women. *Nurs Res* 2007;56:148-58.
113. Facon T, Mary JY, Hulin C, Benboubker L, Attal M, Pegourie B, et al. Melphalan and prednisone plus thalidomide versus melphalan and prednisone alone or reduced-intensity autologous stem cell transplantation in elderly patients with multiple myeloma (ifm 99-06): A randomised trial.[see comment]. *Lancet* 2007;370:1209-18.
114. Falutz J, Allas S, Blot K, Potvin D, Kotler D, Somero M, et al. Metabolic effects of a growth hormone-releasing factor in patients with hiv.[see comment]. *N Engl J Med* 2007;357:2359-70.
115. Farmer A, Wade A, Goyder E, Yudkin P, French D, Craven A, et al. Impact of self monitoring of blood glucose in the management of patients with non-insulin treated diabetes: Open parallel group randomised trial.[see comment]. *BMJ* 2007;335:132.
116. Fawzi WW, Msamanga GI, Urassa W, Hertzmark E, Petraro P, Willett WC, et al. Vitamins and perinatal outcomes among hiv-negative women in tanzania. *N Engl J Med* 2007;356:1423-31.
117. Ferme C, Eghbali H, Meerwaldt JH, Rieux C, Bosq J, Berger F, et al. Chemotherapy plus involved-field radiation in early-stage hodgkin's disease.[see comment]. *N Engl J Med* 2007;357:1916-27.
118. Flachskampf FA, Gallasch J, Gefeller O, Gan J, Mao J, Pfahlberg AB, et al. Randomized trial of acupuncture to lower blood pressure.[see comment]. *Circulation* 2007;115:3121-9.
119. Fonseca EB, Celik E, Parra M, Singh M, Nicolaides KH, Fetal Medicine Foundation Second Trimester Screening G. Progesterone and the risk of preterm birth among women with a short cervix.[see comment]. *N Engl J Med* 2007;357:462-9.
120. Ford I, Murray H, Packard CJ, Shepherd J, Macfarlane PW, Cobbe SM, et al. Long-term follow-up of the west of scotland coronary prevention study.[see comment]. *N Engl J Med* 2007;357:1477-86.
121. Foss NB, Kristensen BB, Bundgaard M, Bak M, Heiring C, Virkelyst C, et al. Fascia iliaca compartment blockade for acute pain control in hip fracture patients: A randomized, placebo-controlled trial. *Anesthesiology* 2007;106:773-8.
122. Foster NE, Thomas E, Barlas P, Hill JC, Young J, Mason E, et al. Acupuncture as an adjunct to exercise based physiotherapy for

- osteoarthritis of the knee: Randomised controlled trial. *BMJ* 2007;335:436.
123. Fox KA, Bassand JP, Mehta SR, Wallentin L, Theroux P, Piegas LS, et al. Influence of renal function on the efficacy and safety of fondaparinux relative to enoxaparin in non ST-segment elevation acute coronary syndromes. *Ann Intern Med* 2007;147:304-10.
  124. Francois B, Bellissant E, Gissot V, Desachy A, Normand S, Boulain T, et al. 12-h pretreatment with methylprednisolone versus placebo for prevention of postextubation laryngeal oedema: A randomised double-blind trial. *Lancet* 2007;369:1083-9.
  125. Frank E, Kupfer DJ, Buysse DJ, Swartz HA, Pilkonis PA, Houck PR, et al. Randomized trial of weekly, twice-monthly, and monthly interpersonal psychotherapy as maintenance treatment for women with recurrent depression.[see comment]. *Am J Psychiatry* 2007;164:761-7.
  126. Future II Study Group. Quadrivalent vaccine against human papillomavirus to prevent high-grade cervical lesions.[see comment]. *N Engl J Med* 2007;356:1915-27.
  127. Gacci M, Del Popolo G, Macchiarella A, Celso M, Vittori G, Lapini A, et al. Vardenafil improves urodynamic parameters in men with spinal cord injury: Results from a single dose, pilot study. *J Urol* 2007;178:2040-3; discussion 44.
  128. Gallo JJ, Bogner HR, Morales KH, Post EP, Lin JY, Bruce ML. The effect of a primary care practice-based depression intervention on mortality in older adults: A randomized trial.[summary for patients in ann intern med. 2007 may 15;146(10):138; pmid: 17502628]. *Ann Intern Med* 2007;146:689-98.
  129. Gan TJ, Apfel CC, Kovac A, Philip BK, Singla N, Minkowitz H, et al. A randomized, double-blind comparison of the nk1 antagonist, aprepitant, versus ondansetron for the prevention of postoperative nausea and vomiting. *Ambulatory Analgesia* 2007;104:1082-9.
  130. Gandhi GY, Nuttall GA, Abel MD, Mullany CJ, Schaff HV, O'Brien PC, et al. Intensive intraoperative insulin therapy versus conventional glucose management during cardiac surgery: A randomized trial.[see comment]. *Ann Intern Med* 2007;146:233-43.
  131. Gardner CD, Kiazand A, Alhassan S, Kim S, Stafford RS, Balise RR, et al. Comparison of the atkins, zone, ornish, and learn diets for change in weight and related risk factors among overweight premenopausal women: The a to z weight loss study: A randomized trial. *JAMA* 2007;297:969-77.
  132. Garg A, Butz AM, Dworkin PH, Lewis RA, Thompson RE, Serwint JR. Improving the management of family psychosocial problems at low-income children's well-child care visits: The we care project. *Pediatrics* 2007;120:547-58.
  133. Garland SM, Hernandez-Avila M, Wheeler CM, Perez G, Harper DM, Leodolter S, et al. Quadrivalent vaccine against human papillomavirus to prevent anogenital diseases.[see comment]. *N Engl J Med* 2007;356:1928-43.
  134. Geohas J, Daly A, Juturu V, Finch M, Komorowski JR. Chromium picolinate and biotin combination reduces atherogenic index of plasma in patients with type 2 diabetes mellitus: A placebo-controlled, double-blinded, randomized clinical trial. *Am J Med Sci* 2007;333:145-53.
  135. Gheorghide M, Konstam MA, Burnett JC, Jr., Grinfeld L, Maggioni AP, Swedberg K, et al. Short-term clinical effects of tolvaptan, an oral vasopressin antagonist, in patients hospitalized for heart failure: The everest clinical status trials.[see comment]. *JAMA* 2007;297:1332-43.
  136. Gilligan D, Nicolson M, Smith I, Groen H, Dalesio O, Goldstraw P, et al. Preoperative chemotherapy in patients with resectable non-small cell lung cancer: Results of the mrc lu22/nvalt 2/eortc 08012 multicentre randomised trial and update of systematic review.[see comment]. *Lancet* 2007;369:1929-37.
  137. Giugliano RP, Wiviott SD, Stone PH, Simon DI, Schweiger MJ, Bouchard A, et al. Recombinant nematode anticoagulant protein c2 in



- patients with non-st-segment elevation acute coronary syndrome: The anthem-timi-32 trial. *J Am Coll Cardiol* 2007;49:2398-407.
138. Glazebrook C, Marlow N, Israel C, Croudace T, Johnson S, White IR, et al. Randomised trial of a parenting intervention during neonatal intensive care.[see comment]. *Archives of Disease in Childhood Fetal & Neonatal Edition* 2007;92:F438-43.
  139. Glynn RJ, Ridker PM, Goldhaber SZ, Buring JE. Effect of low-dose aspirin on the occurrence of venous thromboembolism: A randomized trial.[summary for patients in ann intern med. 2007 oct 16;147(8):I34; pmid: 17938386]. *Ann Intern Med* 2007;147:525-33.
  140. Gohel MS, Barwell JR, Taylor M, Chant T, Foy C, Earnshaw JJ, et al. Long term results of compression therapy alone versus compression plus surgery in chronic venous ulceration (eschar): Randomised controlled trial.[see comment]. *BMJ* 2007;335:83.
  141. Goodyer I, Dubicka B, Wilkinson P, Kelvin R, Roberts C, Byford S, et al. Selective serotonin reuptake inhibitors (ssris) and routine specialist care with and without cognitive behaviour therapy in adolescents with major depression: Randomised controlled trial.[see comment]. *BMJ* 2007;335:142.
  142. Gottlieb SS, Kop WJ, Thomas SA, Katzen S, Vesely MR, Greenberg N, et al. A double-blind placebo-controlled pilot study of controlled-release paroxetine on depression and quality of life in chronic heart failure. *Am Heart J* 2007;153:868-73.
  143. Gray RH, Kigozi G, Serwadda D, Makumbi F, Watya S, Nalugoda F, et al. Male circumcision for hiv prevention in men in rakai, uganda: A randomised trial.[see comment]. *Lancet* 2007;369:657-66.
  144. Greenfield JM, Shah SJ, Levine LA. Verapamil versus saline in electromotive drug administration for peyronie's disease: A double-blind, placebo controlled trial. *J Urol* 2007;177:972-5.
  145. Greenland KB, Liu G, Tan H, Edwards M, Irwin MG. Comparison of the levitan fps scope and the single-use bougie for simulated difficult intubation in anaesthetised patients. *Anaesthesia* 2007;62:509-15.
  146. Greenspan SL, Bone HG, Ettinger MP, Hanley DA, Lindsay R, Zanchetta JR, et al. Effect of recombinant human parathyroid hormone (1-84) on vertebral fracture and bone mineral density in postmenopausal women with osteoporosis: A randomized trial.[summary for patients in ann intern med. 2007 mar 6;146(5):I20; pmid: 17339614]. *Ann Intern Med* 2007;146:326-39.
  147. Greenspan SL, Nelson JB, Trump DL, Resnick NM. Effect of once-weekly oral alendronate on bone loss in men receiving androgen deprivation therapy for prostate cancer: A randomized trial.[summary for patients in ann intern med. 2007 mar 20;146(6):I72; pmid: 17371883]. *Ann Intern Med* 2007;146:416-24.
  148. Greeven A, van Balkom AJ, Visser S, Merkelbach JW, van Rood YR, van Dyck R, et al. Cognitive behavior therapy and paroxetine in the treatment of hypochondriasis: A randomized controlled trial.[see comment]. *Am J Psychiatry* 2007;164:91-9.
  149. Griffiths C, Sturdy P, Brewin P, Bothamley G, Eldridge S, Martineau A, et al. Educational outreach to promote screening for tuberculosis in primary care: A cluster randomised controlled trial. *Lancet* 2007;369:1528-34.
  150. Grinsztejn B, Nguyen BY, Katlama C, Gatell JM, Lazzarin A, Vittecoq D, et al. Safety and efficacy of the hiv-1 integrase inhibitor raltegravir (mk-0518) in treatment-experienced patients with multidrug-resistant virus: A phase ii randomised controlled trial.[see comment]. *Lancet* 2007;369:1261-9.
  151. Grobusch MP, Lell B, Schwarz NG, Gabor J, Dornemann J, Potschke M, et al. Intermittent preventive treatment against malaria in infants in gabon--a randomized, double-blind, placebo-controlled trial. *J Infect Dis* 2007;196:1595-602.
  152. Guarino MP, Cong P, Cicala M, Alloni R, Carotti S, Behar J. Ursodeoxycholic acid improves muscle contractility and inflammation in symptomatic gallbladders with cholesterol gallstones. *Gut* 2007;56:815-20.

153. Guazzi M, Samaja M, Arena R, Vicenzi M, Guazzi MD. Long-term use of sildenafil in the therapeutic management of heart failure.[see comment]. *J Am Coll Cardiol* 2007;50:2136-44.
154. Gudziol V, Muck-Weymann M, Seizinger O, Rauh R, Siffert W, Hummel T. Sildenafil affects olfactory function. *J Urol* 2007;177:258-61; discussion 61.
155. Gupta D, Earley MJ, Haywood GA, Richmond L, Fitzgerald M, Kojodjojo P, et al. Can atrial fibrillation with a coarse electrocardiographic appearance be treated with catheter ablation of the tricuspid valve-inferior vena cava isthmus? Results of a multicentre randomised controlled trial. *Heart* 2007;93:688-93.
156. Gurbel PA, Bliden KP, DiChiara J, Newcomer J, Weng W, Neerchal NK, et al. Evaluation of dose-related effects of aspirin on platelet function: Results from the aspirin-induced platelet effect (aspet) study. *Circulation* 2007;115:3156-64.
157. Halonen J, Halonen P, Jarvinen O, Taskinen P, Auvinen T, Tarkka M, et al. Corticosteroids for the prevention of atrial fibrillation after cardiac surgery: A randomized controlled trial. *JAMA* 2007;297:1562-7.
158. Hamar BD, Saber SB, Cackovic M, Magloire LK, Pettker CM, Abdel-Razeq SS, et al. Ultrasound evaluation of the uterine scar after cesarean delivery: A randomized controlled trial of one- and two-layer closure. *Obstet Gynecol* 2007;110:808-13.
159. Hancock MJ, Maher CG, Latimer J, McLachlan AJ, Cooper CW, Day RO, et al. Assessment of diclofenac or spinal manipulative therapy, or both, in addition to recommended first-line treatment for acute low back pain: A randomised controlled trial.[see comment]. *Lancet* 2007;370:1638-43.
160. Han-Geurts IJ, Hop WC, Verhoef C, Tran KT, Tilanus HW. Randomized clinical trial comparing feeding jejunostomy with nasoduodenal tube placement in patients undergoing oesophagectomy. *Br J Surg* 2007;94:31-5.
161. Hansen CT, Sorensen M, Moller C, Ottesen B, Kehlet H. Effect of laxatives on gastrointestinal functional recovery in fast-track hysterectomy: A double-blind, placebo-controlled randomized study. *Am J Obstet Gynecol* 2007;196:311.e1-7.
162. Hausenloy DJ, Mwamure PK, Venugopal V, Harris J, Barnard M, Grundy E, et al. Effect of remote ischaemic preconditioning on myocardial injury in patients undergoing coronary artery bypass graft surgery: A randomised controlled trial.[see comment]. *Lancet* 2007;370:575-9.
163. Hayward K, Campbell-Yeo M, Price S, Morrison D, Whyte R, Cake H, et al. Co-bedding twins: How pilot study findings guided improvements in planning a larger multicenter trial. *Nurs Res* 2007;56:137-43.
164. Heijnen EM, Eijkemans MJ, De Klerk C, Polinder S, Beckers NG, Klinkert ER, et al. A mild treatment strategy for in-vitro fertilisation: A randomised non-inferiority trial.[see comment]. *Lancet* 2007;369:743-9.
165. Heimstad R, Skogvoll E, Mattsson LA, Johansen OJ, Eik-Nes SH, Salvesen KA. Induction of labor or serial antenatal fetal monitoring in postterm pregnancy: A randomized controlled trial. *Obstet Gynecol* 2007;109:609-17.
166. Henderson M, Wight D, Raab GM, Abraham C, Parkes A, Scott S, et al. Impact of a theoretically based sex education programme (share) delivered by teachers on nhs registered conceptions and terminations: Final results of cluster randomised trial.[see comment]. *BMJ* 2007;334:133.
167. Hendrickson S, Mattes R. Financial incentive for diet recall accuracy does not affect reported energy intake or number of underreporters in a sample of overweight females. *J Am Diet Assoc* 2007;107:118-21.
168. Herroeder S, Pecher S, Schonherr ME, Kaulitz G, Hahnenkamp K, Friess H, et al. Systemic lidocaine shortens length of hospital stay after colorectal surgery: A double-blinded, randomized, placebo-controlled trial. *Ann Surg* 2007;246:192-200.

169. Heyde GS, Koch KT, de Winter RJ, Dijkgraaf MG, Klees MI, Dijkman LM, et al. Randomized trial comparing same-day discharge with overnight hospital stay after percutaneous coronary intervention: Results of the elective pci in outpatient study (epos).[see comment]. *Circulation* 2007;115:2299-306.
170. Hickson M, D'Souza AL, Muthu N, Rogers TR, Want S, Rajkumar C, et al. Use of probiotic lactobacillus preparation to prevent diarrhoea associated with antibiotics: Randomised double blind placebo controlled trial. *BMJ* 2007;335:80.
171. Hill AM, Buckley JD, Murphy KJ, Howe PR. Combining fish-oil supplements with regular aerobic exercise improves body composition and cardiovascular disease risk factors. *Am J Clin Nutr* 2007;85:1267-74.
172. Hill N, Lenglet A, Arnez AM, Carneiro I. Plant based insect repellent and insecticide treated bed nets to protect against malaria in areas of early evening biting vectors: Double blind randomised placebo controlled clinical trial in the bolivian amazon.[see comment]. *BMJ* 2007;335:1023.
173. Hirsch A, Windhausen F, Tijssen JG, Verheugt FW, Cornel JH, de Winter RJ, et al. Long-term outcome after an early invasive versus selective invasive treatment strategy in patients with non-st-elevation acute coronary syndrome and elevated cardiac troponin t (the ictus trial): A follow-up study.[see comment]. *Lancet* 2007;369:827-35.
174. Holland R, Brooksby I, Lenaghan E, Ashton K, Hay L, Smith R, et al. Effectiveness of visits from community pharmacists for patients with heart failure: Heartmed randomised controlled trial.[see comment]. *BMJ* 2007;334:1098.
175. Holman RR, Thorne KI, Farmer AJ, Davies MJ, Keenan JF, Paul S, et al. Addition of biphasic, prandial, or basal insulin to oral therapy in type 2 diabetes.[see comment]. *N Engl J Med* 2007;357:1716-30.
176. Home PD, Pocock SJ, Beck-Nielsen H, Gomis R, Hanefeld M, Jones NP, et al. Rosiglitazone evaluated for cardiovascular outcomes--an interim analysis.[see comment]. *N Engl J Med* 2007;357:28-38.
177. Hopkins WJ, Elkahwaji J, Beierle LM, Levenson GE, Uehling DT. Vaginal mucosal vaccine for recurrent urinary tract infections in women: Results of a phase 2 clinical trial. *J Urol* 2007;177:1349-53; quiz 591.
178. Howard RJ, Juszczak E, Ballard CG, Bentham P, Brown RG, Bullock R, et al. Donepezil for the treatment of agitation in alzheimer's disease.[see comment]. *N Engl J Med* 2007;357:1382-92.
179. Howden-Chapman P, Matheson A, Crane J, Viggers H, Cunningham M, Blakely T, et al. Effect of insulating existing houses on health inequality: Cluster randomised study in the community.[see comment]. *BMJ* 2007;334:460.
180. Hsia J, Heiss G, Ren H, Allison M, Dolan NC, Greenland P, et al. Calcium/vitamin d supplementation and cardiovascular events.[see comment]. *Circulation* 2007;115:846-54.
181. Hudes G, Carducci M, Tomczak P, Dutcher J, Figlin R, Kapoor A, et al. Temsirolimus, interferon alfa, or both for advanced renal-cell carcinoma. *N Engl J Med* 2007;356:2271-81.
182. Huf G, Coutinho ES, Adams CE, Group TC. Rapid tranquillisation in psychiatric emergency settings in brazil: Pragmatic randomised controlled trial of intramuscular haloperidol versus intramuscular haloperidol plus promethazine.[see comment]. *BMJ* 2007;335:869.
183. Huybregts RA, Morariu AM, Rakhorst G, Spiegelenberg SR, Romijn HW, de Vroege R, et al. Attenuated renal and intestinal injury after use of a mini-cardiopulmonary bypass system.[see comment]. *Ann Thorac Surg* 2007;83:1760-6.
184. Iijima T, Ishiyama T, Kashimoto S, Yamaguchi T, Andoh T, Hanawa K, et al. A comparison of three different concentrations of ropivacaine with fentanyl for patient-controlled epidural analgesia. *Anesth Analg* 2007;105:507-11.
185. Immenroth M, Burger T, Brenner J, Nagelschmidt M, Eberspacher H, Troidl H. Mental training in surgical education: A randomized

- controlled trial. *Ann Surg* 2007;245:385-91.
186. Isenring EA, Bauer JD, Capra S. Nutrition support using the american dietetic association medical nutrition therapy protocol for radiation oncology patients improves dietary intake compared with standard practice.[see comment]. *J Am Diet Assoc* 2007;107:404-12.
  187. Itoi E, Hatakeyama Y, Sato T, Kido T, Minagawa H, Yamamoto N, et al. Immobilization in external rotation after shoulder dislocation reduces the risk of recurrence. A randomized controlled trial. *Journal of Bone & Joint Surgery - American Volume* 2007;89:2124-31.
  188. Jaccard A, Moreau P, Leblond V, Leleu X, Benboubker L, Hermine O, et al. High-dose melphalan versus melphalan plus dexamethasone for al amyloidosis. *N Engl J Med* 2007;357:1083-93.
  189. James J, Thomas P, Kerr D. Preventing childhood obesity: Two year follow-up results from the christchurch obesity prevention programme in schools (chopps).[see comment]. *BMJ* 2007;335:762.
  190. Jamison RL, Hartigan P, Kaufman JS, Goldfarb DS, Warren SR, Guarino PD, et al. Effect of homocysteine lowering on mortality and vascular disease in advanced chronic kidney disease and end-stage renal disease: A randomized controlled trial.[see comment]. *JAMA* 2007;298:1163-70.
  191. Jannelli ML, Wu JM, Plunkett LW, Williams KS, Visco AG. A randomized controlled trial of clean intermittent self-catheterization versus suprapubic catheterization after urogynecologic surgery. *Am J Obstet Gynecol* 2007;197:72.e1-4.
  192. Jeschke MG, Finnerty CC, Suman OE, Kulp G, Mlcak RP, Herndon DN. The effect of oxandrolone on the endocrinologic, inflammatory, and hypermetabolic responses during the acute phase postburn. *Ann Surg* 2007;246:351-60; discussion 60-2.
  193. Jeschke MG, Norbury WB, Finnerty CC, Branski LK, Herndon DN. Propranolol does not increase inflammation, sepsis, or infectious episodes in severely burned children. *Journal of Trauma-Injury Infection & Critical Care* 2007;62:676-81.
  194. Jialal I, Miguelino E, Griffen SC, Devaraj S. Concomitant reduction of low-density lipoprotein-cholesterol and biomarkers of inflammation with low-dose simvastatin therapy in patients with type 1 diabetes. *J Clin Endocrinol Metab* 2007;92:3136-40.
  195. John B, Suri I, Hillermann C, Mendonca C. Comparison of cricothyroidotomy on manikin vs. Simulator: A randomised cross-over study. *Anaesthesia* 2007;62:1029-32.
  196. Johnson BA, Rosenthal N, Capece JA, Wiegand F, Mao L, Beyers K, et al. Topiramate for treating alcohol dependence: A randomized controlled trial.[see comment]. *JAMA* 2007;298:1641-51.
  197. Johnston CA, Tyler C, McFarlin BK, Poston WS, Haddock CK, Reeves R, et al. Weight loss in overweight mexican american children: A randomized, controlled trial. *Pediatrics* 2007;120:e1450-7.
  198. Jonker DJ, O'Callaghan CJ, Karapetis CS, Zalcborg JR, Tu D, Au HJ, et al. Cetuximab for the treatment of colorectal cancer. *N Engl J Med* 2007;357:2040-8.
  199. Jonnavithula N, Durga P, Kulkarni DK, Ramachandran G. Bilateral intra-oral, infra-orbital nerve block for postoperative analgesia following cleft lip repair in paediatric patients: Comparison of bupivacaine vs bupivacaine-pethidine combination. *Anaesthesia* 2007;62:581-5.
  200. Kaiser HB, Naclerio RM, Given J, Toler TN, Ellsworth A, Philpot EE. Fluticasone furoate nasal spray: A single treatment option for the symptoms of seasonal allergic rhinitis.[see comment]. *J Allergy Clin Immunol* 2007;119:1430-7.
  201. Kaiser PK, Brown DM, Zhang K, Hudson HL, Holz FG, Shapiro H, et al. Ranibizumab for predominantly classic neovascular age-related macular degeneration: Subgroup analysis of first-year anchor results. *Am J Ophthalmol* 2007;144:850-57.

202. Kamm MA, Sandborn WJ, Gassull M, Schreiber S, Jackowski L, Butler T, et al. Once-daily, high-concentration mmx mesalamine in active ulcerative colitis. *Gastroenterology* 2007;132:66-75; quiz 432-3.
203. Kappos L, Freedman MS, Polman CH, Edan G, Hartung HP, Miller DH, et al. Effect of early versus delayed interferon beta-1b treatment on disability after a first clinical event suggestive of multiple sclerosis: A 3-year follow-up analysis of the benefit study.[see comment]. *Lancet* 2007;370:389-97.
204. Karolak W, Hirsch G, Buth K, Legare JF. Medium-term outcomes of coronary artery bypass graft surgery on pump versus off pump: Results from a randomized controlled trial. *Am Heart J* 2007;153:689-95.
205. Kastelein JJ, van Leuven SI, Burgess L, Evans GW, Kuivenhoven JA, Barter PJ, et al. Effect of torcetrapib on carotid atherosclerosis in familial hypercholesterolemia. *N Engl J Med* 2007;356:1620-30.
206. Keech AC, Mitchell P, Summanen PA, O'Day J, Davis TM, Moffitt MS, et al. Effect of fenofibrate on the need for laser treatment for diabetic retinopathy (field study): A randomised controlled trial.[see comment]. *Lancet* 2007;370:1687-97.
207. Keefe RS, Sweeney JA, Gu H, Hamer RM, Perkins DO, McEvoy JP, et al. Effects of olanzapine, quetiapine, and risperidone on neurocognitive function in early psychosis: A randomized, double-blind 52-week comparison.[see comment]. *Am J Psychiatry* 2007;164:1061-71.
208. Keime-Guibert F, Chinot O, Taillandier L, Cartalat-Carel S, Frenay M, Kantor G, et al. Radiotherapy for glioblastoma in the elderly.[see comment]. *N Engl J Med* 2007;356:1527-35.
209. Kemeny ME, Rosenwasser LJ, Panettieri RA, Rose RM, Berg-Smith SM, Kline JN. Placebo response in asthma: A robust and objective phenomenon. *J Allergy Clin Immunol* 2007;119:1375-81.
210. Kempainen RR, Williams CB, Hazelwood A, Rubin BK, Milla CE. Comparison of high-frequency chest wall oscillation with differing waveforms for airway clearance in cystic fibrosis. *Chest* 2007;132:1227-32.
211. Keramidas EG, Rodopoulou SG. Ropivacaine versus lidocaine in digital nerve blocks: A prospective study. *Plast Reconstr Surg* 2007;119:2148-52.
212. Khan MS, Dar O, Sismanidis C, Shah K, Godfrey-Faussett P. Improvement of tuberculosis case detection and reduction of discrepancies between men and women by simple sputum-submission instructions: A pragmatic randomised controlled trial.[see comment]. *Lancet* 2007;369:1955-60.
213. Khanal S, Obeidat O, Hudson MP, Al-Mallah M, Bloome M, Lu M, et al. Active lipid management in coronary artery disease (almicad) study. *Am J Med* 2007;120:734.e11-7.
214. Khoo CK, Vickery CJ, Forsyth N, Vinall NS, Eyre-Brook IA. A prospective randomized controlled trial of multimodal perioperative management protocol in patients undergoing elective colorectal resection for cancer. *Ann Surg* 2007;245:867-72.
215. Khoury J, Henriksen T, Seljeflot I, Morkrid L, Frosli KF, Tonstad S. Effects of an antiatherogenic diet during pregnancy on markers of maternal and fetal endothelial activation and inflammation: The carrdip study. *BJOG: An International Journal of Obstetrics & Gynaecology* 2007;114:279-88.
216. Kianifard B, Holdstock J, Allen C, Smith C, Price B, Whiteley MS. Randomized clinical trial of the effect of adding subfascial endoscopic perforator surgery to standard great saphenous vein stripping. *Br J Surg* 2007;94:1075-80.
217. Kim F, Olsufka M, Longstreth WT, Jr., Maynard C, Carlbom D, Deem S, et al. Pilot randomized clinical trial of prehospital induction of mild hypothermia in out-of-hospital cardiac arrest patients with a rapid infusion of 4 degrees c normal saline. *Circulation*

- 2007;115:3064-70.
218. Kim LG, RA PS, Ashton HA, Thompson SG, Multicentre Aneurysm Screening Study G. A sustained mortality benefit from screening for abdominal aortic aneurysm.[see comment]. *Ann Intern Med* 2007;146:699-706.
  219. Kimberger O, Illievich U, Lenhardt R. The effect of skin surface warming on pre-operative anxiety in neurosurgery patients. *Anaesthesia* 2007;62:140-5.
  220. Kitakaze M, Asakura M, Kim J, Shintani Y, Asanuma H, Hamasaki T, et al. Human atrial natriuretic peptide and nicorandil as adjuncts to reperfusion treatment for acute myocardial infarction (j-wind): Two randomised trials.[see comment]. *Lancet* 2007;370:1483-93.
  221. Kjekshus J, Apetrei E, Barrios V, Bohm M, Cleland JG, Cornel JH, et al. Rosuvastatin in older patients with systolic heart failure.[see comment]. *N Engl J Med* 2007;357:2248-61.
  222. Klinnert MD, Liu AH, Pearson MR, Tong S, Strand M, Luckow A, et al. Outcome of a randomized multifaceted intervention with low-income families of wheezing infants. *Arch Pediatr Adolesc Med* 2007;161:783-90.
  223. Koc S, Memis D, Sut N. The preoperative use of gabapentin, dexamethasone, and their combination in varicocele surgery: A randomized controlled trial. *Anesth Analg*;105:1137-42.
  224. Kocher MS, Kasser JR, Waters PM, Bae D, Snyder BD, Hresko MT, et al. Lateral entry compared with medial and lateral entry pin fixation for completely displaced supracondylar humeral fractures in children. A randomized clinical trial. *Journal of Bone & Joint Surgery - American Volume* 2007;89:706-12.
  225. Kochiadakis GE, Igoumenidis NE, Hamilos ME, Marketou ME, Chlouverakis GI, Vardas PE. A comparative study of the efficacy and safety of procainamide versus propafenone versus amiodarone for the conversion of recent-onset atrial fibrillation. *Am J Cardiol* 2007;99:1721-5.
  226. Koh TH, Butow PN, Coory M, Budge D, Collie LA, Whitehall J, et al. Provision of taped conversations with neonatologists to mothers of babies in intensive care: Randomised controlled trial.[see comment]. *BMJ* 2007;334:28.
  227. Kondo H, Kanematsu M, Goshima S, Miyoshi T, Shiratori Y, Onozuka M, et al. Mdct of the pancreas: Optimizing scanning delay with a bolus-tracking technique for pancreatic, peripancreatic vascular, and hepatic contrast enhancement. *Ajr* 2007;American Journal of Roentgenology. 188:751-6.
  228. Konduri GG, Vohr B, Robertson C, Sokol GM, Solimano A, Singer J, et al. Early inhaled nitric oxide therapy for term and near-term newborn infants with hypoxic respiratory failure: Neurodevelopmental follow-up. *J Pediatr*;150:235-40.
  229. Konstam MA, Gheorghide M, Burnett JC, Jr., Grinfeld L, Maggioni AP, Swedberg K, et al. Effects of oral tolvaptan in patients hospitalized for worsening heart failure: The everest outcome trial.[see comment]. *JAMA* 2007;297:1319-31.
  230. Koo B-K, Kim Y-S, Park K-W, Yang H-M, Kwon D-A, Chung J-W, et al. Effect of celecoxib on restenosis after coronary angioplasty with a taxus stent (corea-taxus trial): An open-label randomised controlled study.[see comment]. *Lancet* 2007;370:567-74.
  231. Kool J, Bachmann S, Oesch P, Knuesel O, Ambergen T, de Bie R, et al. Function-centered rehabilitation increases work days in patients with nonacute nonspecific low back pain: 1-year results from a randomized controlled trial. *Arch Phys Med Rehabil* 2007;88:1089-94.
  232. Kottink AI, Hermens HJ, Nene AV, Tenniglo MJ, van der Aa HE, Buschman HP, et al. A randomized controlled trial of an implantable 2-channel peroneal nerve stimulator on walking speed and activity in poststroke hemiplegia. *Arch Phys Med Rehabil* 2007;88:971-8.
  233. Kramer MS, Matush L, Vanilovich I, Platt R, Bogdanovich N, Sevkovskaya Z, et al. Effect of prolonged and exclusive breast feeding

- on risk of allergy and asthma: Cluster randomised trial.[see comment]. *BMJ* 2007;335:815.
234. Krueger GG, Langley RG, Leonardi C, Yeilding N, Guzzo C, Wang Y, et al. A human interleukin-12/23 monoclonal antibody for the treatment of psoriasis. *N Engl J Med* 2007;356:580-92.
235. Krupitsky EM, Neznanova O, Masalov D, Burakov AM, Didenko T, Romanova T, et al. Effect of memantine on cue-induced alcohol craving in recovering alcohol-dependent patients. *Am J Psychiatry* 2007;164:519-23.
236. Kuppermann BD, Blumenkranz MS, Haller JA, Williams GA, Weinberg DV, Chou C, et al. Randomized controlled study of an intravitreal dexamethasone drug delivery system in patients with persistent macular edema. *Arch Ophthalmol* 2007;125:309-17.
237. Kuse ER, Chetchotisakd P, da Cunha CA, Ruhnke M, Barrios C, Raghunadharao D, et al. Micafungin versus liposomal amphotericin b for candidaemia and invasive candidosis: A phase iii randomised double-blind trial. *Lancet* 2007;369:1519-27.
238. Lacroix J, Hebert PC, Hutchison JS, Hume HA, Tucci M, Ducruet T, et al. Transfusion strategies for patients in pediatric intensive care units.[see comment]. *N Engl J Med* 2007;356:1609-19.
239. Landry M-A, Lafrenaye S, Roy M-C, Cyr C. A randomized, controlled trial of bedside versus conference-room case presentation in a pediatric intensive care unit. *Pediatrics* 2007;120:275-80.
240. Larsen CM, Faulenbach M, Vaag A, Volund A, Ehres JA, Seifert B, et al. Interleukin-1-receptor antagonist in type 2 diabetes mellitus.[see comment]. *N Engl J Med* 2007;356:1517-26.
241. Lau JY, Leung WK, Wu JC, Chan FK, Wong VW, Chiu PW, et al. Omeprazole before endoscopy in patients with gastrointestinal bleeding. *N Engl J Med* 2007;356:1631-40.
242. Lautrette A, Darmon M, Megarbane B, Joly LM, Chevret S, Adrie C, et al. A communication strategy and brochure for relatives of patients dying in the icu.[see comment]. *N Engl J Med* 2007;356:469-78.
243. Lazzarin A, Campbell T, Clotet B, Johnson M, Katlama C, Moll A, et al. Efficacy and safety of tmc125 (etravirine) in treatment-experienced hiv-1-infected patients in duet-2: 24-week results from a randomised, double-blind, placebo-controlled trial.[see comment]. *Lancet* 2007;370:39-48.
244. Leardi S, Pietroletti R, Angeloni G, Necozone S, Ranalletta G, Del Gusto B. Randomized clinical trial examining the effect of music therapy in stress response to day surgery. *Br J Surg* 2007;94:943-7.
245. Lee SJ, Detels R, Rotheram-Borus MJ, Duan N. The effect of social support on mental and behavioral outcomes among adolescents with parents with hiv/aids.[see comment]. *Am J Public Health* 2007;97:1820-6.
246. Legro RS, Barnhart HX, Schlaff WD, Carr BR, Diamond MP, Carson SA, et al. Clomiphene, metformin, or both for infertility in the polycystic ovary syndrome.[see comment]. *N Engl J Med* 2007;356:551-66.
247. Leslie T, Mayan MI, Hasan MA, Safi MH, Klinkenberg E, Whitty CJ, et al. Sulfadoxine-pyrimethamine, chlorproguanil-dapsone, or chloroquine for the treatment of plasmodium vivax malaria in afghanistan and pakistan: A randomized controlled trial. *JAMA* 2007;297:2201-9.
248. Lesperance F, Frasere-Smith N, Koszycki D, Laliberte MA, van Zyl LT, Baker B, et al. Effects of citalopram and interpersonal psychotherapy on depression in patients with coronary artery disease: The canadian cardiac randomized evaluation of antidepressant and psychotherapy efficacy (create) trial.[see comment]. *JAMA* 2007;297:367-79.
249. Levin NW, Fishbane S, Canedo FV, Zeig S, Nassar GM, Moran JE, et al. Intravenous methoxy polyethylene glycol-epoetin beta for haemoglobin control in patients with chronic kidney disease who are on dialysis: A randomised non-inferiority trial (maxima).[see

- comment][erratum appears in lancet. 2008 feb 2;371(9610):386]. *Lancet* 2007;370:1415-21.
250. Levy HL, Milanowski A, Chakrapani A, Cleary M, Lee P, Trefz FK, et al. Efficacy of sapropterin dihydrochloride (tetrahydrobiopterin, 6r-bh4) for reduction of phenylalanine concentration in patients with phenylketonuria: A phase iii randomised placebo-controlled study. *Lancet* 2007;370:504-10.
251. Lilleri D, Gerna G, Furione M, Bernardo ME, Giorgiani G, Telli S, et al. Use of a dnaemia cut-off for monitoring human cytomegalovirus infection reduces the number of preemptively treated children and young adults receiving hematopoietic stem-cell transplantation compared with qualitative pp65 antigenemia. *Blood* 2007;110:2757-60.
252. Llanos-Cuentas A, Echevarria J, Seas C, Chang E, Cruz M, Alvarez E, et al. Parenteral aminosidine is not effective for peruvian mucocutaneous leishmaniasis. *Am J Trop Med Hyg* 2007;76:1128-31.
253. Longobardi G, Corbi G, Cacciatore F, Abete P, Furgi G, Vitale DF, et al. Effect of losartan in treatment of exercise-induced myocardial ischemia. *Am J Cardiol* 2007;100:1517-21.
254. Lukaszuk JM, Luebbers P, Gordon BA. Preliminary study: Soy milk as effective as skim milk in promoting weight loss. *J Am Diet Assoc* 2007;107:1811-4.
255. Lunde K, Solheim S, Aakhus S, Arnesen H, Moum T, Abdelnoor M, et al. Exercise capacity and quality of life after intracoronary injection of autologous mononuclear bone marrow cells in acute myocardial infarction: Results from the autologous stem cell transplantation in acute myocardial infarction (astami) randomized controlled trial. *Am Heart J* 2007;154:710.e1-8.
256. Luo W, Li B, Lin G, Huang R. Postconditioning in cardiac surgery for tetralogy of fallot. *J Thorac Cardiovasc Surg* 2007;133:1373-4.
257. Madruga JV, Berger D, McMurchie M, Suter F, Banhegyi D, Ruxrungtham K, et al. Efficacy and safety of darunavir-ritonavir compared with that of lopinavir-ritonavir at 48 weeks in treatment-experienced, hiv-infected patients in titan: A randomised controlled phase iii trial.[see comment]. *Lancet* 2007;370:49-58.
258. Madruga JV, Cahn P, Grinsztejn B, Haubrich R, Lalezari J, Mills A, et al. Efficacy and safety of tmc125 (etravirine) in treatment-experienced hiv-1-infected patients in duet-1: 24-week results from a randomised, double-blind, placebo-controlled trial.[see comment]. *Lancet* 2007;370:29-38.
259. Maharaj CH, Buckley E, Harte BH, Laffey JG. Endotracheal intubation in patients with cervical spine immobilization: A comparison of macintosh and airtraq laryngoscopes. *Anesthesiology* 2007;107:53-9.
260. Mahmoud RA, Pandina GJ, Turkoz I, Kosik-Gonzalez C, Canuso CM, Kujawa MJ, et al. Risperidone for treatment-refractory major depressive disorder: A randomized trial.[summary for patients in ann intern med. 2007 nov 6;147(9):I34; pmid: 17975178]. *Ann Intern Med* 2007;147:593-602.
261. Maki PM, Gast MJ, Vieweg AJ, Burriss SW, Yaffe K. Hormone therapy in menopausal women with cognitive complaints: A randomized, double-blind trial. *Neurology* 2007;69:1322-30.
262. Maki-Petaja KM, Booth AD, Hall FC, Wallace SM, Brown J, McEniery CM, et al. Ezetimibe and simvastatin reduce inflammation, disease activity, and aortic stiffness and improve endothelial function in rheumatoid arthritis. *J Am Coll Cardiol* 2007;50:852-8.
263. Malhotra-Kumar S, Lammens C, Coenen S, Van Herck K, Goossens H. Effect of azithromycin and clarithromycin therapy on pharyngeal carriage of macrolide-resistant streptococci in healthy volunteers: A randomised, double-blind, placebo-controlled study.[see comment]. *Lancet* 2007;369:482-90.
264. Man IO, Morrissey MC, Cywinski JK. Effect of neuromuscular electrical stimulation on ankle swelling in the early period after ankle



- sprain. *Phys Ther* 2007;87:53-65.
265. Manco-Johnson MJ, Abshire TC, Shapiro AD, Riske B, Hacker MR, Kilcoyne R, et al. Prophylaxis versus episodic treatment to prevent joint disease in boys with severe hemophilia.[see comment]. *N Engl J Med* 2007;357:535-44.
266. Mant J, Hobbs FDR, Fletcher K, Roalfe A, Fitzmaurice D, Lip GYH, et al. Warfarin versus aspirin for stroke prevention in an elderly community population with atrial fibrillation (the birmingham atrial fibrillation treatment of the aged study, bafta): A randomised controlled trial.[see comment]. *Lancet* 2007;370:493-503.
267. Manzoni P, Stolfi I, Pagni L, Decembrino L, Magnani C, Vetrano G, et al. A multicenter, randomized trial of prophylactic fluconazole in preterm neonates.[see comment]. *N Engl J Med* 2007;356:2483-95.
268. Marini H, Minutoli L, Polito F, Bitto A, Altavilla D, Atteritano M, et al. Effects of the phytoestrogen genistein on bone metabolism in osteopenic postmenopausal women: A randomized trial.[summary for patients in ann intern med. 2007 jun 19;146(12):I34; pmid: 17577001]. *Ann Intern Med* 2007;146:839-47.
269. Mark KE, Corey L, Meng TC, Magaret AS, Huang ML, Selke S, et al. Topical resiquimod 0.01% gel decreases herpes simplex virus type 2 genital shedding: A randomized, controlled trial. *J Infect Dis* 2007;195:1324-31.
270. Martineau AR, Wilkinson RJ, Wilkinson KA, Newton SM, Kampmann B, Hall BM, et al. A single dose of vitamin d enhances immunity to mycobacteria. *Am J Respir Crit Care Med* 2007;176:208-13.
271. Mason S, Knowles E, Colwell B, Dixon S, Wardrope J, Gorringer R, et al. Effectiveness of paramedic practitioners in attending 999 calls from elderly people in the community: Cluster randomised controlled trial.[see comment]. *BMJ* 2007;335:919.
272. Mastenbroek S, Twisk M, van Echten-Arends J, Sikkema-Raddatz B, Korevaar JC, Verhoeve HR, et al. In vitro fertilization with preimplantation genetic screening.[see comment]. *N Engl J Med* 2007;357:9-17.
273. Mayer J, Boldt J, Schellhaass A, Hiller B, Suttner SW. Bispectral index-guided general anesthesia in combination with thoracic epidural analgesia reduces recovery time in fast-track colon surgery. *Anesth Analg*;104:1145-9.
274. Mayer JA, Slymen DJ, Clapp EJ, Pichon LC, Eckhardt L, Eichenfield LF, et al. Promoting sun safety among us postal service letter carriers: Impact of a 2-year intervention. *Am J Public Health* 2007;97:559-65.
275. Mayrand MH, Duarte-Franco E, Rodrigues I, Walter SD, Hanley J, Ferenczy A, et al. Human papillomavirus DNA versus papanicolaou screening tests for cervical cancer.[see comment]. *N Engl J Med* 2007;357:1579-88.
276. McCann D, Barrett A, Cooper A, Crumpler D, Dalen L, Grimshaw K, et al. Food additives and hyperactive behaviour in 3-year-old and 8/9-year-old children in the community: A randomised, double-blinded, placebo-controlled trial.[see comment][erratum appears in lancet. 2007 nov 3;370(9598):1542]. *Lancet* 2007;370:1560-7.
277. McGurk SR, Mueser KT, Feldman K, Wolfe R, Pascaris A. Cognitive training for supported employment: 2-3 year outcomes of a randomized controlled trial.[see comment]. *Am J Psychiatry* 2007;164:437-41.
278. McHutchison JG, Dusheiko G, Shiffman ML, Rodriguez-Torres M, Sigal S, Bourliere M, et al. Eltrombopag for thrombocytopenia in patients with cirrhosis associated with hepatitis c.[see comment]. *N Engl J Med* 2007;357:2227-36.
279. Mebazaa A, Nieminen MS, Packer M, Cohen-Solal A, Kleber FX, Pocock SJ, et al. Levosimendan vs dobutamine for patients with acute decompensated heart failure: The survive randomized trial. *JAMA* 2007;297:1883-91.
280. Michalek-Sauberer A, Heinzl H, Sator-Katzenschlager SM, Monov G, Knolle E, Kress HG. Perioperative auricular electroacupuncture has no effect on pain and analgesic consumption after third molar tooth extraction. *Anesth Analg* 2007;104:542-7.

281. Miller C, Zimmerman L, Barnason S, Nieveen J. Impact of an early recovery management intervention on functioning in postoperative coronary artery bypass patients with diabetes. *Heart Lung* 2007;36:418-30.
282. Miller K, Wang M, Gralow J, Dickler M, Cobleigh M, Perez EA, et al. Paclitaxel plus bevacizumab versus paclitaxel alone for metastatic breast cancer. *N Engl J Med* 2007;357:2666-76.
283. Mittermayer F, Schaller G, Pleiner J, Krzyzanowska K, Kapiotis S, Roden M, et al. Rosiglitazone prevents free fatty acid-induced vascular endothelial dysfunction. *J Clin Endocrinol Metab* 2007;92:2574-80.
284. Mittermayr M, Streif W, Haas T, Fries D, Velik-Salchner C, Klingler A, et al. Hemostatic changes after crystalloid or colloid fluid administration during major orthopedic surgery: The role of fibrinogen administration.[see comment]. *Anesth Analg*;105:905-17.
285. Mochizuki S, Dahlof B, Shimizu M, Ikewaki K, Yoshikawa M, Taniguchi I, et al. Valsartan in a japanese population with hypertension and other cardiovascular disease (jikei heart study): A randomised, open-label, blinded endpoint morbidity-mortality study.[see comment]. *Lancet* 2007;369:1431-9.
286. Moghrabi A, Levy DE, Asselin B, Barr R, Clavell L, Hurwitz C, et al. Results of the dana-farber cancer institute all consortium protocol 95-01 for children with acute lymphoblastic leukemia. *Blood* 2007;109:896-904.
287. Montano M, Flanagan JN, Jiang L, Sebastiani P, Rarick M, LeBrasseur NK, et al. Transcriptional profiling of testosterone-regulated genes in the skeletal muscle of human immunodeficiency virus-infected men experiencing weight loss. *J Clin Endocrinol Metab* 2007;92:2793-802.
288. Montgomery AA, Emmett CL, Fahey T, Jones C, Ricketts I, Patel RR, et al. Two decision aids for mode of delivery among women with previous caesarean section: Randomised controlled trial.[see comment]. *BMJ* 2007;334:1305.
289. Montini G, Toffolo A, Zucchetta P, Dall'Amico R, Gobber D, Calderan A, et al. Antibiotic treatment for pyelonephritis in children: Multicentre randomised controlled non-inferiority trial.[see comment]. *BMJ* 2007;335:386.
290. Montuschi P, Mondino C, Koch P, Ciabattini G, Barnes PJ, Baviera G. Effects of montelukast treatment and withdrawal on fractional exhaled nitric oxide and lung function in children with asthma. *Chest* 2007;132:1876-81.
291. Morice AH, Menon MS, Mulrennan SA, Everett CF, Wright C, Jackson J, et al. Opiate therapy in chronic cough. *Am J Respir Crit Care Med* 2007;175:312-5.
292. Morice MC, Serruys PW, Barragan P, Bode C, Van Es GA, Stoll HP, et al. Long-term clinical outcomes with sirolimus-eluting coronary stents: Five-year results of the ravel trial. *J Am Coll Cardiol* 2007;50:1299-304.
293. Morrow DA, Scirica BM, Karwatowska-Prokopczuk E, Murphy SA, Budaj A, Varshavsky S, et al. Effects of ranolazine on recurrent cardiovascular events in patients with non-st-elevation acute coronary syndromes: The merlin-timi 36 randomized trial.[see comment]. *JAMA* 2007;297:1775-83.
294. Motallebzadeh R, Bland JM, Markus HS, Kaski JC, Jahangiri M. Neurocognitive function and cerebral emboli: Randomized study of on-pump versus off-pump coronary artery bypass surgery. *Ann Thorac Surg* 2007;83:475-82.
295. Motzer RJ, Hutson TE, Tomczak P, Michaelson MD, Bukowski RM, Rixe O, et al. Sunitinib versus interferon alfa in metastatic renal-cell carcinoma.[see comment]. *N Engl J Med* 2007;356:115-24.
296. Mourot L, Cluzeau C, Regnard J. Hyperbaric gaseous cryotherapy: Effects on skin temperature and systemic vasoconstriction. *Arch Phys Med Rehabil* 2007;88:1339-43.
297. Mukamal KJ, MacDermott K, Vinson JA, Oyama N, Manning WJ, Mittleman MA. A 6-month randomized pilot study of black tea and

- cardiovascular risk factors. *Am Heart J* 2007;154:724.e1-6.
298. Murphy GS, Szokol JW, Marymont JH, Avram MJ, Vender JS. The effects of morphine and fentanyl on the inflammatory response to cardiopulmonary bypass in patients undergoing elective coronary artery bypass graft surgery. *Anesth Analg*;104:1334-42.
299. Murray-Kolb LE, Beard JL. Iron treatment normalizes cognitive functioning in young women. *Am J Clin Nutr* 2007;85:778-87.
300. Mutty CE, Jensen EJ, Manka MA, Jr., Anders MJ, Bone LB. Femoral nerve block for diaphyseal and distal femoral fractures in the emergency department.[see comment]. *Journal of Bone & Joint Surgery - American Volume* 2007;89:2599-603.
301. Myers J, Hadley D, Oswald U, Bruner K, Kottman W, Hsu L, et al. Effects of exercise training on heart rate recovery in patients with chronic heart failure. *Am Heart J* 2007;153:1056-63.
302. Nadel S, Goldstein B, Williams MD, Dalton H, Peters M, Macias WL, et al. Drotrecogin alfa (activated) in children with severe sepsis: A multicentre phase iii randomised controlled trial.[see comment]. *Lancet* 2007;369:836-43.
303. Naja MZ, El-Rajab M, Kabalan W, Itani MT, Kharma K, Al Tannir MA, et al. Effectiveness of local anaesthesia (clonidine and fentanyl) infiltration for post-submucosal resection pain relief: A randomized, double-blinded clinical trial. *J Laryngol Otol* 2007;121:19-24.
304. Naucler P, Ryd W, Tornberg S, Strand A, Wadell G, Elfgren K, et al. Human papillomavirus and papanicolaou tests to screen for cervical cancer.[see comment][erratum appears in n engl j med. 2008 oct 9;359(15):1637 note: Johansson, bo [added]]. *N Engl J Med* 2007;357:1589-97.
305. Neuberger GB, Aaronson LS, Gajewski B, Embretson SE, Cagle PE, Loudon JK, et al. Predictors of exercise and effects of exercise on symptoms, function, aerobic fitness, and disease outcomes of rheumatoid arthritis. *Arthritis Rheum* 2007;57:943-52.
306. Newburger JW, Sleeper LA, McCrindle BW, Minich LL, Gersony W, Vetter VL, et al. Randomized trial of pulsed corticosteroid therapy for primary treatment of kawasaki disease.[see comment]. *N Engl J Med* 2007;356:663-75.
307. Nguyen TH, Tran TH, Thwaites G, Ly VC, Dinh XS, Ho Dang TN, et al. Dexamethasone in vietnamese adolescents and adults with bacterial meningitis.[see comment]. *N Engl J Med* 2007;357:2431-40.
308. Nissen SE, Nicholls SJ, Wolski K, Howey DC, McErlean E, Wang MD, et al. Effects of a potent and selective ppar-alpha agonist in patients with atherogenic dyslipidemia or hypercholesterolemia: Two randomized controlled trials. *JAMA* 2007;297:1362-73.
309. Nissen SE, Tardif JC, Nicholls SJ, Revkin JH, Shear CL, Duggan WT, et al. Effect of torcetrapib on the progression of coronary atherosclerosis.[see comment]. *N Engl J Med* 2007;356:1304-16.
310. Ntab B, Cisse B, Boulanger D, Sokhna C, Targett G, Lines J, et al. Impact of intermittent preventive anti-malarial treatment on the growth and nutritional status of preschool children in rural senegal (west africa). *Am J Trop Med Hyg* 2007;77:411-7.
311. Olshansky B, Day JD, Moore S, Gering L, Rosenbaum M, McGuire M, et al. Is dual-chamber programming inferior to single-chamber programming in an implantable cardioverter-defibrillator? Results of the intrinsic rv (inhibition of unnecessary rv pacing with avsh in icds) study. *Circulation* 2007;115:9-16.
312. O'Neill B, McKeivitt A, Rafferty S, Bradley JM, Johnston D, Bradbury I, et al. A comparison of twice- versus once-weekly supervision during pulmonary rehabilitation in chronic obstructive pulmonary disease. *Arch Phys Med Rehabil* 2007;88:167-72.
313. Oparil S, Yarows SA, Patel S, Fang H, Zhang J, Satlin A. Efficacy and safety of combined use of aliskiren and valsartan in patients with hypertension: A randomised, double-blind trial.[see comment]. *Lancet* 2007;370:221-9.
314. Paavonen J, Jenkins D, Bosch FX, Naud P, Salmeron J, Wheeler CM, et al. Efficacy of a prophylactic adjuvanted bivalent I1 virus-like-

particle vaccine against infection with human papillomavirus types 16 and 18 in young women: An interim analysis of a phase iii double-blind, randomised controlled trial.[see comment][erratum appears in lancet. 2007 oct 20;370(9596):1414]. *Lancet* 2007;369:2161-70.

315. Padian NS, van der Straten A, Ramjee G, Chipato T, de Bruyn G, Blanchard K, et al. Diaphragm and lubricant gel for prevention of hiv acquisition in southern african women: A randomised controlled trial.[see comment]. *Lancet* 2007;370:251-61.
316. Pajno GB, Caminiti L, Vita D, Barberio G, Salzano G, Lombardo F, et al. Sublingual immunotherapy in mite-sensitized children with atopic dermatitis: A randomized, double-blind, placebo-controlled study. *J Allergy Clin Immunol* 2007;120:164-70.
317. Pan M, Suarez de Lezo J, Medina A, Romero M, Delgado A, Segura J, et al. Drug-eluting stents for the treatment of bifurcation lesions: A randomized comparison between paclitaxel and sirolimus stents. *Am Heart J* 2007;153:15.e1-7.
318. Pandey P, Sehgal AR, Riboud M, Levine D, Goyal M. Informing resource-poor populations and the delivery of entitled health and social services in rural india: A cluster randomized controlled trial. *JAMA* 2007;298:1867-75.
319. Pandharipande PP, Pun BT, Herr DL, Maze M, Girard TD, Miller RR, et al. Effect of sedation with dexmedetomidine vs lorazepam on acute brain dysfunction in mechanically ventilated patients: The mends randomized controlled trial. *JAMA* 2007;298:2644-53.
320. Papi A, Canonica GW, Maestrelli P, Paggiaro P, Olivieri D, Pozzi E, et al. Rescue use of beclomethasone and albuterol in a single inhaler for mild asthma.[see comment]. *N Engl J Med* 2007;356:2040-52.
321. Paradise JL, Feldman HM, Campbell TF, Dollaghan CA, Rockette HE, Pitcairn DL, et al. Tympanostomy tubes and developmental outcomes at 9 to 11 years of age.[see comment]. *N Engl J Med* 2007;356:248-61.
322. Park MI, Camilleri M, O'Connor H, Oenning L, Burton D, Stephens D, et al. Effect of different macronutrients in excess on gastric sensory and motor functions and appetite in normal-weight, overweight, and obese humans. *Am J Clin Nutr* 2007;85:411-8.
323. Patte C, Auperin A, Gerrard M, Michon J, Pinkerton R, Sposto R, et al. Results of the randomized international fab/lmb96 trial for intermediate risk b-cell non-hodgkin lymphoma in children and adolescents: It is possible to reduce treatment for the early responding patients. *Blood* 2007;109:2773-80.
324. Patti G, Pasceri V, Colonna G, Miglionico M, Fischetti D, Sardella G, et al. Atorvastatin pretreatment improves outcomes in patients with acute coronary syndromes undergoing early percutaneous coronary intervention: Results of the armyda-acs randomized trial. *J Am Coll Cardiol* 2007;49:1272-8.
325. Pedersen SD, Kang J, Kline GA. Portion control plate for weight loss in obese patients with type 2 diabetes mellitus: A controlled clinical trial. *Arch Intern Med* 2007;167:1277-83.
326. Pengel LH, Refshauge KM, Maher CG, Nicholas MK, Herbert RD, McNair P. Physiotherapist-directed exercise, advice, or both for subacute low back pain: A randomized trial.[summary for patients in ann intern med. 2007 jun 5;146(11):I56; pmid: 17548406]. *Ann Intern Med* 2007;146:787-96.
327. Peters SP, Anthonisen N, Castro M, Holbrook JT, Irvin CG, Smith LJ, et al. Randomized comparison of strategies for reducing treatment in mild persistent asthma.[see comment]. *N Engl J Med* 2007;356:2027-39.
328. Petrie KJ, Muller JT, Schirmbeck F, Donkin L, Broadbent E, Ellis CJ, et al. Effect of providing information about normal test results on patients' reassurance: Randomised controlled trial.[see comment]. *BMJ* 2007;334:352.
329. Petronio AS, De Carlo M, Branchitta G, Papini B, Ciabatti N, Gistri R, et al. Randomized comparison of sirolimus and paclitaxel drug-eluting stents for long lesions in the left anterior descending artery: An intravascular ultrasound study. *J Am Coll Cardiol*

2007;49:539-46.

330. Peul WC, van Houwelingen HC, van den Hout WB, Brand R, Eekhof JA, Tans JT, et al. Surgery versus prolonged conservative treatment for sciatica.[see comment]. *N Engl J Med* 2007;356:2245-56.
331. Picard E, Goldberg S, Virgilis D, Schwartz S, Raveh D, Kerem E. A single dose of dexamethasone to prevent postbronchoscopy fever in children: A randomized placebo-controlled trial. *Chest* 2007;131:201-5.
332. Pierce JP, Natarajan L, Caan BJ, Parker BA, Greenberg ER, Flatt SW, et al. Influence of a diet very high in vegetables, fruit, and fiber and low in fat on prognosis following treatment for breast cancer: The women's healthy eating and living (whel) randomized trial.[see comment]. *JAMA* 2007;298:289-98.
333. Pieters R, Schrappe M, De Lorenzo P, Hann I, De Rossi G, Felice M, et al. A treatment protocol for infants younger than 1 year with acute lymphoblastic leukaemia (interfant-99): An observational study and a multicentre randomised trial.[see comment]. *Lancet* 2007;370:240-50.
334. Poggio RA, Turgeon TR, Coutts RD. Failure analysis of a ceramic bearing acetabular component. *Journal of Bone & Joint Surgery - American Volume* 2007;89:367-75.
335. Poldermans D, Schouten O, Vidakovic R, Bax JJ, Thomson IR, Hoeks SE, et al. A clinical randomized trial to evaluate the safety of a noninvasive approach in high-risk patients undergoing major vascular surgery: The decrease-v pilot study.[see comment]. *J Am Coll Cardiol* 2007;49:1763-9.
336. Pomerantz M, Manola J, Taplin M-E, Bubley G, Inman M, Lowell J, et al. Phase ii study of low dose and high dose conjugated estrogen for androgen independent prostate cancer. *J Urol* 2007;177:2146-50.
337. Pope E, Krafchik BR, Macarthur C, Stempak D, Stephens D, Weinstein M, et al. Oral versus high-dose pulse corticosteroids for problematic infantile hemangiomas: A randomized, controlled trial. *Pediatrics* 2007;119:e1239-47.
338. Posner MR, Hershock DM, Blajman CR, Mickiewicz E, Winquist E, Gorbounova V, et al. Cisplatin and fluorouracil alone or with docetaxel in head and neck cancer. *N Engl J Med* 2007;357:1705-15.
339. Quasar Collaborative G, Gray R, Barnwell J, McConkey C, Hills RK, Williams NS, et al. Adjuvant chemotherapy versus observation in patients with colorectal cancer: A randomised study.[see comment]. *Lancet* 2007;370:2020-9.
340. Rafter J, Bennett M, Caderni G, Clune Y, Hughes R, Karlsson PC, et al. Dietary synbiotics reduce cancer risk factors in polypectomized and colon cancer patients. *Am J Clin Nutr* 2007;85:488-96.
341. Rakowski T, Zalewski J, Legutko J, Bartus S, Rzeszutko L, Dziewierz A, et al. Early abciximab administration before primary percutaneous coronary intervention improves infarct-related artery patency and left ventricular function in high-risk patients with anterior wall myocardial infarction: A randomized study. *Am Heart J* 2007;153:360-5.
342. Ranson MK, Sinha T, Chatterjee M, Gandhi F, Jayswal R, Patel F, et al. Equitable utilisation of indian community based health insurance scheme among its rural membership: Cluster randomised controlled trial.[see comment]. *BMJ* 2007;334:1309.
343. Ratcliff A, Siswanto H, Kenangalem E, Maristela R, Wuwung RM, Laihad F, et al. Two fixed-dose artemisinin combinations for drug-resistant falciparum and vivax malaria in papua, indonesia: An open-label randomised comparison. *Lancet* 2007;369:757-65.
344. Raveendran NS, Tharyan P, Alexander J, Adams CE, Group TR-IIC. Rapid tranquillisation in psychiatric emergency settings in india: Pragmatic randomised controlled trial of intramuscular olanzapine versus intramuscular haloperidol plus promethazine.[see comment]. *BMJ* 2007;335:865.

345. Recio-Mayoral A, Chaparro M, Prado B, Cozar R, Mendez I, Banerjee D, et al. The reno-protective effect of hydration with sodium bicarbonate plus n-acetylcysteine in patients undergoing emergency percutaneous coronary intervention: The reno study. *J Am Coll Cardiol* 2007;49:1283-8.
346. Reddy VY, Reynolds MR, Neuzil P, Richardson AW, Taborsky M, Jongnarangsin K, et al. Prophylactic catheter ablation for the prevention of defibrillator therapy.[see comment]. *N Engl J Med* 2007;357:2657-65.
347. Redman LM, Heilbronn LK, Martin CK, Alfonso A, Smith SR, Ravussin E, et al. Effect of calorie restriction with or without exercise on body composition and fat distribution. *J Clin Endocrinol Metab* 2007;92:865-72.
348. Reed MF, Lyons JM, Luchette FA, Neu JA, Howington JA. Preliminary report of a prospective, randomized trial of underwater seal for spontaneous and iatrogenic pneumothorax. *J Am Coll Surg* 2007;204:84-90.
349. Reid IR, Cundy T, Grey AB, Horne A, Clearwater J, Ames R, et al. Addition of monofluorophosphate to estrogen therapy in postmenopausal osteoporosis: A randomized controlled trial. *J Clin Endocrinol Metab* 2007;92:2446-52.
350. REST Investigators, Edwards RD, Moss JG, Lumsden MA, Wu O, Murray LS, et al. Uterine-artery embolization versus surgery for symptomatic uterine fibroids.[see comment]. *N Engl J Med* 2007;356:360-70.
351. Reyburn H, Mbakilwa H, Mwangi R, Mwerinde O, Olomi R, Drakeley C, et al. Rapid diagnostic tests compared with malaria microscopy for guiding outpatient treatment of febrile illness in tanzania: Randomised trial.[see comment]. *BMJ* 2007;334:403.
352. Robinson RD, Casablanca Y, Pagano KE, Arthur NA, Bates GW, Propst AM. Intracervical block and pain perception during the performance of a hysterosalpingogram: A randomized controlled trial. *Obstet Gynecol* 2007;109:89-93.
353. Roche G, Ponthieux A, Parot-Shinkel E, Jousset N, Bontoux L, Dubus V, et al. Comparison of a functional restoration program with active individual physical therapy for patients with chronic low back pain: A randomized controlled trial. *Arch Phys Med Rehabil* 2007;88:1229-35.
354. Roelofs PD, Bierma-Zeinstra SM, van Poppel MN, Jellema P, Willemsen SP, van Tulder MW, et al. Lumbar supports to prevent recurrent low back pain among home care workers: A randomized trial.[summary for patients in ann intern med. 2007 nov 20;147(10):I54; pmid: 18025442]. *Ann Intern Med* 2007;147:685-92.
355. Ronco G, Cuzick J, Pierotti P, Cariaggi MP, Dalla Palma P, Naldoni C, et al. Accuracy of liquid based versus conventional cytology: Overall results of new technologies for cervical cancer screening: Randomised controlled trial.[see comment]. *BMJ* 2007;335:28.
356. Rosenfeld PJ, Boyer DS, Bressler NM, Fish G, Grizzard WS, Hao Y, et al. Verteporfin therapy of subfoveal occult choroidal neovascularization in amd using delayed light application: One-year results of the valio study. *Am J Ophthalmol* 2007;144:970-72.
357. Ross MA, Compton S, Medado P, Fitzgerald M, Kilanowski P, O'Neil BJ. An emergency department diagnostic protocol for patients with transient ischemic attack: A randomized controlled trial. *Ann Emerg Med* 2007;50:109-19.
358. Rouse DJ, Caritis SN, Peaceman AM, Sciscione A, Thom EA, Spong CY, et al. A trial of 17 alpha-hydroxyprogesterone caproate to prevent prematurity in twins.[see comment]. *N Engl J Med* 2007;357:454-61.
359. Rudolph TK, Ruempler K, Schwedhelm E, Tan-Andresen J, Riederer U, Boger RH, et al. Acute effects of various fast-food meals on vascular function and cardiovascular disease risk markers: The hamburg burger trial. *Am J Clin Nutr* 2007;86:334-40.
360. Ruiz-Palacios GM, Guerrero ML, Bautista-Marquez A, Ortega-Gallegos H, Tuz-Dzib F, Reyes-Gonzalez L, et al. Dose response and efficacy of a live, attenuated human rotavirus vaccine in mexican infants. *Pediatrics* 2007;120:e253-61.
361. Rynn MA, Riddle MA, Yeung PP, Kunz NR. Efficacy and safety of extended-release venlafaxine in the treatment of generalized

- anxiety disorder in children and adolescents: Two placebo-controlled trials. *Am J Psychiatry* 2007;164:290-300.
362. Sachs GS, Nierenberg AA, Calabrese JR, Marangell LB, Wisniewski SR, Gyulai L, et al. Effectiveness of adjunctive antidepressant treatment for bipolar depression.[see comment]. *N Engl J Med* 2007;356:1711-22.
363. Sahai A, Khan MS, Dasgupta P. Efficacy of botulinum toxin-a for treating idiopathic detrusor overactivity: Results from a single center, randomized, double-blind, placebo controlled trial. *J Urol* 2007;177:2231-6.
364. Sakuramoto S, Sasako M, Yamaguchi T, Kinoshita T, Fujii M, Nashimoto A, et al. Adjuvant chemotherapy for gastric cancer with s-1, an oral fluoropyrimidine.[see comment]. *N Engl J Med* 2007;357:1810-20.
365. Salminen PTP, Hiekkänen HI, Rantala APT, Ovaska JT. Comparison of long-term outcome of laparoscopic and conventional nissen fundoplication: A prospective randomized study with an 11-year follow-up. *Ann Surg* 2007;246:201-6.
366. Sandborn WJ, Feagan BG, Stoinov S, Honiball PJ, Rutgeerts P, Mason D, et al. Certolizumab pegol for the treatment of crohn's disease.[see comment]. *N Engl J Med* 2007;357:228-38.
367. Sandborn WJ, Hanauer SB, Rutgeerts P, Fedorak RN, Lukas M, MacIntosh DG, et al. Adalimumab for maintenance treatment of crohn's disease: Results of the classic ii trial.[see comment]. *Gut* 2007;56:1232-9.
368. Sandborn WJ, Rutgeerts P, Enns R, Hanauer SB, Colombel J-F, Panaccione R, et al. Adalimumab induction therapy for crohn disease previously treated with infliximab: A randomized trial.[see comment][summary for patients in ann intern med. 2007 jun 19;146(12):I20; pmid: 17470825]. *Ann Intern Med* 2007;146:829-38.
369. Sattar N, Crompton P, Cherry L, Kane D, Lowe G, McInnes IB. Effects of tumor necrosis factor blockade on cardiovascular risk factors in psoriatic arthritis: A double-blind, placebo-controlled study. *Arthritis Rheum* 2007;56:831-9.
370. Sawka AM, Ray JG, Yi Q, Josse RG, Lonn E. Randomized clinical trial of homocysteine level lowering therapy and fractures. *Arch Intern Med* 2007;167:2136-9.
371. Sazawal S, Black RE, Ramsan M, Chwaya HM, Dutta A, Dhingra U, et al. Effect of zinc supplementation on mortality in children aged 1-48 months: A community-based randomised placebo-controlled trial.[see comment]. *Lancet* 2007;369:927-34.
372. Sazawal S, Dhingra U, Dhingra P, Hiremath G, Kumar J, Sarkar A, et al. Effects of fortified milk on morbidity in young children in north india: Community based, randomised, double masked placebo controlled trial.[see comment]. *BMJ* 2007;334:140.
373. Scarborough M, Gordon SB, Whitty CJ, French N, Njalale Y, Chitani A, et al. Corticosteroids for bacterial meningitis in adults in sub-saharan africa.[see comment]. *N Engl J Med* 2007;357:2441-50.
374. Schmidt B, Roberts RS, Davis P, Doyle LW, Barrington KJ, Ohlsson A, et al. Long-term effects of caffeine therapy for apnea of prematurity.[see comment]. *N Engl J Med* 2007;357:1893-902.
375. Schreiber S, Khaliq-Kareemi M, Lawrance IC, Thomsen OO, Hanauer SB, McColm J, et al. Maintenance therapy with certolizumab pegol for crohn's disease.[see comment]. *N Engl J Med* 2007;357:239-50.
376. Scirica BM, Morrow DA, Hod H, Murphy SA, Belardinelli L, Hedgepeth CM, et al. Effect of ranolazine, an antianginal agent with novel electrophysiological properties, on the incidence of arrhythmias in patients with non st-segment elevation acute coronary syndrome: Results from the metabolic efficiency with ranolazine for less ischemia in non st-elevation acute coronary syndrome thrombolysis in myocardial infarction 36 (merlin-timi 36) randomized controlled trial. *Circulation* 2007;116:1647-52.
377. Sconce E, Avery P, Wynne H, Kamali F. Vitamin k supplementation can improve stability of anticoagulation for patients with unexplained variability in response to warfarin. *Blood* 2007;109:2419-23.

378. Serisier DJ, Coates AD, Bowler SD. Effect of albuterol on maximal exercise capacity in cystic fibrosis. *Chest* 2007;131:1181-7.
379. Seymour MT, Maughan TS, Ledermann JA, Topham C, James R, Gwyther SJ, et al. Different strategies of sequential and combination chemotherapy for patients with poor prognosis advanced colorectal cancer (mrc focus): A randomised controlled trial.[see comment][erratum appears in lancet. 2007 aug 18;370(9587):566]. *Lancet* 2007;370:143-52.
380. Sezer M, Oflaz H, Goren T, Okcular I, Umman B, Nianci Y, et al. Intracoronary streptokinase after primary percutaneous coronary intervention.[see comment]. *N Engl J Med* 2007;356:1823-34.
381. Shaddy RE, Boucek MM, Hsu DT, Boucek RJ, Canter CE, Mahony L, et al. Carvedilol for children and adolescents with heart failure: A randomized controlled trial.[see comment]. *JAMA* 2007;298:1171-9.
382. Shalaby AA, Atwood CW, Hansen C, Konermann M, Freedman R, Fowler J, et al. Analysis of interaction of acute atrial overdrive pacing with sleep-related breathing disorder. *Am J Cardiol* 2007;99:573-8.
383. Sherman DG, Albers GW, Bladin C, Fieschi C, Gabbai AA, Kase CS, et al. The efficacy and safety of enoxaparin versus unfractionated heparin for the prevention of venous thromboembolism after acute ischaemic stroke (prevail study): An open-label randomised comparison.[see comment]. *Lancet* 2007;369:1347-55.
384. Shiffman ML, Suter F, Bacon BR, Nelson D, Harley H, Sola R, et al. Peginterferon alfa-2a and ribavirin for 16 or 24 weeks in hcv genotype 2 or 3.[see comment]. *N Engl J Med* 2007;357:124-34.
385. Shim J-C, Shin J-GK, Kelly DL, Jung D-U, Seo Y-S, Liu K-H, et al. Adjunctive treatment with a dopamine partial agonist, aripiprazole, for antipsychotic-induced hyperprolactinemia: A placebo-controlled trial.[see comment]. *Am J Psychiatry* 2007;164:1404-10.
386. Sijbrandij M, Olf M, Reitsma JB, Carlier IV, de Vries MH, Gersons BP. Treatment of acute posttraumatic stress disorder with brief cognitive behavioral therapy: A randomized controlled trial.[see comment]. *Am J Psychiatry* 2007;164:82-90.
387. Simon D, Prieur A-M, Quartier P, Charles Ruiz J, Czernichow P. Early recombinant human growth hormone treatment in glucocorticoid-treated children with juvenile idiopathic arthritis: A 3-year randomized study. *J Clin Endocrinol Metab* 2007;92:2567-73.
388. Sin DD, Wong E, Mayers I, Lien DC, Feeny D, Cheung H, et al. Effects of nocturnal noninvasive mechanical ventilation on heart rate variability of patients with advanced copd. *Chest* 2007;131:156-63.
389. Singh BN, Connolly SJ, Crijns HJ, Roy D, Kowey PR, Capucci A, et al. Dronedronone for maintenance of sinus rhythm in atrial fibrillation or flutter.[see comment]. *N Engl J Med* 2007;357:987-99.
390. Singler B, Troster A, Manering N, Schuttler J, Koppert W. Modulation of remifentanyl-induced postinfusion hyperalgesia by propofol. *Anesth Analg*;104:1397-403.
391. Slotman B, Faivre-Finn C, Kramer G, Rankin E, Snee M, Hatton M, et al. Prophylactic cranial irradiation in extensive small-cell lung cancer. *N Engl J Med* 2007;357:664-72.
392. Smith I, Procter M, Gelber RD, Guillaume S, Feyereislova A, Dowsett M, et al. 2-year follow-up of trastuzumab after adjuvant chemotherapy in her2-positive breast cancer: A randomised controlled trial.[see comment]. *Lancet* 2007;369:29-36.
393. Soliman SA, Wadie BS, Ibrahim el HE, Shehab El-Dein AB. Rotoresection versus transurethral resection of the prostate: Short-term evaluation of a prospective randomized study.[see comment]. *J Urol* 2007;177:1036-9.
394. Spiegel D, Butler LD, Giese-Davis J, Koopman C, Miller E, DiMiceli S, et al. Effects of supportive-expressive group therapy on survival of patients with metastatic breast cancer: A randomized prospective trial. *Cancer* 2007;110:1130-8.



395. Staskin D, Sand P, Zinner N, Dmochowski R, Trosipium Study G. Once daily tropsium chloride is effective and well tolerated for the treatment of overactive bladder: Results from a multicenter phase iii trial. *J Urol* 2007;178:978-83; discussion 83-4.
396. Stavroulaki P, Skoulakis C, Theos E, Kokalis N, Valagianis D. Thermal welding versus cold dissection tonsillectomy: A prospective, randomized, single-blind study in adult patients. *Ann Otol Rhinol Laryngol* 2007;116:565-70.
397. Stensballe J, Tvede M, Looms D, Lippert FK, Dahl B, Tonnesen E, et al. Infection risk with nitrofurazone-impregnated urinary catheters in trauma patients: A randomized trial. *Ann Intern Med* 2007;147:285-93.
398. Stewart CE, Stephens DA, Fielder AR, Moseley MJ, Cooperative R. Objectively monitored patching regimens for treatment of amblyopia: Randomised trial.[see comment]. *BMJ* 2007;335:707.
399. Stone GW, Bertrand ME, Moses JW, Ohman EM, Lincoff AM, Ware JH, et al. Routine upstream initiation vs deferred selective use of glycoprotein iib/iiia inhibitors in acute coronary syndromes: The acuity timing trial.[see comment]. *JAMA* 2007;297:591-602.
400. Stone GW, Ware JH, Bertrand ME, Lincoff AM, Moses JW, Ohman EM, et al. Antithrombotic strategies in patients with acute coronary syndromes undergoing early invasive management: One-year results from the acuity trial. *JAMA* 2007;298:2497-506.
401. Storch A, Jost WH, Vieregge P, Spiegel J, Greulich W, Durner J, et al. Randomized, double-blind, placebo-controlled trial on symptomatic effects of coenzyme q(10) in parkinson disease. *Arch Neurol* 2007;64:938-44.
402. Strander B, Andersson-Ellstrom A, Milsom I, Radberg T, Ryd W. Liquid-based cytology versus conventional papanicolaou smear in an organized screening program : A prospective randomized study. *Cancer* 2007;111:285-91.
403. Stremmel W, Ehehalt R, Autschbach F, Karner M. Phosphatidylcholine for steroid-refractory chronic ulcerative colitis: A randomized trial. *Ann Intern Med* 2007;147:603-10.
404. Su L-L, Chong Y-S, Chan Y-H, Chan Y-S, Fok D, Tun K-T, et al. Antenatal education and postnatal support strategies for improving rates of exclusive breast feeding: Randomised controlled trial.[see comment]. *BMJ* 2007;335:596.
405. Sullivan FM, Swan IR, Donnan PT, Morrison JM, Smith BH, McKinstry B, et al. Early treatment with prednisolone or acyclovir in bell's palsy.[see comment]. *N Engl J Med* 2007;357:1598-607.
406. Sultana S, Awai K, Nakayama Y, Nakaura T, Liu D, Hatemura M, et al. Hypervascular hepatocellular carcinomas: Bolus tracking with a 40-detector ct scanner to time arterial phase imaging. *Radiology* 2007;243:140-7.
407. Sweeney MO, Bank AJ, Nsah E, Koullick M, Zeng QC, Hettrick D, et al. Minimizing ventricular pacing to reduce atrial fibrillation in sinus-node disease. *N Engl J Med* 2007;357:1000-8.
408. Tan PC, Yow CM, Omar SZ. Effect of coital activity on onset of labor in women scheduled for labor induction: A randomized controlled trial. *Obstet Gynecol* 2007;110:820-6.
409. Tardif JC, Gregoire J, L'Allier PL, Ibrahim R, Lesperance J, Heinonen TM, et al. Effects of reconstituted high-density lipoprotein infusions on coronary atherosclerosis: A randomized controlled trial. *JAMA* 2007;297:1675-82.
410. Teoh WH, Lim Y. Comparison of the single use and reusable intubating laryngeal mask airway. *Anaesthesia* 2007;62:381-4.
411. Teppema LJ, Balanos GM, Steinback CD, Brown AD, Foster GE, Duff HJ, et al. Effects of acetazolamide on ventilatory, cerebrovascular, and pulmonary vascular responses to hypoxia. *Am J Respir Crit Care Med* 2007;175:277-81.
412. Thapa S, Hollander J, Linehan M, Cox-Singh J, Bista MB, Thakur GD, et al. Comparison of artemether-lumefantrine with sulfadoxine-pyrimethamine for the treatment of uncomplicated falciparum malaria in eastern nepal. *Am J Trop Med Hyg* 2007;77:423-30.
413. Thiam S, LeFevre AM, Hane F, Ndiaye A, Ba F, Fielding KL, et al. Effectiveness of a strategy to improve adherence to tuberculosis

- treatment in a resource-poor setting: A cluster randomized controlled trial. *JAMA* 2007;297:380-6.
414. Thomson MA, Jenkins HR, Bisset WM, Heuschkel R, Kalra DS, Green MR, et al. Polyethylene glycol 3350 plus electrolytes for chronic constipation in children: A double blind, placebo controlled, crossover study. *Arch Dis Child* 2007;92:996-1000.
415. Tielsch JM, Khatry SK, Stoltzfus RJ, Katz J, LeClerq SC, Adhikari R, et al. Effect of daily zinc supplementation on child mortality in southern nepal: A community-based, cluster randomised, placebo-controlled trial.[see comment]. *Lancet* 2007;370:1230-9.
416. Torgerson CS, Brydges R, Chen JM, Dubrowski A. Drilling simulated temporal bones with left-handed tools: A left-hander's right? *Ann Otol Rhinol Laryngol* 2007;116:819-26.
417. Tornqvist H, Mills NL, Gonzalez M, Miller MR, Robinson SD, Megson IL, et al. Persistent endothelial dysfunction in humans after diesel exhaust inhalation.[see comment]. *Am J Respir Crit Care Med* 2007;176:395-400.
418. Treanor JJ, Schiff GM, Hayden FG, Brady RC, Hay CM, Meyer AL, et al. Safety and immunogenicity of a baculovirus-expressed hemagglutinin influenza vaccine: A randomized controlled trial. *JAMA* 2007;297:1577-82.
419. Triumph Investigators, Alexander JH, Reynolds HR, Stebbins AL, Harrington RA, Van de Werf F, et al. Effect of tilarginine acetate in patients with acute myocardial infarction and cardiogenic shock: The triumph randomized controlled trial.[see comment]. *JAMA* 2007;297:1657-66.
420. Tunon-de-Lara JM, Laurent F, Giraud V, Perez T, Aguilaniu B, Meziane H, et al. Air trapping in mild and moderate asthma: Effect of inhaled corticosteroids. *J Allergy Clin Immunol* 2007;119:583-90.
421. Ullmann AJ, Lipton JH, Vesole DH, Chandrasekar P, Langston A, Tarantolo SR, et al. Posaconazole or fluconazole for prophylaxis in severe graft-versus-host disease.[see comment]. *N Engl J Med* 2007;356:335-47.
422. Uvehammer J, Karrholm J, Carlsson L. Cemented versus hydroxyapatite fixation of the femoral component of the freeman-samuelson total knee replacement: A radiostereometric analysis. *Journal of Bone & Joint Surgery - British Volume* 2007;89:39-44.
423. Valencia R, Price MJ, Sawhney N, Lee SS, Wong GB, Gollapudi RR, et al. Efficacy and safety of triple antiplatelet therapy with and without concomitant anticoagulation during elective percutaneous coronary intervention (the remove trial). *Am J Cardiol* 2007;100:1099-102.
424. van Dijk D, Spoor M, Hijman R, Nathoe HM, Borst C, Jansen EW, et al. Cognitive and cardiac outcomes 5 years after off-pump vs on-pump coronary artery bypass graft surgery. *JAMA* 2007;297:701-8.
425. van Gogh I, Buller HR, Cohen AT, Davidson B, Decousus H, Gallus AS, et al. Extended prophylaxis of venous thromboembolism with idraparinix. *N Engl J Med* 2007;357:1105-12.
426. Van Hoeck KJ, Bael A, Van Dessel E, Van Renthergem D, Bernaerts K, Vandermaelen V, et al. Do holding exercises or antimuscarinics increase maximum voided volume in monosymptomatic nocturnal enuresis? A randomized controlled trial in children. *J Urol* 2007;178:2132-6.
427. van Ruler O, Mahler CW, Boer KR, Reuland EA, Gooszen HG, Opmeer BC, et al. Comparison of on-demand vs planned relaparotomy strategy in patients with severe peritonitis: A randomized trial.[see comment]. *JAMA* 2007;298:865-72.
428. van Veen RN, Wijsmuller AR, Vrijland WW, Hop WC, Lange JF, Jeekel J. Long-term follow-up of a randomized clinical trial of non-mesh versus mesh repair of primary inguinal hernia. *Br J Surg* 2007;94:506-10.
429. Verdonck LF, Notenboom A, de Jong DD, MacKenzie MA, Verhoef GE, Kramer MH, et al. Intensified 12-week chop (i-chop) plus g-csf compared with standard 24-week chop (chop-21) for patients with intermediate-risk aggressive non-hodgkin lymphoma: A phase

- 3 trial of the dutch-belgian hemato-oncology cooperative group (hovan). *Blood* 2007;109:2759-66.
430. Vetter TR, Carvallo D, Johnson JL, Mazurek MS, Presson RG, Jr. A comparison of single-dose caudal clonidine, morphine, or hydromorphone combined with ropivacaine in pediatric patients undergoing ureteral reimplantation. *Anesth Analg* 2007;104:1356-63.
431. Vickers MR, MacLennan AH, Lawton B, Ford D, Martin J, Meredith SK, et al. Main morbidities recorded in the women's international study of long duration oestrogen after menopause (wisdom): A randomised controlled trial of hormone replacement therapy in postmenopausal women.[see comment]. *BMJ* 2007;335:239.
432. Victor JC, Monto AS, Surdina TY, Suleimenova SZ, Vaughan G, Nainan OV, et al. Hepatitis a vaccine versus immune globulin for postexposure prophylaxis.[see comment]. *N Engl J Med* 2007;357:1685-94.
433. von Hertzen H, Piaggio G, Huong NT, Arustamyan K, Cabezas E, Gomez M, et al. Efficacy of two intervals and two routes of administration of misoprostol for termination of early pregnancy: A randomised controlled equivalence trial.[see comment]. *Lancet* 2007;369:1938-46.
434. Wallen M, O'Flaherty SJ, Waugh MC. Functional outcomes of intramuscular botulinum toxin type a and occupational therapy in the upper limbs of children with cerebral palsy: A randomized controlled trial. *Arch Phys Med Rehabil* 2007;88:1-10.
435. Wang PS, Simon GE, Avorn J, Azocar F, Ludman EJ, McCulloch J, et al. Telephone screening, outreach, and care management for depressed workers and impact on clinical and work productivity outcomes: A randomized controlled trial.[see comment]. *JAMA* 2007;298:1401-11.
436. Wapner RJ, Sorokin Y, Mele L, Johnson F, Dudley DJ, Spong CY, et al. Long-term outcomes after repeat doses of antenatal corticosteroids.[see comment]. *N Engl J Med* 2007;357:1190-8.
437. Wappler F, Rossaint R, Baumert J, Scholz J, Tonner PH, van Aken H, et al. Multicenter randomized comparison of xenon and isoflurane on left ventricular function in patients undergoing elective surgery. *Anesthesiology* 2007;106:463-71.
438. Wathen JE, Gao D, Merritt G, Georgopoulos G, Battan FK. A randomized controlled trial comparing a fascia iliaca compartment nerve block to a traditional systemic analgesic for femur fractures in a pediatric emergency department. *Ann Emerg Med*;50:162-71.
439. Watt S, Pickhardt D, Lerman J, Armstrong J, Creighton PR, Feldman L. Telescoping tracheal tubes into catheters minimizes epistaxis during nasotracheal intubation in children. *Anesthesiology* 2007;106:238-42.
440. WAVE Investigators, Anand S, Yusuf S, Xie C, Pogue J, Eikelboom J, et al. Oral anticoagulant and antiplatelet therapy and peripheral arterial disease.[see comment]. *N Engl J Med* 2007;357:217-27.
441. Westhoff C, Heartwell S, Edwards S, Ziemann M, Cushman L, Robilotto C, et al. Initiation of oral contraceptives using a quick start compared with a conventional start: A randomized controlled trial.[see comment]. *Obstet Gynecol* 2007;109:1270-6.
442. Whitelaw A, Evans D, Carter M, Thoresen M, Wroblewska J, Mandera M, et al. Randomized clinical trial of prevention of hydrocephalus after intraventricular hemorrhage in preterm infants: Brain-washing versus tapping fluid. *Pediatrics* 2007;119:e1071-8.
443. Wijaya-Erhardt M, Erhardt JG, Untoro J, Karyadi E, Wibowo L, Gross R. Effect of daily or weekly multiple-micronutrient and iron foodlike tablets on body iron stores of indonesian infants aged 6-12 mo: A double-blind, randomized, placebo-controlled trial. *Am J Clin Nutr* 2007;86:1680-6.
444. Wilfley DE, Stein RI, Saelens BE, Mockus DS, Matt GE, Hayden-Wade HA, et al. Efficacy of maintenance treatment approaches for childhood overweight: A randomized controlled trial.[see comment]. *JAMA* 2007;298:1661-73.
445. Williamson IG, Rumsby K, Bengte S, Moore M, Smith PW, Cross M, et al. Antibiotics and topical nasal steroid for treatment of acute

- maxillary sinusitis: A randomized controlled trial.[see comment]. *JAMA* 2007;298:2487-96.
446. Wilson AM, Harada R, Nair N, Balasubramanian N, Cooke JP. L-arginine supplementation in peripheral arterial disease: No benefit and possible harm. *Circulation* 2007;116:188-95.
447. Winblad B, Grossberg G, Frolich L, Farlow M, Zechner S, Nagel J, et al. Ideal: A 6-month, double-blind, placebo-controlled study of the first skin patch for alzheimer disease. *Neurology* 2007;69:S14-22.
448. Wiviott SD, Braunwald E, McCabe CH, Montalescot G, Ruzyllo W, Gottlieb S, et al. Prasugrel versus clopidogrel in patients with acute coronary syndromes.[see comment]. *N Engl J Med* 2007;357:2001-15.
449. Wiviott SD, Trenk D, Frelinger AL, O'Donoghue M, Neumann F-J, Michelson AD, et al. Prasugrel compared with high loading- and maintenance-dose clopidogrel in patients with planned percutaneous coronary intervention: The prasugrel in comparison to clopidogrel for inhibition of platelet activation and aggregation-thrombolysis in myocardial infarction 44 trial. *Circulation* 2007;116:2923-32.
450. Woloshin S, Schwartz LM, Welch HG. The effectiveness of a primer to help people understand risk: Two randomized trials in distinct populations. *Ann Intern Med* 2007;146:256-65.
451. Wright JG, Donaldson S, Howard A, Stephens D, Alman B, Hedden D. Are surgeons' preferences for instrumentation related to patient outcomes? A randomized clinical trial of two implants for idiopathic scoliosis. *Journal of Bone & Joint Surgery - American Volume* 2007;89:2684-93.
452. Xue FS, Liao X, Liu KP, Liu Y, Xu YC, Yang QY, et al. The circulatory responses to tracheal intubation in children: A comparison of the oral and nasal routes. *Anaesthesia* 2007;62:220-6.
453. Yones SS, Palmer RA, Garibaldinos TM, Hawk JL. Randomized double-blind trial of treatment of vitiligo: Efficacy of psoralen-uv-a therapy vs narrowband-uv-b therapy.[see comment][erratum appears in arch dermatol. 2007 jul;143(7):906]. *Arch Dermatol* 2007;143:578-84.
454. Yu ML, Dai CY, Huang JF, Hou NJ, Lee LP, Hsieh MY, et al. A randomised study of peginterferon and ribavirin for 16 versus 24 weeks in patients with genotype 2 chronic hepatitis c. *Gut* 2007;56:553-9.
455. Yuen VM, Irwin MG, Hui TW, Yuen MK, Lee LHY. A double-blind, crossover assessment of the sedative and analgesic effects of intranasal dexmedetomidine. *Anesth Analg* 2007;105:374-80.
456. Zar HJ, Cotton MF, Strauss S, Karpakis J, Hussey G, Schaaf HS, et al. Effect of isoniazid prophylaxis on mortality and incidence of tuberculosis in children with hiv: Randomised controlled trial.[see comment]. *BMJ* 2007;334:136.
457. Zhang J, Zhang W, Li B. The effect of epidural anesthesia with different concentrations of ropivacaine on sevoflurane requirements. *Anesth Analg* 2007;104:984-6.
458. Zheng J-P, Yang L, Wu YM, Chen P, Wen ZG, Huang W-J, et al. The efficacy and safety of combination salmeterol (50 microg)/fluticasone propionate (500 microg) inhalation twice daily via accuhaler in chinese patients with copd. *Chest* 2007;132:1756-63.
459. Zimmermann MB, Jooste PL, Mabapa NS, Schoeman S, Biebinger R, Mushaphi LF, et al. Vitamin a supplementation in iodine-deficient african children decreases thyrotropin stimulation of the thyroid and reduces the goiter rate. *Am J Clin Nutr* 2007;86:1040-4.

**Supplementary file 6. List of included studies and their funding status**

| Author                 | Journal name                    | Industry funded trial | Governmental funding | Private not-for-profit funding | Industry funding | Clearly reported, no funding | Not reported |
|------------------------|---------------------------------|-----------------------|----------------------|--------------------------------|------------------|------------------------------|--------------|
| Aaron                  | Ann Intern Med                  | FALSE                 | TRUE                 | TRUE                           | FALSE            | FALSE                        | FALSE        |
| Addolorato             | Lancet                          | FALSE                 | TRUE                 | FALSE                          | FALSE            | FALSE                        | FALSE        |
| Adu-Afarwuath          | Am J Clin Nutr                  | TRUE                  | TRUE                 | FALSE                          | TRUE             | FALSE                        | FALSE        |
| ADVANCE                | Lancet                          | TRUE                  | TRUE                 | FALSE                          | TRUE             | FALSE                        | FALSE        |
| Agnelli                | Circulation                     | TRUE                  | FALSE                | FALSE                          | TRUE             | FALSE                        | FALSE        |
| Ahimastos              | JAMA                            | TRUE                  | TRUE                 | FALSE                          | TRUE             | FALSE                        | FALSE        |
| Ainsworth              | Rheumatology                    | FALSE                 | FALSE                | FALSE                          | FALSE            | FALSE                        | TRUE         |
| Ajalloueyan            | Arch Otolaryngol Head Neck Surg | FALSE                 | FALSE                | FALSE                          | FALSE            | FALSE                        | TRUE         |
| Albert                 | J Bone Joint Surg Br            | TRUE                  | FALSE                | TRUE                           | TRUE             | FALSE                        | FALSE        |
| Albo                   | NEJM                            | FALSE                 | TRUE                 | FALSE                          | FALSE            | FALSE                        | FALSE        |
| Alho                   | BMJ                             | FALSE                 | FALSE                | FALSE                          | FALSE            | TRUE                         | FALSE        |
| Andang'o               | Lancet                          | TRUE                  | FALSE                | FALSE                          | TRUE             | FALSE                        | FALSE        |
| Anderson               | JAMA                            | FALSE                 | TRUE                 | FALSE                          | FALSE            | FALSE                        | FALSE        |
| APEX AMI Investigators | JAMA                            | TRUE                  | FALSE                | FALSE                          | TRUE             | FALSE                        | FALSE        |
| Aquad                  | Anesthesiology                  | FALSE                 | FALSE                | FALSE                          | FALSE            | TRUE                         | FALSE        |
| Astermark              | Blood                           | TRUE                  | FALSE                | FALSE                          | TRUE             | FALSE                        | FALSE        |
| Ayan                   | J Urol                          | FALSE                 | FALSE                | FALSE                          | FALSE            | FALSE                        | TRUE         |
| Bailey                 | Lancet                          | FALSE                 | TRUE                 | FALSE                          | FALSE            | FALSE                        | FALSE        |
| Ballantyne             | Am J Cardiol                    | TRUE                  | FALSE                | TRUE                           | TRUE             | FALSE                        | FALSE        |
| Banikazemi             | Ann Intern Med                  | TRUE                  | TRUE                 | FALSE                          | TRUE             | FALSE                        | FALSE        |
| Banks                  | Am J Obstet Gynecol             | FALSE                 | FALSE                | FALSE                          | FALSE            | FALSE                        | TRUE         |
| Banu                   | BMJ                             | FALSE                 | TRUE                 | FALSE                          | FALSE            | FALSE                        | FALSE        |
| Barak                  | Anaesthesia                     | FALSE                 | FALSE                | FALSE                          | FALSE            | FALSE                        | TRUE         |
| Barter                 | NEJM                            | TRUE                  | FALSE                | FALSE                          | TRUE             | FALSE                        | FALSE        |
| Bashshur               | Arch Ophthalmol                 | FALSE                 | FALSE                | FALSE                          | FALSE            | FALSE                        | TRUE         |
| Bassett                | Physical Therapy                | FALSE                 | FALSE                | TRUE                           | FALSE            | FALSE                        | FALSE        |
| Batisky                | J Pediatr                       | TRUE                  | FALSE                | FALSE                          | TRUE             | FALSE                        | FALSE        |

|                          |                      |       |       |       |       |       |       |
|--------------------------|----------------------|-------|-------|-------|-------|-------|-------|
| Beaupre                  | J Bone Joint Surg Am | TRUE  | FALSE | FALSE | TRUE  | FALSE | FALSE |
| Bech                     | BMJ                  | FALSE | FALSE | TRUE  | FALSE | FALSE | FALSE |
| Bell                     | Am J Obstet Gynecol  | FALSE | FALSE | TRUE  | FALSE | FALSE | FALSE |
| Belshe                   | NEJM                 | TRUE  | FALSE | FALSE | TRUE  | FALSE | FALSE |
| Berlucchi                | Pediatrics           | FALSE | FALSE | FALSE | FALSE | FALSE | TRUE  |
| Berlucchi                | Pediatrics           | FALSE | FALSE | FALSE | FALSE | FALSE | TRUE  |
| Bhagat                   | J Urol               | FALSE | FALSE | FALSE | FALSE | FALSE | TRUE  |
| Biai                     | BMJ                  | FALSE | FALSE | FALSE | FALSE | TRUE  | FALSE |
| Black                    | NEJM                 | TRUE  | FALSE | FALSE | TRUE  | FALSE | FALSE |
| Bleyen                   | Am J Ophthalmol      | FALSE | FALSE | TRUE  | FALSE | FALSE | FALSE |
| Bolton                   | JAMA                 | FALSE | FALSE | TRUE  | FALSE | FALSE | FALSE |
| Borland                  | Ann Emerg Med        | TRUE  | FALSE | FALSE | TRUE  | FALSE | FALSE |
| Botoni                   | Am Heart J           | TRUE  | FALSE | TRUE  | TRUE  | FALSE | FALSE |
| Brandes                  | JAMA                 | TRUE  | FALSE | FALSE | TRUE  | FALSE | FALSE |
| Brandes                  | JAMA                 | TRUE  | FALSE | FALSE | TRUE  | FALSE | FALSE |
| Briguori                 | Circulation          | FALSE | FALSE | FALSE | FALSE | FALSE | TRUE  |
| Brisinda                 | Br J Surg            | FALSE | FALSE | FALSE | FALSE | FALSE | TRUE  |
| Brotman                  | Arch Gen Psychiatry  | FALSE | TRUE  | FALSE | FALSE | FALSE | FALSE |
| Brown                    | BMJ                  | TRUE  | TRUE  | TRUE  | TRUE  | FALSE | FALSE |
| Bulkmans                 | Lancet               | FALSE | TRUE  | FALSE | FALSE | FALSE | FALSE |
| Burns                    | Lancet               | FALSE | TRUE  | FALSE | FALSE | FALSE | FALSE |
| Bussel                   | NEJM                 | TRUE  | FALSE | FALSE | TRUE  | FALSE | FALSE |
| Campbell                 | BMJ                  | TRUE  | FALSE | FALSE | TRUE  | FALSE | FALSE |
| Can Ortho Trauma Society | J Bone Joint Surg Am | TRUE  | FALSE | TRUE  | TRUE  | FALSE | FALSE |
| Canani                   | BMJ                  | FALSE | FALSE | FALSE | FALSE | TRUE  | FALSE |
| Carlson                  | J Am Diet Assoc      | FALSE | FALSE | TRUE  | FALSE | FALSE | FALSE |
| Casati                   | Anesthesiology       | FALSE | FALSE | FALSE | FALSE | TRUE  | FALSE |
| Catovsky                 | Lancet               | TRUE  | FALSE | TRUE  | TRUE  | FALSE | FALSE |
| Chan                     | Ann Intern Med       | TRUE  | FALSE | FALSE | TRUE  | FALSE | FALSE |

|                |                          |       |       |       |       |       |       |
|----------------|--------------------------|-------|-------|-------|-------|-------|-------|
| Chan           | BJOG                     | FALSE | FALSE | FALSE | FALSE | FALSE | FALSE |
| Chan           | Lancet                   | FALSE | TRUE  | FALSE | FALSE | FALSE | FALSE |
| Chan           | Pediatrics               | FALSE | TRUE  | FALSE | FALSE | FALSE | FALSE |
| Chang          | Arch Ophthalmol          | TRUE  | FALSE | FALSE | TRUE  | FALSE | FALSE |
| Chapman        | J Am Coll Surg           | TRUE  | FALSE | FALSE | TRUE  | FALSE | FALSE |
| Charles        | J Allerg Clin Immunol    | TRUE  | FALSE | FALSE | TRUE  | FALSE | FALSE |
| Choi           | J Thorac Cardiovasc Surg | FALSE | FALSE | FALSE | FALSE | FALSE | TRUE  |
| Church         | JAMA                     | TRUE  | TRUE  | FALSE | TRUE  | FALSE | FALSE |
| Cinnella       | Plast Recons Surg        | FALSE | TRUE  | FALSE | FALSE | FALSE | FALSE |
| Clark          | Chest                    | FALSE | TRUE  | FALSE | FALSE | FALSE | FALSE |
| Cohen          | Anesthesiology           | FALSE | FALSE | TRUE  | FALSE | FALSE | FALSE |
| Cohen          | Arthritis Rheum          | FALSE | FALSE | TRUE  | FALSE | FALSE | FALSE |
| Cole           | JAMA                     | FALSE | TRUE  | FALSE | FALSE | FALSE | FALSE |
| Collins        | Am J Ophthalmol          | FALSE | FALSE | FALSE | FALSE | TRUE  | FALSE |
| Colombel       | Gastroenterology         | TRUE  | FALSE | FALSE | TRUE  | FALSE | FALSE |
| Conlon         | Anesth Analg             | FALSE | FALSE | TRUE  | FALSE | FALSE | FALSE |
| Conter         | Lancet                   | FALSE | TRUE  | FALSE | FALSE | FALSE | FALSE |
| Coombes        | Lancet                   | TRUE  | FALSE | FALSE | TRUE  | FALSE | FALSE |
| Corneli        | NEJM                     | FALSE | TRUE  | FALSE | FALSE | FALSE | FALSE |
| Cornely        | NEJM                     | TRUE  | FALSE | FALSE | TRUE  | FALSE | FALSE |
| Corwin         | NEJM                     | TRUE  | FALSE | FALSE | TRUE  | FALSE | FALSE |
| Counsell       | JAMA                     | FALSE | TRUE  | TRUE  | FALSE | FALSE | FALSE |
| Cox            | NEJM                     | TRUE  | FALSE | FALSE | TRUE  | FALSE | FALSE |
| Crisafulli     | Chest                    | FALSE | FALSE | FALSE | FALSE | FALSE | TRUE  |
| Croghan        | Mayo Clin Proceed        | FALSE | TRUE  | FALSE | FALSE | FALSE | FALSE |
| Crouse         | JAMA                     | TRUE  | FALSE | FALSE | TRUE  | FALSE | FALSE |
| Culleton       | JAMA                     | FALSE | FALSE | TRUE  | FALSE | FALSE | FALSE |
| Dal Bello-Haas | Neurology                | FALSE | FALSE | TRUE  | FALSE | FALSE | FALSE |
| Daniels        | Pediatrics               | TRUE  | FALSE | FALSE | TRUE  | FALSE | FALSE |
| Dao            | BJOG                     | FALSE | FALSE | TRUE  | FALSE | FALSE | FALSE |

|                |                          |       |       |       |       |       |       |
|----------------|--------------------------|-------|-------|-------|-------|-------|-------|
| Davis          | J Gerontol               | FALSE | TRUE  | FALSE | FALSE | FALSE | FALSE |
| Dawood         | Am J Obstet Gynecol      | TRUE  | FALSE | FALSE | TRUE  | FALSE | FALSE |
| de la Porte    | Heart                    | TRUE  | FALSE | FALSE | TRUE  | FALSE | FALSE |
| Deitch         | Ann Emerg Med            | FALSE | FALSE | FALSE | FALSE | TRUE  | FALSE |
| DeJonge        | J pediatr                | TRUE  | FALSE | FALSE | TRUE  | FALSE | FALSE |
| Dember         | NEJM                     | TRUE  | FALSE | FALSE | TRUE  | FALSE | FALSE |
| Demory         | Crit Care Med            | FALSE | TRUE  | FALSE | FALSE | FALSE | FALSE |
| Dhonneur       | Anaesthesia              | FALSE | FALSE | TRUE  | FALSE | FALSE | FALSE |
| Difede         | J Nerv Ment Dis          | FALSE | TRUE  | FALSE | FALSE | FALSE | FALSE |
| Dimaano        | Am J Trop Med Hyg        | FALSE | TRUE  | FALSE | FALSE | FALSE | FALSE |
| Dimopoulos     | NEJM                     | TRUE  | FALSE | FALSE | TRUE  | FALSE | FALSE |
| Domingo-Triado | Anesth Analg             | FALSE | FALSE | FALSE | FALSE | FALSE | TRUE  |
| Dondorp        | J Infect Dis             | FALSE | FALSE | TRUE  | FALSE | FALSE | FALSE |
| Donesky-Cuenco | Heart Lung               | FALSE | TRUE  | FALSE | FALSE | FALSE | FALSE |
| Dorsey         | JAMA                     | FALSE | TRUE  | FALSE | FALSE | FALSE | FALSE |
| Dracup         | Am Heart J               | FALSE | FALSE | TRUE  | FALSE | FALSE | FALSE |
| Durga          | Ann Intern Med           | FALSE | TRUE  | TRUE  | FALSE | FALSE | FALSE |
| Durga          | Lancet                   | FALSE | TRUE  | FALSE | FALSE | FALSE | FALSE |
| Dyson-Hudson   | Arch Phys Med Rehab      | FALSE | FALSE | TRUE  | FALSE | FALSE | FALSE |
| Ebbeling       | JAMA                     | FALSE | TRUE  | TRUE  | FALSE | FALSE | FALSE |
| Ekberg         | NEJM                     | TRUE  | FALSE | FALSE | TRUE  | FALSE | FALSE |
| Ensini         | Clin Orthop Relat Res    | FALSE | FALSE | FALSE | FALSE | FALSE | TRUE  |
| Eogan          | BJOG                     | FALSE | TRUE  | FALSE | FALSE | FALSE | FALSE |
| Epstein        | Arch Pediatr Adolesc Med | FALSE | TRUE  | FALSE | FALSE | FALSE | FALSE |
| Erbil          | J Clin Endocrin Metab    | FALSE | FALSE | FALSE | FALSE | FALSE | TRUE  |
| Escudier       | Lancet                   | TRUE  | FALSE | FALSE | TRUE  | FALSE | FALSE |
| Escudier       | NEJM                     | TRUE  | FALSE | FALSE | TRUE  | FALSE | FALSE |
| Estok          | Nursing research         | FALSE | TRUE  | FALSE | FALSE | FALSE | FALSE |
| Facon          | Lancet                   | TRUE  | TRUE  | TRUE  | TRUE  | FALSE | FALSE |
| Falutz         | NEJM                     | TRUE  | FALSE | FALSE | TRUE  | FALSE | FALSE |



|             |                                  |       |       |       |       |       |       |
|-------------|----------------------------------|-------|-------|-------|-------|-------|-------|
| Farmer      | BMJ                              | FALSE | TRUE  | FALSE | FALSE | FALSE | FALSE |
| Fawzi       | NEJM                             | FALSE | TRUE  | FALSE | FALSE | FALSE | FALSE |
| Ferme       | NEJM                             | FALSE | TRUE  | TRUE  | FALSE | FALSE | FALSE |
| Ferme       | NEJM                             | FALSE | TRUE  | TRUE  | FALSE | FALSE | FALSE |
| Flachskampf | Circulation                      | FALSE | FALSE | TRUE  | FALSE | FALSE | FALSE |
| Fonseca     | NEJM                             | FALSE | TRUE  | FALSE | FALSE | FALSE | FALSE |
| Ford        | NEJM                             | TRUE  | FALSE | FALSE | TRUE  | FALSE | FALSE |
| Foss        | Anesthesiology                   | FALSE | FALSE | TRUE  | FALSE | FALSE | FALSE |
| Foster      | BMJ                              | FALSE | TRUE  | TRUE  | FALSE | FALSE | FALSE |
| Fox         | Ann Intern Med                   | TRUE  | FALSE | FALSE | TRUE  | FALSE | FALSE |
| Francois    | Lancet                           | FALSE | FALSE | FALSE | FALSE | FALSE | FALSE |
| Frank       | Am J Psychiatry                  | FALSE | TRUE  | FALSE | FALSE | FALSE | FALSE |
| FUTURE II   | NEJM                             | TRUE  | FALSE | FALSE | TRUE  | FALSE | FALSE |
| Gacci       | J Urol                           | FALSE | FALSE | FALSE | FALSE | FALSE | TRUE  |
| Gallo       | Ann Intern Med                   | FALSE | TRUE  | FALSE | FALSE | FALSE | FALSE |
| Gan         | Anesth Analg                     | TRUE  | FALSE | FALSE | TRUE  | FALSE | FALSE |
| Gandhi      | Ann Intern Med                   | TRUE  | FALSE | TRUE  | TRUE  | FALSE | FALSE |
| Gardner     | JAMA                             | FALSE | TRUE  | FALSE | FALSE | FALSE | FALSE |
| Garg        | Pediatrics                       | FALSE | TRUE  | TRUE  | FALSE | FALSE | FALSE |
| Garland     | NEJM                             | TRUE  | FALSE | FALSE | TRUE  | FALSE | FALSE |
| Geohas      | Am J Med Sci                     | TRUE  | FALSE | FALSE | TRUE  | FALSE | FALSE |
| Gheorghide  | JAMA                             | TRUE  | FALSE | FALSE | TRUE  | FALSE | FALSE |
| Gheorghide  | JAMA                             | TRUE  | FALSE | FALSE | TRUE  | FALSE | FALSE |
| Gilligan    | Lancet                           | FALSE | TRUE  | FALSE | FALSE | FALSE | FALSE |
| Giugliano   | J Am Coll Cardiol                | TRUE  | FALSE | FALSE | TRUE  | FALSE | FALSE |
| Glazebrook  | Arch Dis Child Fetal Neonatal Ed | FALSE | FALSE | TRUE  | FALSE | FALSE | FALSE |
| Glynn       | Ann Intern Med                   | TRUE  | TRUE  | FALSE | TRUE  | FALSE | FALSE |
| Gohel       | BMJ                              | FALSE | TRUE  | TRUE  | FALSE | FALSE | FALSE |
| Goodyer     | BMJ                              | FALSE | TRUE  | TRUE  | FALSE | FALSE | FALSE |

|             |                     |       |       |       |       |       |       |
|-------------|---------------------|-------|-------|-------|-------|-------|-------|
| Gottlieb    | Am Heart J          | TRUE  | TRUE  | TRUE  | TRUE  | FALSE | FALSE |
| Gray        | Lancet              | FALSE | TRUE  | TRUE  | FALSE | FALSE | FALSE |
| Greenfield  | J Urol              | FALSE | FALSE | FALSE | FALSE | FALSE | TRUE  |
| Greenland   | Anaesthesia         | FALSE | FALSE | FALSE | FALSE | FALSE | TRUE  |
| Greenspan   | Ann Intern Med      | TRUE  | TRUE  | FALSE | TRUE  | FALSE | FALSE |
| Greenspan   | Ann Intern Med      | TRUE  | FALSE | FALSE | TRUE  | FALSE | FALSE |
| Greeven     | Am J Psychiatry     | TRUE  | FALSE | FALSE | TRUE  | FALSE | FALSE |
| Griffiths   | Lancet              | FALSE | TRUE  | TRUE  | FALSE | FALSE | FALSE |
| Grinsztejn  | Lancet              | TRUE  | FALSE | FALSE | TRUE  | FALSE | FALSE |
| Grobusch    | J Infect Dis        | FALSE | TRUE  | TRUE  | FALSE | FALSE | FALSE |
| Guarino     | Gut                 | FALSE | TRUE  | FALSE | FALSE | FALSE | FALSE |
| Guazzi      | J Am Coll Cardiol   | FALSE | FALSE | TRUE  | FALSE | FALSE | FALSE |
| Gudziol     | J Urol              | FALSE | FALSE | FALSE | FALSE | FALSE | TRUE  |
| Gupta       | Heart               | FALSE | FALSE | TRUE  | FALSE | FALSE | FALSE |
| Gurbel      | Circulation         | TRUE  | FALSE | TRUE  | TRUE  | FALSE | FALSE |
| Halonen     | JAMA                | FALSE | FALSE | TRUE  | FALSE | FALSE | FALSE |
| Hamar       | Obstet Gynecol      | FALSE | FALSE | FALSE | FALSE | TRUE  | FALSE |
| Hancock     | Lancet              | TRUE  | TRUE  | FALSE | TRUE  | FALSE | FALSE |
| Han-Geurts  | Br J Surg           | FALSE | FALSE | FALSE | FALSE | FALSE | TRUE  |
| Hansen      | Am J Obstet Gynecol | TRUE  | FALSE | TRUE  | TRUE  | FALSE | FALSE |
| Hausenloy   | Lancet              | FALSE | TRUE  | FALSE | FALSE | FALSE | FALSE |
| Hayward     | Nursing Research    | FALSE | FALSE | FALSE | FALSE | FALSE | TRUE  |
| Heijnen     | Lancet              | FALSE | TRUE  | FALSE | FALSE | FALSE | FALSE |
| Heinstad    | Obstet Gynecol      | FALSE | FALSE | FALSE | FALSE | FALSE | TRUE  |
| Henderson   | BMJ                 | FALSE | TRUE  | FALSE | FALSE | FALSE | FALSE |
| Hendrickson | J Am Diet Assoc     | FALSE | TRUE  | FALSE | FALSE | FALSE | FALSE |
| Herroeder   | Ann Surg            | FALSE | FALSE | TRUE  | FALSE | FALSE | FALSE |
| Heyde       | Circulation         | FALSE | TRUE  | FALSE | FALSE | FALSE | FALSE |
| Hickson     | BMJ                 | TRUE  | FALSE | TRUE  | TRUE  | FALSE | FALSE |
| Hill        | Am J Clin Nutr      | TRUE  | FALSE | TRUE  | TRUE  | FALSE | FALSE |

|                |                       |       |       |       |       |       |       |
|----------------|-----------------------|-------|-------|-------|-------|-------|-------|
| Hill           | BMJ                   | FALSE | TRUE  | TRUE  | FALSE | FALSE | FALSE |
| Hirsch         | Lancet                | TRUE  | FALSE | TRUE  | TRUE  | FALSE | FALSE |
| Holland        | BMJ                   | TRUE  | TRUE  | TRUE  | TRUE  | FALSE | FALSE |
| Holman         | NEJM                  | TRUE  | FALSE | TRUE  | TRUE  | FALSE | FALSE |
| Home           | NEJM                  | TRUE  | FALSE | FALSE | TRUE  | FALSE | FALSE |
| Hopkins        | J Urol                | FALSE | TRUE  | FALSE | FALSE | FALSE | FALSE |
| Howard         | NEJM                  | FALSE | TRUE  | TRUE  | FALSE | FALSE | FALSE |
| Howden-Chapman | BMJ                   | TRUE  | TRUE  | TRUE  | TRUE  | FALSE | FALSE |
| Hsia           | Circulation           | FALSE | TRUE  | FALSE | FALSE | FALSE | FALSE |
| Hudes          | NEJM                  | TRUE  | FALSE | FALSE | TRUE  | FALSE | FALSE |
| Huf            | BMJ                   | FALSE | TRUE  | FALSE | FALSE | FALSE | FALSE |
| Huybregts      | Ann Thorac Surg       | FALSE | FALSE | TRUE  | FALSE | FALSE | FALSE |
| Iijima         | Anesth Analg          | FALSE | FALSE | FALSE | FALSE | FALSE | TRUE  |
| Immenroth      | Ann Surg              | TRUE  | FALSE | TRUE  | TRUE  | FALSE | FALSE |
| Isenring       | J Am Diet Assoc       | FALSE | FALSE | TRUE  | FALSE | FALSE | FALSE |
| Itoi           | J Bone Joint Surg Am  | TRUE  | FALSE | FALSE | TRUE  | FALSE | FALSE |
| Jaccard        | NEJM                  | FALSE | FALSE | TRUE  | FALSE | FALSE | FALSE |
| James          | BMJ                   | FALSE | FALSE | TRUE  | FALSE | FALSE | FALSE |
| Jamison        | JAMA                  | FALSE | TRUE  | FALSE | FALSE | FALSE | FALSE |
| Jannelli       | Am J Obstet Gynecol   | FALSE | FALSE | FALSE | FALSE | FALSE | TRUE  |
| Jeschke        | Ann Surg              | FALSE | TRUE  | TRUE  | FALSE | FALSE | FALSE |
| Jeschke        | J Trauma              | FALSE | TRUE  | TRUE  | FALSE | FALSE | FALSE |
| Jialal         | J Clin Endocrin Metab | FALSE | TRUE  | TRUE  | FALSE | FALSE | FALSE |
| John           | Anaesthesia           | FALSE | FALSE | FALSE | FALSE | FALSE | TRUE  |
| Johnson        | JAMA                  | TRUE  | FALSE | FALSE | TRUE  | FALSE | FALSE |
| Johnston       | Pediatrics            | FALSE | TRUE  | FALSE | FALSE | FALSE | FALSE |
| Jonker         | NEJM                  | TRUE  | FALSE | TRUE  | TRUE  | FALSE | FALSE |
| Jonnavithula   | Anaesthesia           | FALSE | FALSE | FALSE | FALSE | FALSE | TRUE  |
| Kaiser         | Am J Ophthalmol       | TRUE  | FALSE | FALSE | TRUE  | FALSE | FALSE |
| Kaiser         | J Allerg Clin Immunol | TRUE  | FALSE | FALSE | TRUE  | FALSE | FALSE |

|               |                          |       |       |       |       |       |       |
|---------------|--------------------------|-------|-------|-------|-------|-------|-------|
| Kamm          | Gastroenterology         | TRUE  | FALSE | FALSE | TRUE  | FALSE | FALSE |
| Kappos        | Lancet                   | TRUE  | FALSE | FALSE | TRUE  | FALSE | FALSE |
| Karolak       | Am Heart J               | FALSE | FALSE | TRUE  | FALSE | FALSE | FALSE |
| Kastelein     | NEJM                     | TRUE  | FALSE | FALSE | TRUE  | FALSE | FALSE |
| Keech         | Lancet                   | TRUE  | TRUE  | FALSE | TRUE  | FALSE | FALSE |
| Keefe         | Am J Psychiatry          | TRUE  | FALSE | FALSE | TRUE  | FALSE | FALSE |
| Keime-Guibert | NEJM                     | FALSE | FALSE | TRUE  | FALSE | FALSE | FALSE |
| Kemeny        | J Allerg Clin Immunol    | FALSE | FALSE | TRUE  | FALSE | FALSE | FALSE |
| Kempainen     | Chest                    | FALSE | TRUE  | TRUE  | FALSE | FALSE | FALSE |
| Keramidas     | Plast Recons Surg        | FALSE | FALSE | FALSE | FALSE | TRUE  | FALSE |
| Khan          | Lancet                   | FALSE | FALSE | TRUE  | FALSE | FALSE | FALSE |
| Khanal        | Am J Med                 | TRUE  | FALSE | TRUE  | TRUE  | FALSE | FALSE |
| Khoo          | Ann Surg                 | FALSE | FALSE | FALSE | FALSE | FALSE | TRUE  |
| Khoury        | BJOG                     | FALSE | FALSE | FALSE | FALSE | FALSE | TRUE  |
| Kianifard     | Br J Surg                | FALSE | FALSE | TRUE  | FALSE | FALSE | FALSE |
| Kim           | Ann Intern Med           | FALSE | TRUE  | FALSE | FALSE | FALSE | FALSE |
| Kim           | Circulation              | FALSE | TRUE  | TRUE  | FALSE | FALSE | FALSE |
| Kimberger     | Anaesthesia              | FALSE | FALSE | FALSE | FALSE | FALSE | TRUE  |
| Kitakaze      | Lancet                   | FALSE | TRUE  | TRUE  | FALSE | FALSE | FALSE |
| Kitakaze      | Lancet                   | FALSE | TRUE  | TRUE  | FALSE | FALSE | FALSE |
| Kjekshus      | NEJM                     | TRUE  | FALSE | FALSE | TRUE  | FALSE | FALSE |
| Klinnert      | Arch Pediatr Adolesc Med | FALSE | TRUE  | FALSE | FALSE | FALSE | FALSE |
| Koc           | Anesth Analg             | FALSE | FALSE | FALSE | FALSE | FALSE | TRUE  |
| Kocher        | J Bone Joint Surg Am     | TRUE  | FALSE | FALSE | TRUE  | FALSE | FALSE |
| Kochiadakis   | Am J Cardiol             | FALSE | FALSE | FALSE | FALSE | FALSE | TRUE  |
| Koh           | BMJ                      | FALSE | FALSE | TRUE  | FALSE | FALSE | FALSE |
| Kondo         | Am J Roentgenol          | FALSE | TRUE  | FALSE | FALSE | FALSE | FALSE |
| Konduri       | J Pediatr                | TRUE  | TRUE  | FALSE | TRUE  | FALSE | FALSE |
| Konstam       | JAMA                     | TRUE  | FALSE | FALSE | TRUE  | FALSE | FALSE |

|                |                          |       |       |       |       |       |       |
|----------------|--------------------------|-------|-------|-------|-------|-------|-------|
| Koo            | Lancet                   | FALSE | TRUE  | TRUE  | FALSE | FALSE | FALSE |
| Kool           | Arch Phys Med Rehab      | FALSE | TRUE  | FALSE | FALSE | FALSE | FALSE |
| Kottink        | Arch Phys Med Rehab      | FALSE | TRUE  | FALSE | FALSE | FALSE | FALSE |
| Kramer         | BMJ                      | FALSE | TRUE  | FALSE | FALSE | FALSE | FALSE |
| Krueger        | NEJM                     | TRUE  | FALSE | FALSE | TRUE  | FALSE | FALSE |
| Krupitsky      | Am J Psychiatry          | FALSE | TRUE  | FALSE | FALSE | FALSE | FALSE |
| Kuppermann     | Arch Ophthalmol          | TRUE  | FALSE | FALSE | TRUE  | FALSE | FALSE |
| Kuse           | Lancet                   | TRUE  | FALSE | FALSE | TRUE  | FALSE | FALSE |
| LaCroix        | NEJM                     | FALSE | TRUE  | FALSE | FALSE | FALSE | FALSE |
| Landry         | Pediatrics               | FALSE | TRUE  | FALSE | FALSE | FALSE | FALSE |
| Larsen         | NEJM                     | TRUE  | TRUE  | TRUE  | TRUE  | FALSE | FALSE |
| Lau            | NEJM                     | FALSE | FALSE | TRUE  | FALSE | FALSE | FALSE |
| Lautrette      | NEJM                     | TRUE  | TRUE  | TRUE  | TRUE  | FALSE | FALSE |
| Lazzarin       | Lancet                   | TRUE  | FALSE | FALSE | TRUE  | FALSE | FALSE |
| Leardi         | Br J Surg                | FALSE | FALSE | FALSE | FALSE | FALSE | TRUE  |
| Lee            | Am J Public Health       | FALSE | TRUE  | FALSE | FALSE | FALSE | FALSE |
| Legro          | NEJM                     | FALSE | TRUE  | FALSE | FALSE | FALSE | FALSE |
| Leslie         | JAMA                     | TRUE  | FALSE | FALSE | TRUE  | FALSE | FALSE |
| Lesperance     | JAMA                     | TRUE  | TRUE  | TRUE  | TRUE  | FALSE | FALSE |
| Levin          | Lancet                   | TRUE  | FALSE | FALSE | TRUE  | FALSE | FALSE |
| Levy           | Lancet                   | TRUE  | FALSE | FALSE | TRUE  | FALSE | FALSE |
| Lilleri        | Blood                    | FALSE | TRUE  | FALSE | FALSE | FALSE | FALSE |
| Llanos-Cuentas | Am J Trop Med Hyg        | FALSE | FALSE | TRUE  | FALSE | FALSE | FALSE |
| Longobardi     | Am J Cardiol             | FALSE | FALSE | FALSE | FALSE | FALSE | TRUE  |
| Lukaszuk       | J Am Diet Assoc          | FALSE | FALSE | TRUE  | FALSE | FALSE | FALSE |
| Lunde          | Am Heart J               | FALSE | FALSE | FALSE | FALSE | FALSE | TRUE  |
| Luo            | J Thorac Cardiovasc Surg | FALSE | FALSE | FALSE | FALSE | FALSE | TRUE  |
| Madrugá        | Lancet                   | TRUE  | FALSE | FALSE | TRUE  | FALSE | FALSE |
| Madrugá        | Lancet                   | TRUE  | FALSE | FALSE | TRUE  | FALSE | FALSE |

|                |                           |       |       |       |       |       |       |
|----------------|---------------------------|-------|-------|-------|-------|-------|-------|
| Maharaj        | Anesthesiology            | TRUE  | TRUE  | FALSE | TRUE  | FALSE | FALSE |
| Mahmoud        | Ann Intern Med            | TRUE  | FALSE | FALSE | TRUE  | FALSE | FALSE |
| Maki           | Neurology                 | TRUE  | FALSE | FALSE | TRUE  | FALSE | FALSE |
| Maki-Petaja    | J Am Coll Cardiol         | FALSE | FALSE | TRUE  | FALSE | FALSE | FALSE |
| Malhotra-Kumar | Lancet                    | TRUE  | FALSE | FALSE | TRUE  | FALSE | FALSE |
| Man            | Phys Therap               | FALSE | FALSE | FALSE | FALSE | FALSE | TRUE  |
| Manco-Johnson  | NEJM                      | TRUE  | TRUE  | FALSE | TRUE  | FALSE | FALSE |
| Mant           | Lancet                    | FALSE | TRUE  | FALSE | FALSE | FALSE | FALSE |
| Manzoni        | NEJM                      | TRUE  | FALSE | FALSE | TRUE  | FALSE | FALSE |
| Marini         | Ann Intern Med            | FALSE | TRUE  | FALSE | FALSE | FALSE | FALSE |
| Mark           | J Infect Dis              | TRUE  | TRUE  | FALSE | TRUE  | FALSE | FALSE |
| Martineau      | Am J Respir Crit Care Med | FALSE | FALSE | TRUE  | FALSE | FALSE | FALSE |
| Mason          | BMJ                       | FALSE | FALSE | TRUE  | FALSE | FALSE | FALSE |
| Mastenbroek    | NEJM                      | FALSE | TRUE  | FALSE | FALSE | FALSE | FALSE |
| Mayer          | Am J Public Health        | FALSE | TRUE  | FALSE | FALSE | FALSE | FALSE |
| Mayer          | Anesth Analg              | FALSE | FALSE | FALSE | FALSE | FALSE | TRUE  |
| Mayrand        | NEJM                      | TRUE  | TRUE  | FALSE | TRUE  | FALSE | FALSE |
| McCann         | Lancet                    | FALSE | TRUE  | FALSE | FALSE | FALSE | FALSE |
| McGurk         | Am J Psychiatry           | FALSE | FALSE | TRUE  | FALSE | FALSE | FALSE |
| McHutchinson   | NEJM                      | TRUE  | FALSE | FALSE | TRUE  | FALSE | FALSE |
| Mebazaa        | JAMA                      | TRUE  | FALSE | FALSE | TRUE  | FALSE | FALSE |
| Michalek       | Anesth Analg              | TRUE  | FALSE | FALSE | TRUE  | FALSE | FALSE |
| Miller         | NEJM                      | TRUE  | TRUE  | FALSE | TRUE  | FALSE | FALSE |
| Miller         | Heart Lung                | FALSE | FALSE | TRUE  | FALSE | FALSE | FALSE |
| Mittermayer    | J Clin Endocrin Metab     | FALSE | FALSE | FALSE | FALSE | FALSE | TRUE  |
| Mittermayr     | Anesth Analg              | TRUE  | FALSE | FALSE | TRUE  | FALSE | FALSE |
| Mochizuki      | Lancet                    | TRUE  | TRUE  | FALSE | TRUE  | FALSE | FALSE |
| Moghrabi       | Blood                     | FALSE | TRUE  | FALSE | FALSE | FALSE | FALSE |
| Montano        | J Clin Endocrin Metab     | FALSE | TRUE  | FALSE | FALSE | FALSE | FALSE |

|               |                           |       |       |       |       |       |       |
|---------------|---------------------------|-------|-------|-------|-------|-------|-------|
| Montgomery    | BMJ                       | FALSE | FALSE | TRUE  | FALSE | FALSE | FALSE |
| Montini       | BMJ                       | FALSE | TRUE  | TRUE  | FALSE | FALSE | FALSE |
| Montuschi     | Chest                     | TRUE  | TRUE  | FALSE | TRUE  | FALSE | FALSE |
| Morice        | J Am Coll Cardiol         | TRUE  | FALSE | FALSE | TRUE  | FALSE | FALSE |
| Morice        | Am J Respir Crit Care Med | FALSE | FALSE | FALSE | FALSE | FALSE | TRUE  |
| Morrow        | JAMA                      | TRUE  | FALSE | FALSE | TRUE  | FALSE | FALSE |
| Motallebzadeh | Ann Thorac Surg           | FALSE | TRUE  | FALSE | FALSE | FALSE | FALSE |
| Motzer        | NEJM                      | TRUE  | FALSE | FALSE | TRUE  | FALSE | FALSE |
| Mourot        | Arch Phys Med Rehab       | FALSE | TRUE  | FALSE | FALSE | FALSE | FALSE |
| Mukamal       | Am Heart J                | TRUE  | TRUE  | TRUE  | TRUE  | FALSE | FALSE |
| Murphy        | Anesth Analg              | FALSE | FALSE | TRUE  | FALSE | FALSE | FALSE |
| Murray-Colb   | Am J Clin Nutr            | FALSE | TRUE  | TRUE  | FALSE | FALSE | FALSE |
| Mutty         | J Bone Joint Surg Am      | FALSE | FALSE | FALSE | FALSE | TRUE  | FALSE |
| Myers         | Am Heart J                | FALSE | FALSE | TRUE  | FALSE | FALSE | FALSE |
| Nadel         | Lancet                    | TRUE  | FALSE | FALSE | TRUE  | FALSE | FALSE |
| Naja          | J Laryngol Otol           | FALSE | FALSE | FALSE | FALSE | FALSE | TRUE  |
| Naucner       | NEJM                      | FALSE | TRUE  | FALSE | FALSE | FALSE | FALSE |
| Neuberger     | Arthritis Rheum           | FALSE | TRUE  | FALSE | FALSE | FALSE | FALSE |
| Newburger     | NEJM                      | FALSE | TRUE  | TRUE  | FALSE | FALSE | FALSE |
| Nguyen        | NEJM                      | FALSE | FALSE | TRUE  | FALSE | FALSE | FALSE |
| Nissen        | JAMA                      | TRUE  | FALSE | FALSE | TRUE  | FALSE | FALSE |
| Nissen        | JAMA                      | TRUE  | FALSE | FALSE | TRUE  | FALSE | FALSE |
| Nissen        | NEJM                      | TRUE  | FALSE | FALSE | TRUE  | FALSE | FALSE |
| Ntab          | Am J Trop Med Hyg         | FALSE | FALSE | TRUE  | FALSE | FALSE | FALSE |
| Olshansky     | Circulation               | TRUE  | FALSE | FALSE | TRUE  | FALSE | FALSE |
| O'Neill       | Arch Phys Med Rehab       | FALSE | FALSE | FALSE | FALSE | FALSE | TRUE  |
| Oparil        | Lancet                    | TRUE  | FALSE | FALSE | TRUE  | FALSE | FALSE |
| Paavonen      | Lancet                    | FALSE | FALSE | FALSE | FALSE | FALSE | FALSE |
| Padian        | Lancet                    | FALSE | FALSE | TRUE  | FALSE | FALSE | FALSE |

|                      |                       |       |       |       |       |       |       |
|----------------------|-----------------------|-------|-------|-------|-------|-------|-------|
| Pajno                | J Allerg Clin Immunol | FALSE | FALSE | FALSE | FALSE | FALSE | TRUE  |
| Pan                  | Am Heart J            | FALSE | FALSE | TRUE  | FALSE | FALSE | FALSE |
| Pandey               | JAMA                  | FALSE | FALSE | TRUE  | FALSE | FALSE | FALSE |
| Pandharipande        | JAMA                  | TRUE  | FALSE | FALSE | TRUE  | FALSE | FALSE |
| Papi                 | NEJM                  | TRUE  | FALSE | FALSE | TRUE  | FALSE | FALSE |
| Paradise             | NEJM                  | TRUE  | TRUE  | TRUE  | TRUE  | FALSE | FALSE |
| Park                 | Am J Clin Nutr        | FALSE | TRUE  | TRUE  | FALSE | FALSE | FALSE |
| Patte                | Blood                 | FALSE | TRUE  | TRUE  | FALSE | FALSE | FALSE |
| Patti                | J Am Coll Cardiol     | FALSE | FALSE | FALSE | FALSE | TRUE  | FALSE |
| Pedersen             | Arch Intern Med       | FALSE | FALSE | TRUE  | FALSE | FALSE | FALSE |
| Pengal               | Ann Intern Med        | FALSE | TRUE  | FALSE | FALSE | FALSE | FALSE |
| Peters               | NEJM                  | TRUE  | FALSE | TRUE  | TRUE  | FALSE | FALSE |
| Petrie               | BMJ                   | FALSE | FALSE | TRUE  | FALSE | FALSE | FALSE |
| Petronio             | J Am Coll Cardiol     | FALSE | FALSE | FALSE | FALSE | FALSE | TRUE  |
| Peul                 | NEJM                  | FALSE | TRUE  | TRUE  | FALSE | FALSE | FALSE |
| Picard               | Chest                 | FALSE | FALSE | FALSE | FALSE | FALSE | TRUE  |
| Pierce               | JAMA                  | FALSE | TRUE  | TRUE  | FALSE | FALSE | FALSE |
| Pieters              | Lancet                | FALSE | TRUE  | TRUE  | FALSE | FALSE | FALSE |
| Poggie               | J Bone Joint Surg Am  | FALSE | FALSE | FALSE | FALSE | TRUE  | FALSE |
| Poldermans           | J Am Coll Cardiol     | FALSE | FALSE | FALSE | FALSE | FALSE | TRUE  |
| Pomerantz            | J Urol                | FALSE | FALSE | TRUE  | FALSE | FALSE | FALSE |
| Pope                 | Pediatrics            | FALSE | FALSE | TRUE  | FALSE | FALSE | FALSE |
| Posner               | NEJM                  | TRUE  | FALSE | FALSE | TRUE  | FALSE | FALSE |
| Quasar Collaborative | Lancet                | TRUE  | TRUE  | TRUE  | TRUE  | FALSE | FALSE |
| Rafter               | Am J Clin Nutr        | FALSE | TRUE  | FALSE | FALSE | FALSE | FALSE |
| Rakowski             | Am Heart J            | FALSE | FALSE | FALSE | FALSE | FALSE | TRUE  |
| Ranson               | BMJ                   | FALSE | FALSE | TRUE  | FALSE | FALSE | FALSE |
| Ratcliff             | Lancet                | FALSE | TRUE  | TRUE  | FALSE | FALSE | FALSE |
| Raveendran           | BMJ                   | FALSE | FALSE | TRUE  | FALSE | FALSE | FALSE |
| Recio-Mayoral        | J Am Coll Cardiol     | FALSE | FALSE | FALSE | FALSE | FALSE | TRUE  |



|                    |                       |       |       |       |       |       |       |
|--------------------|-----------------------|-------|-------|-------|-------|-------|-------|
| Reddy              | NEJM                  | FALSE | TRUE  | FALSE | FALSE | FALSE | FALSE |
| Redman             | J Clin Endocrin Metab | FALSE | TRUE  | FALSE | FALSE | FALSE | FALSE |
| Reed               | J Am Coll Surg        | FALSE | FALSE | FALSE | FALSE | FALSE | TRUE  |
| Reid               | J Clin Endocrin Metab | TRUE  | TRUE  | FALSE | TRUE  | FALSE | FALSE |
| REST investigators | NEJM                  | TRUE  | FALSE | FALSE | TRUE  | FALSE | FALSE |
| Reyburn            | BMJ                   | FALSE | FALSE | TRUE  | FALSE | FALSE | FALSE |
| Rhyn               | Am J Psychiatry       | TRUE  | FALSE | FALSE | TRUE  | FALSE | FALSE |
| Robinson           | Obstet Gynecol        | FALSE | FALSE | FALSE | FALSE | FALSE | TRUE  |
| Roche              | Arch Phys Med Rehab   | FALSE | TRUE  | FALSE | FALSE | FALSE | FALSE |
| Roelofs            | Ann Intern Med        | TRUE  | TRUE  | FALSE | TRUE  | FALSE | FALSE |
| Ronco              | BMJ                   | TRUE  | TRUE  | FALSE | TRUE  | FALSE | FALSE |
| Rosenfeld          | Am J Ophthalmol       | TRUE  | FALSE | FALSE | TRUE  | FALSE | FALSE |
| Ross               | Ann Emerg Med         | FALSE | FALSE | TRUE  | FALSE | FALSE | FALSE |
| Rouse              | NEJM                  | FALSE | TRUE  | FALSE | FALSE | FALSE | FALSE |
| Rudolph            | Am J Clin Nutr        | FALSE | FALSE | TRUE  | FALSE | FALSE | FALSE |
| Ruiz-Palacios      | Pediatrics            | TRUE  | FALSE | FALSE | TRUE  | FALSE | FALSE |
| Rynn               | Am J Psychiatry       | TRUE  | FALSE | FALSE | TRUE  | FALSE | FALSE |
| Sachs              | NEJM                  | FALSE | TRUE  | FALSE | FALSE | FALSE | FALSE |
| Sahai              | J Urol                | FALSE | TRUE  | FALSE | FALSE | FALSE | FALSE |
| Sakuramoto         | NEJM                  | TRUE  | FALSE | FALSE | TRUE  | FALSE | FALSE |
| Salminen           | Ann Surg              | FALSE | FALSE | TRUE  | FALSE | FALSE | FALSE |
| Sandborn           | Ann Intern Med        | TRUE  | FALSE | FALSE | TRUE  | FALSE | FALSE |
| Sandborn           | Inflamm Bowel Dis     | TRUE  | FALSE | FALSE | TRUE  | FALSE | FALSE |
| Sandborn           | NEJM                  | TRUE  | TRUE  | FALSE | TRUE  | FALSE | FALSE |
| Sattar             | Arthritis Rheum       | TRUE  | FALSE | TRUE  | TRUE  | FALSE | FALSE |
| SawkaSS            | Arch Intern Med       | TRUE  | TRUE  | FALSE | TRUE  | FALSE | FALSE |
| Sazawal            | BMJ                   | TRUE  | FALSE | FALSE | TRUE  | FALSE | FALSE |
| Sazawal            | Lancet                | FALSE | TRUE  | TRUE  | FALSE | FALSE | FALSE |
| Scarborough        | NEJM                  | TRUE  | TRUE  | FALSE | TRUE  | FALSE | FALSE |

|             |                          |       |       |       |       |       |       |
|-------------|--------------------------|-------|-------|-------|-------|-------|-------|
| Scarborough | NEJM                     | TRUE  | TRUE  | FALSE | TRUE  | FALSE | FALSE |
| Schmid ss   | NEJM                     | TRUE  | TRUE  | FALSE | TRUE  | FALSE | FALSE |
| Schreiber   | NEJM                     | TRUE  | TRUE  | FALSE | TRUE  | FALSE | FALSE |
| Scirica     | Circulation              | TRUE  | FALSE | FALSE | TRUE  | FALSE | FALSE |
| Sconce      | Blood                    | FALSE | FALSE | FALSE | FALSE | FALSE | TRUE  |
| Serisier    | Chest                    | FALSE | FALSE | FALSE | FALSE | FALSE | TRUE  |
| Seymour     | Lancet                   | FALSE | TRUE  | FALSE | FALSE | FALSE | FALSE |
| Sezer       | NEJM                     | FALSE | TRUE  | FALSE | FALSE | FALSE | FALSE |
| Shaddy      | JAMA                     | TRUE  | FALSE | FALSE | TRUE  | FALSE | FALSE |
| Shalaby     | Am J Cardiol             | TRUE  | FALSE | FALSE | TRUE  | FALSE | FALSE |
| Sherman     | Lancet                   | TRUE  | FALSE | FALSE | TRUE  | FALSE | FALSE |
| Shiffman    | NEJM                     | TRUE  | FALSE | FALSE | TRUE  | FALSE | FALSE |
| Shim        | Am J Psychiatry          | FALSE | TRUE  | FALSE | FALSE | FALSE | FALSE |
| Sijbrandij  | Am J Psychiatry          | FALSE | FALSE | TRUE  | FALSE | FALSE | FALSE |
| Simon       | J Clin Endocrin Metab    | TRUE  | FALSE | FALSE | TRUE  | FALSE | FALSE |
| SIN         | Chest                    | FALSE | TRUE  | TRUE  | FALSE | FALSE | FALSE |
| Singh       | NEJM                     | TRUE  | FALSE | FALSE | TRUE  | FALSE | FALSE |
| Singh       | NEJM                     | TRUE  | FALSE | FALSE | TRUE  | FALSE | FALSE |
| Singler     | Anesth Analg             | FALSE | FALSE | FALSE | FALSE | FALSE | TRUE  |
| Slotman     | NEJM                     | FALSE | TRUE  | FALSE | FALSE | FALSE | FALSE |
| Smith       | Lancet                   | TRUE  | FALSE | FALSE | TRUE  | FALSE | FALSE |
| Soliman     | J Urol                   | FALSE | FALSE | FALSE | FALSE | FALSE | TRUE  |
| Spiegel     | Cancer                   | FALSE | TRUE  | TRUE  | FALSE | FALSE | FALSE |
| Staskin     | J Urol                   | TRUE  | FALSE | FALSE | TRUE  | FALSE | FALSE |
| Stavroulaki | Ann Otol Rhinol Laryngol | FALSE | FALSE | FALSE | FALSE | FALSE | TRUE  |
| Stensballe  | Ann Intern Med           | TRUE  | TRUE  | TRUE  | TRUE  | FALSE | FALSE |
| Stewart     | BMJ                      | FALSE | FALSE | TRUE  | FALSE | FALSE | FALSE |
| Stone       | JAMA                     | TRUE  | FALSE | FALSE | TRUE  | FALSE | FALSE |

|                       |                           |       |       |       |       |       |       |
|-----------------------|---------------------------|-------|-------|-------|-------|-------|-------|
| Stone                 | JAMA                      | TRUE  | FALSE | FALSE | TRUE  | FALSE | FALSE |
| Storch                | Arch Neurol               | TRUE  | FALSE | TRUE  | TRUE  | FALSE | FALSE |
| Strander              | Cancer                    | TRUE  | TRUE  | FALSE | TRUE  | FALSE | FALSE |
| Stremmel              | Ann Intern Med            | FALSE | FALSE | TRUE  | FALSE | FALSE | FALSE |
| Su                    | BMJ                       | FALSE | TRUE  | FALSE | FALSE | FALSE | FALSE |
| Sullivan              | NEJM                      | FALSE | TRUE  | FALSE | FALSE | FALSE | FALSE |
| Sultana               | Radiology                 | FALSE | FALSE | FALSE | FALSE | FALSE | TRUE  |
| Sweeney               | NEJM                      | TRUE  | FALSE | FALSE | TRUE  | FALSE | FALSE |
| T?rnqvist             | Am J Respir Crit Care Med | FALSE | TRUE  | TRUE  | FALSE | FALSE | FALSE |
| Tan                   | Obstet Gynecol            | FALSE | FALSE | FALSE | FALSE | FALSE | TRUE  |
| Tardif                | JAMA                      | TRUE  | FALSE | FALSE | TRUE  | FALSE | FALSE |
| Teoh                  | Anaesthesia               | FALSE | FALSE | FALSE | FALSE | FALSE | TRUE  |
| Teppema               | Am J Respir Crit Care Med | FALSE | TRUE  | TRUE  | FALSE | FALSE | FALSE |
| Thapa                 | Am J Trop Med Hyg         | FALSE | TRUE  | FALSE | FALSE | FALSE | FALSE |
| Thiam                 | JAMA                      | FALSE | TRUE  | FALSE | FALSE | FALSE | FALSE |
| Thomson               | Arch Dis Child            | TRUE  | FALSE | FALSE | TRUE  | FALSE | FALSE |
| Tielsch               | Lancet                    | FALSE | TRUE  | TRUE  | FALSE | FALSE | FALSE |
| Torgerson             | Ann Otol Rhinol Laryngol  | FALSE | FALSE | FALSE | FALSE | FALSE | TRUE  |
| Treanor               | JAMA                      | TRUE  | FALSE | FALSE | TRUE  | FALSE | FALSE |
| TRIUMPH Investigators | JAMA                      | TRUE  | FALSE | FALSE | TRUE  | FALSE | FALSE |
| Tunon-de-Lara         | J Allerg Clin Immunol     | FALSE | FALSE | FALSE | FALSE | FALSE | TRUE  |
| Ullman                | NEJM                      | TRUE  | FALSE | FALSE | TRUE  | FALSE | FALSE |
| Uvehammer             | J Bone Joint Surg Br      | TRUE  | TRUE  | TRUE  | TRUE  | FALSE | FALSE |
| Valencia              | Am J Cardiol              | TRUE  | FALSE | FALSE | TRUE  | FALSE | FALSE |
| van Gogh              | NEJM                      | TRUE  | FALSE | FALSE | TRUE  | FALSE | FALSE |
| Van Hoeck             | J Urol                    | TRUE  | FALSE | FALSE | TRUE  | FALSE | FALSE |

|                |                      |       |       |       |       |       |       |
|----------------|----------------------|-------|-------|-------|-------|-------|-------|
| van Ruler      | JAMA                 | FALSE | TRUE  | FALSE | FALSE | FALSE | FALSE |
| van Veen       | Br J Surg            | FALSE | FALSE | FALSE | FALSE | FALSE | TRUE  |
| vanDijk        | JAMA                 | FALSE | FALSE | TRUE  | FALSE | FALSE | FALSE |
| Verdonck       | Blood                | FALSE | FALSE | FALSE | FALSE | FALSE | TRUE  |
| Vetter         | Anesth Analg         | FALSE | FALSE | FALSE | FALSE | FALSE | TRUE  |
| Vicker         | BMJ                  | FALSE | TRUE  | TRUE  | FALSE | FALSE | FALSE |
| Victor         | NEJM                 | TRUE  | TRUE  | FALSE | TRUE  | FALSE | FALSE |
| vonHertzen     | Lancet               | FALSE | TRUE  | FALSE | FALSE | FALSE | FALSE |
| Wallen         | Arch Phys Med Rehab  | FALSE | FALSE | TRUE  | FALSE | FALSE | FALSE |
| Wang           | JAMA                 | FALSE | TRUE  | TRUE  | FALSE | FALSE | FALSE |
| Wapner         | NEJM                 | FALSE | TRUE  | FALSE | FALSE | FALSE | FALSE |
| Wappler        | Anesthesiology       | TRUE  | FALSE | TRUE  | TRUE  | FALSE | FALSE |
| Wathen         | Ann Emerg Med        | FALSE | FALSE | TRUE  | FALSE | FALSE | FALSE |
| Watt           | Anesthesiology       | FALSE | TRUE  | FALSE | FALSE | FALSE | FALSE |
| WAVE trial     | NEJM                 | TRUE  | TRUE  | TRUE  | TRUE  | FALSE | FALSE |
| Westhoff       | Obstet Gynecol       | FALSE | TRUE  | FALSE | FALSE | FALSE | FALSE |
| Whitelaw       | Pediatrics           | FALSE | TRUE  | TRUE  | FALSE | FALSE | FALSE |
| Wijaya-Erhardt | Am J Clin Nutr       | FALSE | FALSE | TRUE  | FALSE | FALSE | FALSE |
| Wilfley        | JAMA                 | FALSE | TRUE  | FALSE | FALSE | FALSE | FALSE |
| Williamson     | JAMA                 | FALSE | TRUE  | FALSE | FALSE | FALSE | FALSE |
| Wilson         | Circulation          | TRUE  | TRUE  | FALSE | TRUE  | FALSE | FALSE |
| Winblad        | Neurology            | TRUE  | FALSE | FALSE | TRUE  | FALSE | FALSE |
| Wiviott        | Circulation          | TRUE  | FALSE | FALSE | TRUE  | FALSE | FALSE |
| Wiviott        | NEJM                 | TRUE  | FALSE | FALSE | TRUE  | FALSE | FALSE |
| Woloshin       | Ann Intern Med       | FALSE | TRUE  | TRUE  | FALSE | FALSE | FALSE |
| Woloshin       | Ann Intern Med       | FALSE | TRUE  | TRUE  | FALSE | FALSE | FALSE |
| Wright         | J Bone Joint Durg Am | FALSE | TRUE  | TRUE  | FALSE | FALSE | FALSE |
| Xue            | Anaesthesia          | FALSE | FALSE | FALSE | FALSE | FALSE | TRUE  |
| Yones          | Arch Dermatology     | TRUE  | FALSE | FALSE | TRUE  | FALSE | FALSE |
| Yu             | Gut                  | FALSE | FALSE | TRUE  | FALSE | FALSE | FALSE |
| Yuen           | Anesth Analg         | FALSE | FALSE | FALSE | FALSE | FALSE | TRUE  |

|            |                |       |       |       |       |       |       |
|------------|----------------|-------|-------|-------|-------|-------|-------|
| Zar        | BMJ            | FALSE | FALSE | TRUE  | FALSE | FALSE | FALSE |
| Zhang      | Anesth analg   | FALSE | FALSE | FALSE | FALSE | FALSE | TRUE  |
| Zheng      | Chest          | TRUE  | FALSE | FALSE | TRUE  | FALSE | FALSE |
| Zimmermann | Am J Clin Nutr | TRUE  | TRUE  | TRUE  | TRUE  | FALSE | FALSE |

**Supplementary file 7: List of studies that did not report a funding source**

| <b>Author</b>  | <b>Journal Name</b>             | <b>Patients randomized per arm</b> | <b>Subgroup reported</b> |
|----------------|---------------------------------|------------------------------------|--------------------------|
| Ainsworth      | Rheumatology                    | 110.5                              | Yes                      |
| Ajalloueyan    | Arch Otolaryngol Head Neck Surg | 122                                | No                       |
| Ayan           | J Urol                          | 26                                 | Yes                      |
| Banks          | Am J Obstet Gynecol             | 10                                 | No                       |
| Barak          | Anaesthesia                     | 85                                 | Yes                      |
| Bashshur       | Arch Ophthalmol                 | 32                                 | No                       |
| Berlucchi      | Pediatrics                      | 10.5                               | No                       |
| Berlucchi      | Pediatrics                      | 30                                 | No                       |
| Bhagat         | J Urol                          | 30                                 | Yes                      |
| Briguori       | Circulation                     | 117.5                              | Yes                      |
| Brisinda       | Br J Surg                       | 50                                 | No                       |
| Choi           | J Thorac Cardiovasc Surg        | 17                                 | No                       |
| Crisafulli     | Chest                           | 30                                 | Yes                      |
| Domingo-Triado | Anesth Analg                    | 30.5                               | Yes                      |
| Ensini         | Clin Orthop Relat Res           | 53.5                               | No                       |
| Erbil          | J Clin Endocrin Metab           | 18                                 | No                       |
| Gacci          | J Urol                          | 12.5                               | No                       |
| Greenfield     | J Urol                          | 21                                 | No                       |
| Greenland      | Anaesthesia                     | 17                                 | No                       |
| Gudziol        | J Urol                          | 10                                 | Yes                      |
| Han-Geurts     | Br J Surg                       | 75                                 | No                       |
| Hayward        | Nursing Research                | 3                                  | No                       |
| Heinstad       | Obstet Gynecol                  | 254                                | No                       |

|               |                           |      |     |
|---------------|---------------------------|------|-----|
| Iijima        | Anesth Analg              | 90   | No  |
| Jannelli      | Am J Obstet Gynecol       | 122  | No  |
| John          | Anaesthesia               | 35   | Yes |
| Jonnvithula   | Anaesthesia               | 20   | No  |
| Khoo          | Ann Surg                  | 35   | No  |
| Khoury        | BJOG                      | 145  | No  |
| Kimberger     | Anaesthesia               | 40   | No  |
| Koc           | Anesth Analg              | 14.5 | No  |
| Kochiadakis   | Am J Cardiol              | 91   | Yes |
| Leardi        | Br J Surg                 | 20   | No  |
| Longobardi    | Am J Cardiol              | 12   | No  |
| Lunde         | Am Heart J                | 50   | No  |
| Luo           | J Thorac Cardiovasc Surg  | 12   | No  |
| Man           | Phys Therap               | 11   | No  |
| Mayer         | Anesth Analg              | 22   | No  |
| Mittermayer   | J Clin Endocrin Metab     | 8    | No  |
| Morice        | Am J Respir Crit Care Med | 27   | No  |
| Naja          | J Laryngol Otol           | 34   | No  |
| O'Neill       | Arch Phys Med Rehab       | 45.5 | Yes |
| Pajno         | J Allerg Clin Immunol     | 28   | Yes |
| Petronio      | J Am Coll Cardiol         | 50.5 | No  |
| Picard        | Chest                     | 34.5 | No  |
| Poldermans    | J Am Coll Cardiol         | 50.5 | No  |
| Rakowski      | Am Heart J                | 29.5 | No  |
| Recio-Mayoral | J Am Coll Cardiol         | 60   | No  |
| Reed          | J Am Coll Surg            | 9    | No  |
| Robinson      | Obstet Gynecol            | 38.5 | Yes |
| Sconce        | Blood                     | 35   | No  |
| Serisier      | Chest                     | 11   | Yes |
| Singler       | Anesth Analg              | 7.5  | No  |

|               |                          |       |     |
|---------------|--------------------------|-------|-----|
| Soliman       | J Urol                   | 25    | No  |
| Stavroulaki   | Ann Otol Rhinol Laryngol | 16    | No  |
| Sultana       | Radiology                | 38.5  | No  |
| Tan           | Obstet Gynecol           | 107.5 | No  |
| Teoh          | Anaesthesia              | 42    | No  |
| Torgerson     | Ann Otol Rhinol Laryngol | 12    | No  |
| Tunon-de-Lara | J Allerg Clin Immunol    | 16.5  | No  |
| van Veen      | Br J Surg                | 150   | No  |
| Verdonck      | Blood                    | 256.5 | Yes |
| Vetter        | Anesth Analg             | 20    | No  |
| Xue           | Anaesthesia              | 31    | No  |
| Yuen          | Anesth Analg             | 6     | No  |
| Zhang         | Anesth analg             | 20    | No  |

**Appendix 8: Regression analyses of factors associated with reporting versus not reporting of subgroup analyses in trials that clearly reported a funding source**

| Study characteristics                                            | Univariable analyses |         | Multivariable analyses |         |
|------------------------------------------------------------------|----------------------|---------|------------------------|---------|
|                                                                  | OR (95% CI)          | P value | OR (95% CI)            | P value |
| Journal type: high impact vs. lower impact journals <sup>a</sup> | 4.71 (3.08 to 7.21)  | < 0.001 | 2.77 (1.65 to 4.62)    | < 0.001 |
| Study area: non-surgical vs. surgical                            | 2.36 (1.41 to 3.95)  | < 0.001 | 1.94 (1.09 to 3.47)    | 0.025   |
| Sample size per arm (quartiles)                                  |                      |         |                        |         |
| 3-32                                                             | 1 [Reference]        |         | 1 [Reference]          |         |
| 33-101                                                           | 2.68 (1.32 to 5.44)  | 0.006   | 2.16 (1.03 to 4.55)    | 0.043   |

|                                                                                                  |                                  |         |                                  |         |
|--------------------------------------------------------------------------------------------------|----------------------------------|---------|----------------------------------|---------|
| 102-301                                                                                          | 6.55 (3.27 to 13.11)             | < 0.001 | 4.01 (1.86 to 8.64)              | < 0.001 |
| 302 or larger                                                                                    | 8.91 (4.46 to 17.82)             | < 0.001 | 3.92 (1.77 to 8.73)              | 0.001   |
| Number of pre-specified primary outcomes                                                         | 1.16 (0.94 to 1.43)              | 0.18    | 1.08 (0.86 to 1.35)              | 0.52    |
| Statistical significance of result for primary outcome: non-significant vs. significant          | 1.53 (1.02 to 2.30) <sup>b</sup> | 0.039   | 1.07 (0.58 to 1.98) <sup>d</sup> | 0.82    |
| Trial funding: industry vs. other                                                                | 1.72 (1.16 to 2.55) <sup>b</sup> | 0.007   | 0.94 (0.53 to 1.64) <sup>d</sup> | 0.82    |
| Statistical significance × trial funding                                                         | 1.74 (0.75 to 4.05) <sup>c</sup> | 0.12    | 3.01 (1.16 to 7.80) <sup>e</sup> | 0.023   |
| -----                                                                                            |                                  |         |                                  |         |
| Association of trial funding ( industry vs. other) with reporting subgroup analyses <sup>f</sup> |                                  |         |                                  |         |
| When the primary outcome was non-significant                                                     | 2.23 (1.18 to 4.23)              | 0.013   | 3.23 (1.57 to 6.66)              | 0.001   |
| When the primary outcome was significant                                                         | 1.28 (0.74 to 2.22)              | 0.38    | 1.07 (0.58 to 1.98)              | 0.82    |

**a:** The higher impact journals include Annals of Internal Medicine, BMJ, JAMA, Lancet, and NEJM. **b:** Estimates of Main effect in the univariable analyses. The interaction term was not included. **c:** Estimates of interaction of significance × significance of main effect obtained from the regression equation:  $Y = \beta_0 + \beta_{\text{funding}} * X_{\text{funding}} + \beta_{\text{significance}} * X_{\text{significance}} + \beta_{\text{interaction}} * X_{\text{interaction}}$ . Estimates of the main effect not shown. **d:** Estimates of main effect including all main effect and interaction terms. **e:** Estimate of interaction significance × trial funding in the multivariable analyses that included all terms. **f:** This section presents the subgroup estimates conditional on the interaction of significance × trial funding, i.e., the association of reporting with trial funding in trials which had a non-significant primary outcome, and the association in trials which had a significant primary outcome



**Appendix 9. Factors associated with pre-specification of subgroup hypotheses in subgroup analyses in trials that clearly reported a funding source**

| Study characteristics                                         | Odds ratio (95% CI)    | P value |
|---------------------------------------------------------------|------------------------|---------|
| High impact vs. lower impact journals                         | 1.59 (0.66 to 3.83)    | 0.30    |
| Study area: non-surgical vs. surgical                         | 3.32 (1.11 to 9.96)    | 0.037   |
| Sample size per arm (quartiles)                               |                        |         |
| 3-32                                                          | 1 [Reference]          |         |
| 33-101                                                        | 5.53 (0.59 to 50.90)   | 0.13    |
| 102-301                                                       | 7.85 (0.84 to 73.49)   | 0.071   |
| 302 or larger                                                 | 10.80 (1.16 to 100.62) | 0.037   |
| Number of pre-specified primary outcomes                      | 1.08 (0.76 to 1.53)    | 0.68    |
| Statistically non-significant vs. significant primary outcome | 1.50 (0.80 to 2.82)    | 0.21    |
| Industry funding vs. no industry funding                      | 0.52 (0.27 to 0.99)    | 0.046   |

\* The interaction of significance of primary outcome with funding was not statistically significant (interaction  $p=0.29$ ), suggesting no differential associations in industry-funded versus non-industry-funded trials. We therefore removed this higher-order term from the regression model.

**Appendix 10. Factors associated with use vs. not use of the interaction test in subgroup analyses  
in trials that clearly reported a funding source**

| Study characteristics                                         | Odds ratio (95% CI) | P value |
|---------------------------------------------------------------|---------------------|---------|
| High impact vs. lower impact journals                         | 2.50 (1.10 to 5.72) | 0.029   |
| Study area: non-surgical vs. surgical                         | 1.16 (0.46 to 2.89) | 0.75    |
| Sample size per arm (quartiles)                               |                     |         |
| 3-32                                                          | 1 [Reference]       |         |
| 33-101                                                        | 1.28 (0.32 to 5.17) | 0.73    |
| 102-301                                                       | 1.18 (0.29 to 4.86) | 0.82    |
| 302 or larger                                                 | 1.94 (0.47 to 7.98) | 0.36    |
| Number of pre-specified primary outcomes                      | 0.94 (0.68 to 1.29) | 0.69    |
| Statistically non-significant vs. significant primary outcome | 1.70 (0.93 to 3.11) | 0.087   |
| Industry funding vs. no industry funding                      | 0.58 (0.32 to 1.08) | 0.084   |

\* The interaction of significance of primary outcome with funding was not statistically significant (interaction  $p=0.39$ ), suggesting no differential associations in industry-funded versus non-industry-funded trials. We therefore removed this high-order term from the regression model.
